# Supplementary material for: Genome-Wide Identification and Characterization of RNA/DNA Differences Associated with Fusarium graminearum Infection in Wheat
Source: Int J Mol Sci. 2022 Jul 20;23(14):7982. doi: 10.3390/ijms23147982 (PMC9316857; doi:10.3390/ijms23147982)
Supplement: Supplementary file 1 [file ijms-23-07982-s001.zip › Supplementary Tables.xlsx]

## Sheet: Table S1
Table S1. Detailed information on the identified FHB-responsive RNA-DNA differences (RDD).
Gene	Editing position (CDS)	CSC (Coding sequence changes)	AAC (Amino acid changes)	Strand	Genome position	Region	Orthologues
TraesCS1A02G201300	213	C > T	Val > Val	-	chr1A_362209999	synonymous variant	-
	204	C > T	Arg > Arg		chr1A_362210008
	195	C > T	Asn > Asn		chr1A_362210017
	194	A > G	Asn > Ser		chr1A_362210018	nonsynonymous variant
	193	A > G	Asn > Asp		chr1A_362210019
	182	T > C	Ile > Thr		chr1A_362210030
	177	C > G	Leu > Leu		chr1A_362210035	synonymous variant
	174	G > C	Val > Val		chr1A_362210038
	171	C > T	Gly > Gly		chr1A_362210041
	168	T > C	Arg > Arg		chr1A_362210044
TraesCS1A02G258800	1206	G > T	Gly > Gly	+	chr1A_452020765	synonymous variant	AtTUBB6
	1212	C > T	Asp > Asp		chr1A_452020771
	1251	C > T	Asp > Asp		chr1A_452020810
	1263	G > A	Glu > Glu		chr1A_452020822
TraesCS1B02G294300	450	G > T	Pro > Pro	-	chr1B_512174399	synonymous variant	AtHSP70-4
	447	C > T	Val > Val		chr1B_512174402
	474	C > T	Arg > Arg		chr1B_512174375
	467	C > A	Ser > Tyr		chr1B_512174382	nonsynonymous variant
	466	T > A	Ser > Thr		chr1B_512174383
TraesCS1D02G083600	297	G > T	Gly > Gly	+	chr1D_66556087	synonymous variant	OsAP1
TraesCS1D02G258800	1117	T > G	Ser > Ala	+	chr1D_351247689	nonsynonymous variant	AtTUBB6
	1120	A > G	Ile > Val		chr1D_351247692
	1131	G > C	Met > Ile		chr1D_351247703
	1136	G > A	Arg > Lys		chr1D_351247708
	1198	G > A	Gly > Ser		chr1D_351247770
	1197	T > A	Thr > Thr		chr1D_351247769	synonymous variant
	1206	G > T	Gly > Gly		chr1D_351247778
	1221	G > A	Glu > Glu		chr1D_351247793
	1227	T > C	Thr > Thr		chr1D_351247799
TraesCS1D02G338400	1315	G > A	Val > Ile	-	chr1D_427619130	nonsynonymous variant	EIF2 GAMMA
TraesCS1D02G405400	-3099	C > T	-	-	chr1D_469890349	upstream gene variant	OsRPS27a
	-3108	C > T	-		chr1D_469890358
	-3117	G > C	-		chr1D_469890367
	-3132	C > A	-		chr1D_469890382
	-3135	G > A	-		chr1D_469890385
	-3158	G > T	-		chr1D_469890408
	-3165	C > A	-		chr1D_469890415
	-3168	C > T	-		chr1D_469890418
TraesCS2A02G083300	273	T > C	Asp > Asp	+	chr2A_38305258	synonymous variant	-
	279	T > C	Pro > Pro		chr2A_38305264
	318	C > T	Thr > Thr		chr2A_38305303
	327	T > C	Ala > Ala		chr2A_38305312
TraesCS2B02G209100	267	G > C	Ser > Ser	+	chr2B_190659662	synonymous variant	ELF5A-3
TraesCS2D02G179300	558	T > C	Val > Val	+	chr2D_123097910	synonymous variant	AtRPS3C
TraesCS2D02G405500	570	C > T	Asp > Asp	-	chr2D_520582953	synonymous variant	rubi3
	615	C > A	Arg > Arg		chr2D_520582908
	603	G > C	Leu > Leu		chr2D_520582920
	580	C > T	Leu > Leu		chr2D_520582943
	535	G > T	Ala > Ser		chr2D_520582988	nonsynonymous variant
TraesCS3A02G087300	875	C > T	Pro > Leu	-	chr3A_56390500	nonsynonymous variant	OsNADPH1
	872	A > T	Glu > Val		chr3A_56390503
TraesCS3A02G263900	441	G > C	Glu > Asp	-	chr3A_487854715	nonsynonymous variant	OsRACK1
	398	C > G	Ala > Gly		chr3A_487854758
	411	C > A	Arg > Arg		chr3A_487854745	synonymous variant
	402	C > T	Ser > Ser		chr3A_487854754
	399	G > T	Ala > Ala		chr3A_487854757
	396	G > C	Ser > Ser		chr3A_487854760
	393	C > T	Val > Val		chr3A_487854763
TraesCS3D02G049300	1034	G > A	-	+	chr3D_18908936	non coding transcript exon variant	-
	1039	C > T	-		chr3D_18908941
	105	G > C	-		chr3D_18908952
	107	A > T	-		chr3D_18908972
	1077	T > C	-		chr3D_18908979
TraesCS3D02G328300	99	T > C	Leu > Leu	+	chr3D_441147419	synonymous variant	CAM2
	108	G > C	Val > Val		chr3D_441147428
	222	C > G	Ala > Ala		chr3D_441147542
	246	T > C	Ser > Ser		chr3D_441147566
TraesCS4A02G097900	520	A > C	Met > Leu	+	chr4A_109424377	nonsynonymous variant	OsHsp71.1
	522	G > C	Met > Ile		chr4A_109424379
	525	G > T	Arg > Arg		chr4A_109424382	synonymous variant
	537	G > A	Glu > Glu		chr4A_109424394
TraesCS4A02G107600	225	T > C	Ile > Ile	-	chr4A_124405655	synonymous variant	-
	219	C > T	Ile > Ile		chr4A_124405661
	205	A > C	Arg > Arg		chr4A_124405675
	192	G > A	Lys > Lys		chr4A_124405688
	177	G > T	Val > Val		chr4A_124405703
	39	T > C	Ile > Ile		chr4A_124405841
	33	G > C	Val > Val		chr4A_124405847
	24	C > T	Ile > Ile		chr4A_124405856
	207	G > T	Arg > Ser		chr4A_124405673	nonsynonymous variant
	28	A > G	Ile > Val		chr4A_124405852
	22	A > C	Ile > Leu		chr4A_124405858
TraesCS4A02G126700	212	A > C	Asn > Thr	+	chr4A_163818872	nonsynonymous variant	OsCam1-3
	214	C > A	Leu > Met		chr4A_163818874
	178	G > A	Gly > Ser		chr4A_163818838
	179	G > A	Gly > Asp		chr4A_163818839
	171	T > C	Asp > Asp		chr4A_163818831	synonymous variant
	174	C > T	Ala > Ala		chr4A_163818834
	177	T > C	Asp > Asp		chr4A_163818837
	201	G > T	Pro > Pro		chr4A_163818861
	210	C > T	Leu > Leu		chr4A_163818870
	222	T > G	Ala > Ala		chr4A_163818882
	246	G > C	Ser > Ser		chr4A_163818906
	351	A > C	Leu > Leu		chr4A_163819011
	354	G > C	Thr > Thr		chr4A_163819014
	366	C > T	Val > Val		chr4A_163819026
	369	C > T	Asp > Asp		chr4A_163819029
	381	C > G	Arg > Arg		chr4A_163819041
TraesCS4A02G190500	285	C > G	Leu > Leu	+	chr4A_469102263	synonymous variant	OsRPS16B
	286	G > A	Val > Ile		chr4A_469102264	nonsynonymous variant
	305	A > T	Tyr > Phe		chr4A_469102283
TraesCS4B02G128700	469	A > G	Ile > Val	+	chr4B_168566902	nonsynonymous variant	AtRPL8A
TraesCS4B02G178200	147	C > T	Leu > Leu	+	chr4B_390280808	synonymous variant	TaCaM1-1
	168	G > C	Val > Val		chr4B_390280829
	174	G > T	Ala > Ala		chr4B_390280835
	201	G > T	Pro > Pro		chr4B_390280862
	210	C > T	Leu > Leu		chr4B_390280871
	222	T > G	Ala > Ala		chr4B_390280883
	178	G > A	Gly > Ser		chr4B_390280839	nonsynonymous variant
	179	G > A	Gly > Asp		chr4B_390280840
	212	A > C	Asn > Thr		chr4B_390280873
	214	C > A	Leu > Met		chr4B_390280875
TraesCS4B02G248500	459	A > G	Leu > Leu	-	chr4B_513725918	synonymous variant	OsSEC61
TraesCS4D02G140800	1310	A > T	Tyr > Phe	-	chr4D_124260515	nonsynonymous variant	OsHSP70
	1347	T > C	Tyr > Tyr		chr4D_124260478	synonymous variant
	1344	T > C	Val > Val		chr4D_124260481
	1314	T > C	Ser > Ser		chr4D_124260511
	1305	C > T	Ser > Ser		chr4D_124260520
TraesCS4D02G207500	477	C > T	Glu > Gln	-	chr4D_355860084	nonsynonymous variant	OsHsp71.1
	386	A > C	Asn > Thr		chr4D_355860059
	384	C > T	Arg > Arg		chr4D_355859968	synonymous variant
	381	G > T	Leu > Leu		chr4D_355860061
	361	G > C	Val > Val		chr4D_355860064
	357	G > T	Ser > Ser		chr4D_355860088
TraesCS4D02G319400	690	C > T	Ser > Ser	+	chr4D_483138160	synonymous variant	AtGAPB
TraesCS5A02G073800	*203	C > T	-	-	chr5A_86181601	downstream gene variant	-
	*194	G > C	-		chr5A_86181610
	*155	G > C	-		chr5A_86181649
	*154	C > G	-		chr5A_86181650
	*153	G > A	-		chr5A_86181651
	*149	T > C	-		chr5A_86181655
TraesCS5A02G078000	1113	T > C	Pro > Pro	+	chr5A_95568180	synonymous variant	-
TraesCS5B02G349100	64	G > A	Val > Ile	+	chr5B_530613650	nonsynonymous variant	-
	67	C > T	Leu > Phe		chr5B_530613653
	21	A > C	Gly > Gly		chr5B_530613607	synonymous variant
	24	C > A	Gly > Gly		chr5B_530613610
	33	G > C	Leu > Leu		chr5B_530613619
	42	C > T	Gly > Gly		chr5B_530613628
	45	C > T	Gly > Gly		chr5B_530613631
	54	C > T	Arg > Arg		chr5B_530613640
	60	G > A	Arg > Arg		chr5B_530613646
	69	C > G	Leu > Leu		chr5B_530613655
	72	C > A	Arg > Arg		chr5B_530613658
	93	C > A	Thr > Thr		chr5B_530613679
TraesCS6A02G119700	310	G > T	Ala > Ser	+	chr6A_91424479	nonsynonymous variant	rubi3
	339	T > C	Pro > Pro		chr6A_91424508	synonymous variant
TraesCS6A02G119800	*2755	G > C	-	-	chr6A_91424433	downstream gene variant	OsEXO70G1
	*2749	T > G	-		chr6A_91424439
	*2737	T > C	-		chr6A_91424451
	*2782	G > A	-		chr6A_91424406
	*2764	G > C	-		chr6A_91424424
	*2761	G > C	-		chr6A_91424427
TraesCS6B02G079200	300	A > T	Gly > Gly	-	chr6B_55694957	synonymous variant	-
	288	C > T	Arg > Arg		chr6B_55694969
	279	C > A	Arg > Arg		chr6B_55694978
	222	C > G	Thr > Thr		chr6B_55695035
	54	C > T	Arg > Arg		chr6B_55695203
	45	C > T	Gly > Gly		chr6B_55695212
	33	G > C	Leu > Leu		chr6B_55695224
	30	G > T	Gly > Gly		chr6B_55695227
	24	G > A	Gly > Gly		chr6B_55695233
TraesCS6B02G110300	310	G > T	Ala > Ser	-	chr6B_92532418	nonsynonymous variant	-
TraesCS6B02G148000	85	G > T	Ala > Ser	+	chr6B_149055266	nonsynonymous variant	UBQ11
	208	C > T	Leu > Phe		chr6B_149055389
	108	C > T	Gly > Gly		chr6B_149055289	synonymous variant
	129	C > A	Arg > Arg		chr6B_149055310
	621	C > A	Arg > Arg		chr6B_149055802
	210	T > G	Leu > Leu		chr6B_149055391
TraesCS6B02G164600	369	C > T	Gly > Gly	-	chr6B_171728092	synonymous variant	rubq2
	354	C > A	Arg > Arg		chr6B_171728107
TraesCS6D02G401900	1200	G > T	Thr > Thr	+	chr6D_470684693	synonymous variant	EIF4A3A
	1204	A > G	Ile > Val		chr6D_470684697	nonsynonymous variant
TraesCS7A02G119700	161	A > G	Lys > Arg	+	chr7A_77150263	nonsynonymous variant	-
	241	A > T	Thr > Ser		chr7A_77150343
	125	T > A	Phe > Tyr		chr7A_77150227
	12	G > T	Thr > Thr		chr7A_77150114	synonymous variant
	21	G > C	Thr > Thr		chr7A_77150123
	27	C > A	Arg > Arg		chr7A_77150129
	36	C > T	Thr > Thr		chr7A_77150138
	219	G > T	Arg > Arg		chr7A_77150321
	225	C > T	Ile > Ile		chr7A_77150327
	228	G > T	Ala > Ala		chr7A_77150330
	243	C > T	Thr > Thr		chr7A_77150345
	246	C > T	Asp > Asp		chr7A_77150348
	372	C > T	Asp > Asp		chr7A_77150474
	117	C > T	Pro > Pro		chr7A_77150219
	135	A > T	Gly > Gly		chr7A_77150237
Note:"-" represents the upstream sequence position of CDS sequence; "*" represents the downstream sequence position of CDS sequence.

## Sheet: Table S2
Table S2. Coverage of RDD sites before and after editing.
Edit site	Gene	Transcript	Orthologues	Coding protein	DPI	Group	Editing efficiency ( (Total reads / Percent of variation reads))
							HC374 (Control)	HC374 (Treatment)	Nyubai (Control)	Nyubai (Treatment)	Wuhan 1 (Control)	Wuhan 1 (Treatment)	Shaw (Control)	Shaw (Treatment)
chr1B_512174399	TraesCS1B02G294300	TraesCS1B02G294300.1	AtHSP70-4	Heat shock 70 kDa protein 4	4	Four common	808/0%,265/0%,693/0%	968/14%,829/17%,371/26%	178/0%,416/0%,622/0%	191/17%,532/20%,900/19%	405/0%,566/0%,348/0%	532/24%,666/30%,575/33%	468/0%,65/0%,364/0%	277/92%,861/91%,866/88%
chr1B_512174402	TraesCS1B02G294300		AtHSP70-4	Heat shock 70 kDa protein 4	4	Four common	827/0%,274/0%,716/0%	962/14%,842/17%,377/25%	183/0%,428/0%,635/0%	193/17%,536/19%,908/19%	415/0%,582/0%,373/0%	520/23%,666/30%,585/31%	475/0%,65/0%,374/1%	255/93%,814/95%,838/91%
chr1D_351247689	TraesCS1D02G258800	TraesCS1D02G258800.1	AtTUBB6	Tubulin beta chain	4	Four common	786/0%,268/0%,594/0%	352/10%,391/18%,211/15%	293/0%,395/0%,538/0%	191/10%,386/15%,484/15%	426/0%,576/0%,569/0%	351/19%,539/32%,554/29%	271/0%,25/0%,150/0%	39/69%,259/90%,367/83%
chr1D_351247692	TraesCS1D02G258800		AtTUBB6	Tubulin beta chain	4	Four common	785/0%,268/0%,607/0%	350/10%,394/18%,211/15%	291/0%,391/0%,541/0%	194/10%,387/15%,482/15%	425/0%,573/0%,572/0%	350/19%,545/32%,560/29%	269/0%,25/0%,151/0%	39/69%,258/91%,368/83%
chr1D_351247703	TraesCS1D02G258800		AtTUBB6	Tubulin beta chain	4	Four common	815/0%,305/0%,661/0%	371/9%,438/16%,232/13%	321/0%,405/0%,621/0%	214/9%,424/14%,542/13%	457/0%,613/0%,641/0%	368/18%,596/29%,615/26%	296/0%,26/0%,175/0%	39/69%,267/88%,374/82%
chr1D_351247708	TraesCS1D02G258800		AtTUBB6	Tubulin beta chain	4	Four common	836/0%,312/0%,662/0%	387/9%,435/17%,233/13%	331/0%,431/0%,616/0%	229/9%,428/13%,551/13%	480/0%,638/0%,640/0%	368/18%,599/29%,603/27%	315/0%,29/3%,170/0%	40/70%,266/89%,374/83%
chr1D_351247769	TraesCS1D02G258800		AtTUBB6	Tubulin beta chain	4	Four common	969/1%,351/0%,800/1%	517/28%,564/29%,340/26%	375/0%,505/1%,716/1%	301/20%,550/23%,695/26%	557/1%,785/2%,744/1%	578/33%,851/43%,886/42%	380/3%,38/3%,226/2%	153/89%,595/92%,736/89%
chr1D_351247770	TraesCS1D02G258800		AtTUBB6	Tubulin beta chain	4	Four common	938/0%,348/0%,806/0%	507/27%,565/29%,341/26%	368/0%,490/0%,718/0%	296/19%,550/23%,697/26%	542/0%,771/1%,740/0%	566/33%,848/43%,876/41%	375/1%,38/0%,225/0%	152/89%,591/92%,731/89%
chr1D_351247778	TraesCS1D02G258800		AtTUBB6	Tubulin beta chain	4	Four common	900/0%,347/0%,822/0%	501/28%,608/28%,347/26%	357/0%,491/0%,728/0%	300/19%,540/23%,703/26%	554/0%,756/0%,760/0%	550/35%,871/43%,924/42%	370/0%,37/0%,260/0%	156/89%,616/92%,759/89%
chr1D_351247793	TraesCS1D02G258800		AtTUBB6	Tubulin beta chain	4	Four common	1040/0%,431/0%,934/0%	546/23%,633/24%,387/22%	423/0%,559/0%,810/0%	338/16%,545/21%,766/22%	683/0%,892/0%,858/0%	583/30%,880/39%,925/38%	418/0%,38/0%,285/0%	142/88%,592/90%,722/86%
chr1D_351247799	TraesCS1D02G258800		AtTUBB6	Tubulin beta chain	4	Four common	1043/0%,422/0%,920/0%	531/19%,611/23%,372/21%	429/0%,550/0%,788/0%	318/16%,529/21%,737/20%	692/0%,887/0%,837/0%	564/26%,849/37%,882/36%	418/0%,38/0%,281/0%	116/84%,542/89%,663/85%
chr1D_427619130	TraesCS1D02G338400	TraesCS1D02G338400.1	EIF2 GAMMA	Protein-synthesizing GTPase	4	Four common	129/0%,18/0%,108/0%	208/13%,109/31%,58/21%	10/0%,81/0%,96/0%	52/23%,179/11%,314/10%	51/0%,78/0%,32/6%	122/10%,138/38%,106/53%	77/0%,11/0%,55/0%	40/70%,141/81%,240/72%
chr1D_469890349	TraesCS1D02G405400	TraesCS1D02G405400.1	OsRPS27a	Ubiquitin-40S ribosomal protein S27a-1	4	Four common	704/1%,171/0%,618/0%	896/41%,1076/55%,821/53%	176/0%,592/0%,690/0%	428/30%,1292/46%,1803/34%	254/1%,400/1%,314/1%	636/28%,1010/61%,924/66%	475/0%,59/0%,412/0%	514/93%,1540/94%,1652/91%
chr1D_469890358	TraesCS1D02G405400		OsRPS27a	Ubiquitin-40S ribosomal protein S27a-1	4	Four common	695/0%,172/0%,587/0%	943/40%,1173/53%,876/53%	158/0%,571/0%,677/0%	438/32%,1377/45%,1855/34%	251/1%,401/0%,286/0%	684/30%,1121/57%,1091/60%	465/0%,60/0%,396/0%	559/89%,2059/75%,2291/71%
chr1D_469890367	TraesCS1D02G405400		OsRPS27a	Ubiquitin-40S ribosomal protein S27a-1	4	Four common	700/0%,173/0%,592/0%	950/43%,1172/62%,866/58%	155/1%,565/0%,683/0%	437/34%,1359/51%,1841/39%	253/0%,405/0%,280/1%	696/34%,1112/66%,1091/75%	469/0%,60/0%,400/0%	564/95%,2063/96%,2294/94%
chr1D_469890382	TraesCS1D02G405400		OsRPS27a	Ubiquitin-40S ribosomal protein S27a-1	4	Four common	742/0%,177/0%,597/0%	1161/19%,1511/26%,1107/26%	143/0%,606/0%,683/0%	483/14%,1513/14%,1968/10%	267/1%,410/0%,244/0%	939/27%,1471/29%,1503/33%	498/0%,64/0%,399/0%	761/31%,2898/36%,3583/43%
chr1D_469890385	TraesCS1D02G405400		OsRPS27a	Ubiquitin-40S ribosomal protein S27a-1	4	Four common	742/0%,178/0%,608/0%	1168/20%,1514/26%,1108/27%	139/0%,607/0%,690/0%	479/15%,1509/14%,1979/10%	268/0%,418/0%,239/0%	953/27%,1487/30%,1511/33%	502/0%,64/0%,404/0%	772/32%,2924/37%,3624/43%
chr1D_469890408	TraesCS1D02G405400		OsRPS27a	Ubiquitin-40S ribosomal protein S27a-1	4	Four common	658/0%,127/0%,614/0%	839/32%,1211/39%,899/37%	75/0%,534/0%,684/0%	302/25%,1250/22%,1696/15%	198/0%,347/0%,180/0%	759/40%,1183/44%,1175/53%	423/0%,58/0%,403/0%	449/67%,2255/66%,2879/70%
chr1D_469890415	TraesCS1D02G405400		OsRPS27a	Ubiquitin-40S ribosomal protein S27a-1	4	Four common	621/0%,120/0%,603/0%	819/32%,1189/38%,880/35%	66/0%,498/0%,676/0%	295/26%,1231/21%,1643/14%	185/0%,329/0%,157/0%	747/39%,1156/42%,1145/51%	393/0%,54/0%,399/0%	437/66%,2220/64%,2829/67%
chr1D_469890418	TraesCS1D02G405400		OsRPS27a	Ubiquitin-40S ribosomal protein S27a-1	4	Four common	578/0%,107/0%,597/0%	778/30%,1170/33%,867/33%	63/0%,466/0%,672/0%	280/26%,1205/17%,1625/11%	174/0%,303/0%,155/0%	720/36%,1134/38%,1138/43%	363/0%,51/0%,391/0%	425/59%,2199/49%,2820/54%
chr1D_66556087	TraesCS1D02G083600	TraesCS1D02G083600.1	OsAP1	Aspartic proteinase	4	Four common	261/0%,114/0%,212/0%	435/25%,504/30%,346/21%	154/0%,114/0%,210/0%	193/16%,342/22%,437/24%	200/0%,259/0%,274/0%	407/24%,437/47%,574/40%	244/0%,12/0%,178/0%	175/86%,609/83%,614/80%
chr2A_38305258	TraesCS2A02G083300	TraesCS2A02G083300.1	-	Elongation factor 1-alpha	4	Four common	765/0%,395/1%,605/0%	1185/36%,1476/40%,1118/37%	535/1%,476/0%,629/0%	996/19%,1241/34%,1710/35%	482/0%,692/0%,720/0%	1223/41%,1416/56%,1749/59%	519/0%,46/0%,391/0%	738/87%,2187/92%,2831/85%
chr2A_38305264	TraesCS2A02G083300		-	Elongation factor 1-alpha	4	Four common	791/1%,405/0%,603/0%	1227/37%,1573/42%,1179/39%	553/0%,477/0%,645/0%	1039/19%,1315/36%,1779/36%	494/0%,709/0%,747/0%	1294/41%,1513/58%,1867/61%	529/0%,49/0%,403/0%	778/88%,2382/92%,3080/86%
chr2A_38305303	TraesCS2A02G083300		-	Elongation factor 1-alpha	4	Four common	814/0%,430/0%,707/0%	1394/39%,1939/47%,1459/41%	605/0%,502/0%,772/0%	1166/20%,1650/42%,2130/41%	541/0%,757/0%,824/0%	1433/45%,1936/62%,2344/65%	583/0%,54/0%,446/0%	909/88%,3062/92%,3896/87%
chr2A_38305312	TraesCS2A02G083300		-	Elongation factor 1-alpha	4	Four common	891/0%,481/2%,770/0%	1398/34%,1920/43%,1493/37%	680/1%,584/0%,835/0%	1213/17%,1663/39%,2100/37%	611/0%,815/0%,860/0%	1406/40%,1907/58%,2268/61%	653/0%,60/0%,485/0%	834/86%,2834/90%,3618/85%
chr2B_190659662	TraesCS2B02G209100	TraesCS2B02G209100.1	ELF5A-3	Eukaryotic translation initiation factor 5A-3	4	Four common	523/0%,150/0%,384/0%	667/52%,871/55%,575/47%	249/0%,421/0%,512/0%	316/23%,730/31%,841/29%	360/0%,330/0%,353/0%	523/51%,780/59%,794/72%	550/0%,76/0%,554/0%	365/89%,1392/88%,1887/90%
chr2D_123097910	TraesCS2D02G179300	TraesCS2D02G179300.1	AtRPS3C	40S ribosomal protein S3-3	2	Four common	236/1%,266/0%,304/0%	353/5%,437/9%,380/10%	587/0%,325/0%,357/0%	403/6%,319/6%,361/4%	287/0%,229/0%,250/0%	313/3%,370/4%,613/1%	230/0%,339/0%,148/1%	70/10%,215/8%,299/25%
chr2D_123097910	TraesCS2D02G179300		AtRPS3C	40S ribosomal protein S3-3	4	Four common	435/0%,194/0%,345/0%	399/18%,413/19%,410/9%	367/0%,320/0%,396/0%	336/4%,520/13%,700/14%	323/0%,312/0%,400/0%	366/28%,496/24%,457/33%	220/0%,32/0%,339/0%	70/66%,309/62%,428/71%
chr2D_520582953	TraesCS2D02G405500	TraesCS2D02G405500.1	rubi3	Polyubiquitin	4	Four common	128/0%,41/0%,58/0%	531/68%,397/68%,223/73%	32/0%,92/0%,64/0%	283/62%,347/70%,379/52%	76/0%,119/0%,61/0%	548/78%,360/83%,427/79%	109/0%,9/0%,71/0%	549/94%,1120/92%,1338/89%
chr2D_520582988	TraesCS2D02G405500		rubi3	Polyubiquitin	2	Four common	165/7%,173/0%,173/1%	227/21%,322/52%,339/48%	269/0%,133/0%,160/3%	358/43%,320/49%,113/31%	242/0%,183/0%,122/0%	271/45%,149/34%,144/40%	167/0%,223/0%,203/3%	144/65%,395/58%,657/57%
chr2D_520582988	TraesCS2D02G405500		rubi3	Polyubiquitin	4	Four common	191/0%,63/0%,116/0%	578/60%,518/52%,279/58%	70/0%,124/0%,134/0%	335/52%,439/55%,464/43%	121/0%,176/0%,134/0%	601/68%,412/73%,512/65%	204/0%,19/0%,151/0%	567/89%,1224/84%,1577/76%
chr3A_487854715	TraesCS3A02G263900	TraesCS3A02G263900.1	OsRACK1	Guanine nucleotide-binding protein subunit beta-like protein A	4	Four common	805/0%,201/0%,787/0%	1350/53%,1416/65%,795/64%	114/1%,603/0%,701/0%	374/58%,1186/39%,1659/34%	198/0%,333/0%,211/0%	1240/59%,1543/72%,1457/82%	545/0%,74/0%,454/0%	856/96%,2457/97%,3155/95%
chr3A_487854745	TraesCS3A02G263900		OsRACK1	Guanine nucleotide-binding protein subunit beta-like protein A	2	Four common	418/7%,577/0%,800/0%	905/11%,1244/39%,1324/34%	1126/0%,315/0%,850/0%	523/21%,606/31%,570/16%	277/0%,274/0%,460/0%	609/20%,975/12%,447/18%	135/0%,74/0%,430/0%	198/61%,438/64%,1351/59%
chr3A_487854745	TraesCS3A02G263900		OsRACK1	Guanine nucleotide-binding protein subunit beta-like protein A	4	Four common	683/0%,148/0%,734/0%	1292/52%,1420/67%,796/66%	78/0%,488/0%,680/0%	327/61%,1195/40%,1694/34%	154/0%,254/1%,149/1%	1079/63%,1583/72%,1460/84%	468/0%,59/0%,486/0%	790/95%,2478/96%,3305/95%
chr3A_487854754	TraesCS3A02G263900		OsRACK1	Guanine nucleotide-binding protein subunit beta-like protein A	4	Four common	730/0%,152/0%,659/0%	1138/40%,1130/62%,655/60%	82/0%,516/0%,620/0%	287/52%,1013/34%,1535/28%	159/0%,258/0%,121/0%	912/52%,1246/65%,1114/81%	485/0%,58/0%,461/0%	536/90%,1774/94%,2446/93%
chr3A_487854757	TraesCS3A02G263900		OsRACK1	Guanine nucleotide-binding protein subunit beta-like protein A	4	Four common	729/0%,144/0%,667/0%	1092/39%,1123/62%,649/61%	79/0%,505/0%,617/0%	269/49%,1009/34%,1545/27%	153/0%,254/0%,119/1%	852/50%,1239/65%,1098/82%	479/0%,58/0%,460/0%	488/91%,1749/95%,2409/93%
chr3A_487854758	TraesCS3A02G263900		OsRACK1	Guanine nucleotide-binding protein subunit beta-like protein A	4	Four common	744/0%,146/0%,668/0%	1098/39%,1122/62%,649/61%	81/1%,510/0%,618/0%	271/49%,1009/34%,1544/27%	154/0%,257/0%,119/0%	859/50%,1239/65%,1097/82%	492/0%,61/0%,460/0%	489/91%,1749/95%,2409/93%
chr3A_487854760	TraesCS3A02G263900		OsRACK1	Guanine nucleotide-binding protein subunit beta-like protein A	4	Four common	756/0%,145/0%,662/0%	1101/39%,1114/63%,647/60%	84/0%,513/0%,606/0%	274/48%,1002/34%,1535/28%	156/0%,261/0%,117/0%	868/50%,1238/65%,1097/82%	500/0%,61/0%,454/0%	490/91%,1748/95%,2409/93%
chr3A_487854763	TraesCS3A02G263900		OsRACK1	Guanine nucleotide-binding protein subunit beta-like protein A	4	Four common	755/0%,140/0%,641/0%	1098/39%,1101/63%,648/61%	84/0%,509/0%,591/0%	274/48%,987/35%,1501/28%	157/0%,261/0%,117/0%	867/50%,1225/66%,1094/82%	497/0%,63/0%,440/0%	490/91%,1748/95%,2402/94%
chr3D_441147419	TraesCS3D02G328300	TraesCS3D02G328300.1	CAM2	Calmodulin-2	4	Four common	299/0%,102/3%,319/0%	251/22%,250/17%,158/15%	71/1%,201/0%,251/0%	90/39%,268/13%,386/10%	193/0%,371/0%,152/0%	285/16%,235/12%,226/17%	205/0%,16/0%,125/0%	75/87%,148/87%,179/73%
chr3D_441147428	TraesCS3D02G328300		CAM2	Calmodulin-2	4	Four common	308/0%,100/0%,332/0%	269/21%,258/16%,161/14%	74/0%,199/0%,262/0%	100/35%,272/14%,394/10%	205/0%,386/0%,163/0%	297/17%,245/12%,235/16%	207/0%,17/0%,139/0%	79/87%,143/88%,180/72%
chr3D_441147542	TraesCS3D02G328300		CAM2	Calmodulin-2	4	Four common	321/0%,97/0%,258/0%	265/25%,259/16%,176/22%	135/0%,203/0%,209/0%	153/30%,249/16%,347/15%	212/0%,322/0%,215/0%	257/26%,232/17%,268/16%	188/0%,12/0%,126/0%	87/92%,206/81%,204/81%
chr3D_441147566	TraesCS3D02G328300		CAM2	Calmodulin-2	4	Four common	183/0%,61/0%,209/0%	197/34%,198/22%,125/29%	85/0%,133/0%,145/0%	126/39%,181/20%,282/18%	126/0%,186/1%,161/0%	183/39%,198/21%,197/23%	120/0%,8/0%,83/0%	96/92%,200/91%,205/84%
chr4A_109424377	TraesCS4A02G097900	TraesCS4A02G097900.1	OsHsp71.1	-	4	Four common	152/0%,44/0%,123/0%	703/17%,663/26%,209/40%	17/0%,104/0%,146/0%	104/21%,478/29%,613/23%	54/0%,86/0%,31/0%	516/17%,601/37%,556/42%	110/0%,8/0%,92/0%	189/77%,796/73%,1124/71%
chr4A_109424379	TraesCS4A02G097900		OsHsp71.1	-	4	Four common	153/0%,45/0%,119/0%	694/17%,655/26%,208/40%	17/0%,104/0%,142/0%	104/21%,480/29%,606/23%	55/0%,81/0%,33/0%	510/17%,599/37%,556/42%	113/0%,8/0%,91/0%	189/78%,797/74%,1122/71%
chr4A_109424382	TraesCS4A02G097900		OsHsp71.1	-	4	Four common	148/0%,45/0%,119/0%	685/17%,643/27%,208/42%	17/0%,101/0%,134/0%	102/22%,478/28%,588/23%	55/0%,83/0%,31/0%	499/17%,586/36%,552/41%	111/0%,7/0%,89/0%	190/78%,814/73%,1133/69%
chr4A_109424394	TraesCS4A02G097900		OsHsp71.1	-	4	Four common	142/0%,41/0%,104/0%	713/23%,712/36%,253/46%	14/0%,91/0%,117/1%	122/32%,515/37%,641/33%	52/0%,74/0%,26/0%	554/22%,768/43%,766/47%	101/0%,7/0%,90/1%	335/70%,1447/67%,1886/66%
chr4A_124405655	TraesCS4A02G107600	TraesCS4A02G107600.1	-	Elongation factor 1-alpha	2	Four common	942/4%,1152/1%,1478/1%	1297/9%,1777/34%,1748/30%	1658/0%,1115/1%,1445/0%	1050/27%,1174/29%,920/24%	1051/0%,877/0%,1064/0%	953/20%,1223/18%,557/32%	861/0%,1167/0%,642/2%	336/49%,667/60%,1542/66%
chr4A_124405655	TraesCS4A02G107600		-	Elongation factor 1-alpha	4	Four common	1450/0%,719/2%,1407/0%	1934/57%,2430/56%,1919/43%	951/1%,1050/0%,1412/1%	1445/39%,2209/46%,2810/43%	719/0%,1146/0%,1391/0%	2034/62%,2223/63%,2752/69%	937/0%,104/0%,720/0%	1478/97%,3407/98%,3573/94%
chr4A_124405661	TraesCS4A02G107600		-	Elongation factor 1-alpha	2	Four common	922/4%,1111/0%,1397/0%	1287/8%,1739/36%,1690/32%	1636/0%,1088/0%,1332/0%	1043/28%,1154/31%,900/24%	1040/0%,859/0%,979/0%	940/21%,1199/19%,543/34%	840/0%,1142/0%,598/3%	343/50%,674/61%,1528/68%
chr4A_124405661	TraesCS4A02G107600		-	Elongation factor 1-alpha	4	Four common	1408/0%,699/0%,1329/0%	1954/58%,2396/58%,1882/44%	930/0%,1023/0%,1356/0%	1441/40%,2145/48%,2736/46%	702/0%,1131/0%,1295/0%	2056/64%,2190/65%,2734/71%	920/0%,105/0%,692/0%	1527/97%,3474/98%,3641/94%
chr4A_124405673	TraesCS4A02G107600		-	Elongation factor 1-alpha	2	Four common	927/4%,1122/1%,1374/0%	1287/9%,1758/37%,1718/33%	1676/0%,1103/0%,1306/0%	1057/29%,1178/32%,921/25%	1053/0%,883/0%,943/0%	975/21%,1207/19%,589/33%	866/0%,1131/0%,589/3%	360/52%,680/63%,1568/70%
chr4A_124405673	TraesCS4A02G107600		-	Elongation factor 1-alpha	4	Four common	1452/0%,718/0%,1309/0%	2005/59%,2416/60%,1930/45%	959/0%,1050/0%,1351/1%	1481/41%,2188/49%,2766/47%	720/0%,1150/0%,1262/0%	2118/63%,2256/66%,2785/73%	948/0%,104/0%,682/0%	1557/98%,3500/98%,3721/94%
chr4A_124405675	TraesCS4A02G107600		-	Elongation factor 1-alpha	2	Four common	940/4%,1120/1%,1378/2%	1303/10%,1767/37%,1727/33%	1688/0%,1120/3%,1310/0%	1056/29%,1183/32%,920/26%	1064/0%,889/0%,945/0%	988/21%,1218/19%,598/33%	875/0%,1140/0%,594/3%	360/53%,676/63%,1569/70%
chr4A_124405675	TraesCS4A02G107600		-	Elongation factor 1-alpha	4	Four common	1460/0%,726/1%,1315/0%	2011/59%,2431/59%,1946/46%	972/2%,1059/0%,1346/1%	1491/41%,2203/49%,2783/46%	735/0%,1152/0%,1273/0%	2126/63%,2280/65%,2789/73%	944/0%,104/0%,689/0%	1555/98%,3489/98%,3727/94%
chr4A_124405688	TraesCS4A02G107600		-	Elongation factor 1-alpha	2	Four common	971/4%,1138/1%,1407/0%	1383/9%,1831/38%,1808/34%	1756/1%,1140/0%,1365/1%	1102/30%,1233/33%,953/25%	1111/1%,921/1%,965/1%	1051/22%,1220/21%,621/33%	916/0%,1180/1%,607/4%	380/53%,685/66%,1672/71%
chr4A_124405688	TraesCS4A02G107600		-	Elongation factor 1-alpha	4	Four common	1498/1%,773/0%,1345/1%	2135/59%,2530/61%,2031/44%	1012/0%,1113/1%,1387/1%	1570/42%,2311/49%,2896/47%	773/0%,1150/1%,1319/1%	2249/63%,2395/65%,2919/74%	954/1%,108/1%,718/1%	1639/98%,3649/98%,3970/94%
chr4A_124405703	TraesCS4A02G107600		-	Elongation factor 1-alpha	4	Four common	1319/0%,692/0%,1288/0%	1555/49%,2364/60%,1925/44%	939/0%,1007/0%,1316/0%	1253/32%,2195/49%,2713/46%	719/0%,1003/0%,1218/0%	1606/51%,2240/64%,2748/73%	833/0%,97/0%,668/0%	1012/96%,3369/98%,3689/94%
chr4A_124405841	TraesCS4A02G107600		-	Elongation factor 1-alpha	2	Four common	529/1%,548/0%,963/1%	732/4%,933/18%,990/13%	1098/0%,710/0%,966/1%	431/11%,574/14%,455/11%	619/0%,596/0%,663/0%	481/6%,621/6%,334/16%	576/0%,604/0%,428/1%	97/12%,264/43%,644/42%
chr4A_124405841	TraesCS4A02G107600		-	Elongation factor 1-alpha	4	Four common	764/0%,446/0%,993/0%	772/31%,1039/34%,966/20%	529/0%,625/0%,874/0%	628/16%,1150/24%,1393/25%	415/0%,569/0%,836/0%	818/36%,1102/40%,1233/51%	433/0%,79/0%,467/0%	357/92%,1340/94%,1363/89%
chr4A_124405847	TraesCS4A02G107600		-	Elongation factor 1-alpha	4	Four common	746/0%,424/1%,968/0%	703/28%,974/32%,916/19%	486/1%,612/0%,847/0%	601/13%,1089/23%,1334/25%	394/0%,527/0%,806/0%	753/32%,1047/39%,1165/49%	420/0%,77/0%,452/0%	317/92%,1256/93%,1256/88%
chr4A_124405852	TraesCS4A02G107600		-	Elongation factor 1-alpha	2	Four common	511/1%,510/0%,821/0%	688/2%,820/18%,871/14%	1136/0%,736/0%,844/0%	402/10%,498/16%,387/10%	592/1%,625/0%,577/0%	442/5%,537/6%,292/18%	548/0%,548/0%,375/1%	86/10%,234/45%,577/43%
chr4A_124405852	TraesCS4A02G107600		-	Elongation factor 1-alpha	4	Four common	751/0%,425/0%,863/0%	697/28%,897/36%,816/21%	472/0%,608/0%,746/0%	605/13%,980/25%,1217/27%	395/0%,514/0%,705/0%	738/32%,959/42%,1077/53%	420/0%,74/0%,406/0%	318/92%,1230/95%,1225/90%
chr4A_124405856	TraesCS4A02G107600		-	Elongation factor 1-alpha	2	Four common	520/1%,517/0%,784/0%	692/2%,789/18%,834/15%	1155/0%,748/0%,801/0%	407/10%,479/16%,371/11%	600/0%,633/0%,551/0%	447/4%,508/6%,279/19%	555/0%,551/0%,360/1%	87/10%,225/47%,558/45%
chr4A_124405856	TraesCS4A02G107600		-	Elongation factor 1-alpha	4	Four common	757/0%,429/0%,822/0%	697/28%,867/36%,785/21%	473/0%,605/0%,712/0%	610/13%,947/25%,1174/28%	393/0%,516/0%,667/0%	743/31%,929/43%,1046/54%	421/0%,74/0%,384/0%	318/91%,1221/95%,1210/91%
chr4A_124405858	TraesCS4A02G107600		-	Elongation factor 1-alpha	2	Four common	540/1%,536/0%,777/0%	741/3%,786/18%,829/14%	1260/0%,815/0%,799/0%	434/9%,479/16%,375/11%	629/0%,678/0%,551/0%	481/4%,510/6%,279/19%	577/0%,573/0%,360/1%	88/10%,225/47%,554/45%
chr4A_124405858	TraesCS4A02G107600		-	Elongation factor 1-alpha	4	Four common	809/0%,454/1%,813/0%	729/27%,862/37%,780/22%	490/1%,640/0%,706/0%	653/12%,944/26%,1170/28%	430/0%,542/0%,659/0%	780/30%,927/43%,1047/54%	450/0%,77/0%,380/0%	322/89%,1221/95%,1211/90%
chr4A_163818831	TraesCS4A02G126700	TraesCS4A02G126700.1	OsCam1-3	Calmodulin-1	4	Four common	126/0%,32/3%,88/0%	157/15%,138/20%,88/14%	31/0%,53/0%,68/0%	69/26%,136/16%,138/11%	71/0%,88/0%,56/0%	109/14%,137/15%,113/19%	88/0%,8/0%,45/0%	32/69%,96/79%,123/71%
chr4A_163818834	TraesCS4A02G126700		OsCam1-3	Calmodulin-1	4	Four common	126/0%,32/0%,88/0%	155/15%,139/19%,89/13%	32/0%,52/0%,68/0%	69/26%,138/17%,140/11%	72/0%,89/0%,56/0%	112/13%,136/15%,112/21%	88/0%,8/0%,45/0%	31/65%,94/79%,122/70%
chr4A_163818837	TraesCS4A02G126700		OsCam1-3	Calmodulin-1	4	Four common	123/0%,32/0%,89/0%	151/15%,139/19%,89/12%	31/0%,51/0%,69/0%	68/26%,138/17%,141/11%	69/0%,88/0%,56/0%	112/13%,137/15%,112/20%	88/0%,9/0%,45/0%	31/61%,94/79%,122/70%
chr4A_163818838	TraesCS4A02G126700		OsCam1-3	Calmodulin-1	4	Four common	123/0%,32/0%,89/0%	150/15%,139/21%,89/13%	31/0%,51/0%,69/0%	68/26%,138/17%,141/11%	69/0%,88/0%,56/0%	112/13%,137/15%,110/20%	89/1%,9/0%,45/0%	31/65%,93/80%,121/71%
chr4A_163818839	TraesCS4A02G126700		OsCam1-3	Calmodulin-1	4	Four common	124/1%,32/0%,90/1%	152/16%,138/20%,90/13%	31/0%,52/2%,69/0%	69/28%,140/16%,144/13%	70/1%,89/1%,56/0%	115/17%,138/15%,110/20%	90/1%,9/0%,46/2%	32/66%,94/80%,125/72%
chr4A_163818861	TraesCS4A02G126700		OsCam1-3	Calmodulin-1	4	Four common	130/0%,33/0%,91/0%	176/23%,161/32%,101/25%	33/0%,50/0%,70/0%	94/43%,180/32%,177/26%	70/0%,97/0%,56/0%	130/25%,165/27%,149/36%	88/0%,12/0%,50/0%	46/72%,162/83%,240/85%
chr4A_163818870	TraesCS4A02G126700		OsCam1-3	Calmodulin-1	4	Four common	132/0%,30/0%,87/0%	173/23%,166/30%,107/21%	34/0%,53/0%,71/0%	94/39%,177/31%,183/25%	66/0%,93/0%,57/0%	133/23%,170/26%,151/34%	82/0%,12/0%,51/0%	44/73%,157/83%,239/85%
chr4A_163818872	TraesCS4A02G126700		OsCam1-3	Calmodulin-1	4	Four common	132/0%,30/0%,84/0%	179/22%,175/28%,107/21%	34/0%,59/0%,71/0%	99/37%,178/30%,188/24%	65/0%,95/0%,57/0%	139/22%,176/25%,160/33%	82/0%,12/0%,52/0%	46/70%,168/78%,258/79%
chr4A_163818874	TraesCS4A02G126700		OsCam1-3	Calmodulin-1	4	Four common	134/1%,30/0%,84/0%	179/23%,178/30%,109/23%	35/0%,60/0%,72/0%	99/38%,181/30%,192/25%	67/0%,95/0%,58/0%	141/24%,177/25%,160/35%	82/0%,12/0%,52/0%	46/72%,169/81%,258/81%
chr4A_163818882	TraesCS4A02G126700		OsCam1-3	Calmodulin-1	4	Four common	131/0%,31/0%,86/0%	183/28%,178/34%,110/29%	33/0%,60/0%,74/0%	105/43%,198/37%,205/30%	64/0%,92/0%,57/0%	152/28%,186/31%,175/39%	81/0%,12/0%,54/0%	53/75%,190/84%,302/86%
chr4A_163818906	TraesCS4A02G126700		OsCam1-3	Calmodulin-1	4	Four common	102/0%,19/0%,68/3%	152/28%,148/40%,98/34%	20/0%,59/0%,68/0%	82/44%,183/40%,183/32%	36/0%,82/0%,57/0%	134/31%,161/35%,167/42%	59/0%,15/0%,54/0%	49/71%,156/85%,281/87%
chr4A_163819011	TraesCS4A02G126700		OsCam1-3	Calmodulin-1	4	Four common	93/0%,27/0%,96/0%	176/29%,186/33%,90/38%	20/0%,64/0%,61/0%	83/51%,204/38%,236/25%	48/0%,77/0%,48/0%	156/35%,169/37%,154/49%	85/0%,12/0%,50/0%	58/72%,158/82%,297/82%
chr4A_163819014	TraesCS4A02G126700		OsCam1-3	Calmodulin-1	4	Four common	93/0%,27/4%,99/0%	179/29%,190/33%,94/36%	21/0%,66/0%,64/0%	84/51%,207/38%,237/25%	50/0%,81/0%,49/0%	163/33%,168/38%,157/48%	88/0%,11/0%,49/0%	59/71%,159/81%,295/83%
chr4A_163819026	TraesCS4A02G126700		OsCam1-3	Calmodulin-1	4	Four common	99/0%,32/0%,103/0%	190/28%,202/32%,100/36%	24/0%,69/0%,64/0%	86/53%,226/35%,254/26%	58/0%,94/0%,60/0%	174/31%,172/38%,170/45%	89/0%,13/0%,47/0%	63/70%,166/81%,300/86%
chr4A_163819029	TraesCS4A02G126700		OsCam1-3	Calmodulin-1	4	Four common	104/0%,34/0%,118/0%	199/27%,225/28%,108/33%	27/0%,70/0%,68/0%	89/52%,242/33%,277/24%	63/0%,97/0%,73/1%	179/30%,193/33%,187/41%	92/0%,13/0%,52/0%	65/68%,171/78%,310/84%
chr4A_163819041	TraesCS4A02G126700		OsCam1-3	Calmodulin-1	4	Four common	108/0%,38/0%,140/0%	206/26%,225/24%,130/27%	32/0%,73/0%,90/0%	95/47%,291/27%,312/21%	70/0%,104/0%,96/0%	191/28%,235/27%,213/36%	99/0%,13/0%,61/0%	66/67%,177/75%,319/79%
chr4A_469102263	TraesCS4A02G190500	TraesCS4A02G190500.1	OsRPS16B	-	4	Four common	284/0%,62/0%,175/0%	340/24%,217/30%,144/20%	53/0%,210/0%,184/0%	73/19%,307/17%,458/16%	74/0%,150/0%,51/0%	237/35%,196/38%,163/53%	155/0%,22/0%,143/0%	61/56%,182/80%,291/76%
chr4A_469102264	TraesCS4A02G190500		OsRPS16B	-	4	Four common	273/0%,61/0%,171/0%	333/24%,214/30%,141/20%	53/0%,205/0%,179/1%	72/19%,306/17%,453/16%	74/0%,149/0%,51/0%	234/35%,196/38%,163/53%	149/0%,23/0%,141/0%	61/56%,182/80%,290/76%
chr4A_469102283	TraesCS4A02G190500		OsRPS16B	-	4	Four common	249/0%,50/0%,150/0%	321/25%,190/33%,128/22%	45/0%,186/0%,155/1%	67/19%,278/18%,407/16%	73/0%,132/0%,47/0%	214/38%,186/39%,150/45%	130/0%,20/0%,121/0%	62/60%,175/79%,273/79%
chr4B_168566902	TraesCS4B02G128700	TraesCS4B02G128700.1	AtRPL8A	-	2	Four common	225/3%,277/0%,359/0%	385/16%,606/37%,556/45%	528/0%,277/0%,338/0%	294/25%,350/36%,338/26%	177/0%,171/2%,179/0%	359/17%,431/13%,326/23%	94/0%,108/0%,186/0%	111/55%,286/63%,599/70%
chr4B_390280808	TraesCS4B02G178200	TraesCS4B02G178200.1	TaCaM1-1	-	4	Four common	282/0%,77/0%,222/0%	487/24%,426/15%,240/23%	46/0%,129/0%,123/0%	231/37%,357/17%,467/12%	184/0%,254/0%,122/0%	341/28%,340/19%,378/19%	179/0%,15/0%,111/0%	189/89%,327/80%,348/72%
chr4B_390280829	TraesCS4B02G178200		TaCaM1-1	-	4	Four common	266/0%,84/0%,210/0%	490/28%,402/19%,229/28%	45/0%,144/0%,112/0%	229/41%,337/20%,440/15%	176/0%,259/0%,107/0%	349/30%,327/22%,366/23%	181/1%,14/7%,93/0%	222/90%,368/84%,395/78%
chr4B_390280835	TraesCS4B02G178200		TaCaM1-1	-	4	Four common	257/0%,78/1%,217/0%	476/28%,396/19%,229/28%	42/0%,138/0%,110/0%	226/42%,329/20%,441/15%	173/0%,245/0%,104/0%	343/31%,330/22%,356/24%	178/0%,11/0%,95/0%	222/90%,375/83%,395/78%
chr4B_390280839	TraesCS4B02G178200		TaCaM1-1	-	4	Four common	245/1%,76/0%,212/1%	458/30%,383/20%,222/29%	39/0%,133/2%,105/1%	220/43%,321/21%,425/15%	165/1%,234/1%,102/0%	337/32%,328/22%,346/25%	164/1%,10/0%,89/0%	222/90%,374/83%,394/77%
chr4B_390280840	TraesCS4B02G178200		TaCaM1-1	-	4	Four common	244/1%,76/0%,207/0%	451/30%,382/20%,220/29%	39/0%,133/1%,104/0%	220/44%,321/21%,423/16%	165/1%,232/0%,102/0%	337/31%,327/23%,340/25%	165/1%,10/0%,89/0%	222/90%,374/82%,393/78%
chr4B_390280862	TraesCS4B02G178200		TaCaM1-1	-	4	Four common	203/0%,62/0%,177/1%	382/35%,321/24%,193/33%	40/0%,108/0%,91/0%	200/48%,266/25%,352/18%	137/1%,176/0%,86/0%	293/35%,285/26%,289/29%	136/1%,6/0%,61/0%	217/92%,374/84%,387/80%
chr4B_390280871	TraesCS4B02G178200		TaCaM1-1	-	4	Four common	194/0%,62/0%,183/0%	344/29%,304/22%,195/28%	45/0%,106/0%,97/0%	183/40%,268/22%,368/17%	133/0%,174/0%,96/1%	266/29%,302/25%,288/29%	130/0%,5/0%,65/0%	167/90%,319/81%,322/76%
chr4B_390280873	TraesCS4B02G178200		TaCaM1-1	-	4	Four common	199/0%,63/0%,186/0%	345/28%,312/22%,198/27%	46/1%,107/0%,100/0%	187/39%,272/22%,374/17%	135/0%,174/0%,98/0%	266/29%,308/24%,297/27%	133/0%,5/0%,69/0%	162/90%,320/81%,321/76%
chr4B_390280875	TraesCS4B02G178200		TaCaM1-1	-	4	Four common	197/0%,63/0%,188/0%	349/28%,318/22%,199/27%	45/0%,107/0%,100/0%	184/40%,274/22%,374/17%	137/0%,174/0%,99/0%	265/28%,311/24%,297/27%	136/0%,5/0%,70/0%	162/90%,322/80%,324/75%
chr4B_390280883	TraesCS4B02G178200		TaCaM1-1	-	4	Four common	193/0%,63/0%,191/0%	335/29%,320/20%,197/27%	45/0%,110/0%,97/0%	181/38%,269/22%,377/16%	136/0%,177/0%,103/0%	257/28%,313/23%,299/26%	139/0%,7/0%,69/0%	159/88%,315/79%,319/76%
chr4D_124260478	TraesCS4D02G140800	TraesCS4D02G140800.1	OsHSP70	-	4	Four common	928/0%,413/1%,884/0%	693/20%,828/21%,576/17%	614/0%,570/1%,880/0%	449/14%,672/17%,1008/15%	510/0%,796/0%,708/0%	828/30%,801/34%,972/33%	521/0%,51/0%,448/0%	289/94%,822/96%,1102/91%
chr4D_124260481	TraesCS4D02G140800		OsHSP70	-	4	Four common	921/0%,405/0%,875/0%	695/20%,826/21%,574/17%	624/0%,567/0%,870/0%	449/14%,671/17%,1000/15%	507/0%,795/0%,709/0%	820/31%,801/34%,965/34%	511/0%,50/0%,442/0%	294/94%,831/96%,1111/91%
chr4D_124260511	TraesCS4D02G140800		OsHSP70	-	4	Four common	859/0%,392/0%,771/0%	651/19%,794/21%,557/17%	600/0%,532/0%,824/0%	431/13%,634/18%,931/16%	498/0%,774/0%,671/0%	755/28%,770/37%,937/35%	502/0%,50/0%,434/0%	245/94%,806/95%,1088/91%
chr4D_124260515	TraesCS4D02G140800		OsHSP70	-	4	Four common	849/0%,388/0%,758/0%	613/15%,776/22%,546/17%	606/0%,523/0%,802/0%	408/9%,624/17%,904/17%	491/0%,770/0%,659/0%	702/23%,751/38%,920/35%	493/0%,49/0%,426/0%	205/93%,784/95%,1067/91%
chr4D_124260520	TraesCS4D02G140800		OsHSP70	-	4	Four common	857/0%,382/0%,767/0%	620/15%,786/21%,549/17%	600/0%,515/0%,806/0%	399/9%,622/17%,920/16%	489/0%,760/0%,681/0%	697/23%,760/37%,924/34%	502/0%,52/0%,432/0%	205/93%,781/94%,1053/91%
chr4D_355859968	TraesCS4D02G207500	TraesCS4D02G207500.1	OsHsp71.1	-	4	Four common	302/0%,79/0%,257/0%	950/12%,819/13%,276/13%	50/0%,188/0%,346/0%	182/18%,546/10%,811/8%	162/0%,209/0%,96/0%	635/20%,497/19%,700/18%	266/0%,31/0%,204/0%	183/70%,534/61%,896/55%
chr4D_355860059	TraesCS4D02G207500		OsHsp71.1	-	4	Four common	394/0%,135/0%,372/0%	1209/13%,1188/14%,493/16%	127/0%,252/0%,548/0%	299/18%,735/12%,1078/10%	255/0%,312/0%,219/0%	863/20%,747/28%,1134/20%	372/0%,42/0%,286/0%	317/67%,1169/65%,1335/54%
chr4D_355860061	TraesCS4D02G207500		OsHsp71.1	-	4	Four common	383/0%,136/0%,370/0%	1177/13%,1184/14%,494/15%	126/0%,252/0%,554/0%	292/19%,729/12%,1075/11%	248/0%,308/0%,218/0%	845/20%,744/29%,1131/20%	361/0%,40/0%,286/0%	314/67%,1169/65%,1333/54%
chr4D_355860064	TraesCS4D02G207500		OsHsp71.1	-	4	Four common	384/0%,129/0%,377/0%	1148/14%,1168/14%,482/16%	127/0%,247/0%,552/0%	274/20%,713/12%,1046/11%	242/0%,295/0%,218/0%	817/21%,728/30%,1107/21%	356/0%,37/0%,284/0%	289/74%,1028/74%,1237/60%
chr4D_355860084	TraesCS4D02G207500		OsHsp71.1	-	4	Four common	292/0%,96/3%,352/0%	909/18%,1110/15%,454/18%	87/2%,192/0%,546/0%	210/27%,671/15%,989/12%	191/0%,225/0%,206/0%	677/26%,679/32%,1067/22%	251/0%,31/0%,282/0%	265/77%,986/76%,1180/63%
chr4D_355860088	TraesCS4D02G207500		OsHsp71.1	-	4	Four common	290/0%,93/0%,334/0%	882/18%,1035/15%,424/16%	83/0%,179/0%,513/0%	207/28%,635/13%,933/11%	192/0%,220/0%,199/0%	662/27%,641/32%,1013/21%	246/0%,30/0%,271/0%	265/77%,909/76%,1108/63%
chr4D_483138160	TraesCS4D02G319400	TraesCS4D02G319400.1	AtGAPB	Glyceraldehyde-3-phosphate dehydrogenase GAPB, chloroplastic	4	Four common	582/0%,135/0%,420/0%	295/23%,183/10%,125/4%	124/0%,512/0%,495/0%	107/15%,314/2%,498/4%	228/0%,325/0%,178/0%	338/27%,243/5%,196/9%	421/0%,73/0%,526/0%	64/88%,67/51%,78/62%
chr5A_86181601	TraesCS5A02G073800	TraesCS5A02G073800.1	-	-	4	Four common	217/0%,77/0%,193/0%	937/59%,1290/59%,810/65%	103/0%,149/0%,125/0%	655/62%,1205/65%,1372/56%	123/0%,221/0%,218/0%	861/68%,1093/68%,1244/68%	58/0%,5/0%,64/0%	723/97%,2082/94%,2482/92%
chr5A_86181610	TraesCS5A02G073800		-	-	2	Four common	143/10%,167/0%,303/0%	368/23%,1088/54%,1037/47%	289/0%,132/1%,304/1%	690/62%,941/61%,516/51%	225/0%,179/0%,215/0%	442/49%,619/43%,474/56%	71/0%,129/0%,136/12%	205/78%,878/83%,1325/79%
chr5A_86181610	TraesCS5A02G073800		-	-	4	Four common	238/0%,84/0%,250/0%	991/60%,1482/58%,935/63%	113/0%,152/0%,171/0%	682/61%,1381/63%,1578/54%	128/0%,226/0%,279/0%	918/69%,1240/67%,1433/67%	66/0%,4/0%,80/0%	779/97%,2372/93%,2816/91%
chr5B_530613607	TraesCS5B02G349100	TraesCS5B02G349100.1	-	Histone H4 variant TH011	4	Four common	646/0%,147/0%,326/0%	540/17%,474/22%,296/28%	58/0%,349/0%,309/0%	233/24%,453/25%,606/15%	229/0%,325/0%,137/0%	396/26%,471/38%,324/46%	291/0%,44/0%,273/0%	101/74%,377/82%,471/77%
chr5B_530613610	TraesCS5B02G349100		-	Histone H4 variant TH011	4	Four common	673/0%,149/0%,325/0%	563/17%,475/24%,295/30%	54/0%,367/0%,314/0%	229/25%,474/25%,635/15%	230/0%,330/0%,125/0%	407/26%,484/40%,337/49%	302/0%,45/0%,282/0%	101/74%,398/82%,494/79%
chr5B_530613619	TraesCS5B02G349100		-	Histone H4 variant TH011	4	Four common	736/0%,141/0%,316/0%	592/17%,475/27%,296/34%	46/0%,376/0%,325/0%	227/26%,485/27%,654/18%	234/0%,325/0%,110/0%	430/26%,486/43%,360/52%	320/0%,49/0%,279/0%	114/75%,440/85%,545/80%
chr5B_530613628	TraesCS5B02G349100		-	Histone H4 variant TH011	4	Four common	696/0%,121/0%,301/1%	562/18%,442/31%,287/38%	10/0%,358/0%,313/0%	191/33%,486/30%,657/19%	202/0%,303/0%,85/1%	400/29%,486/47%,341/57%	297/0%,51/2%,270/0%	114/75%,459/86%,571/82%
chr5B_530613631	TraesCS5B02G349100		-	Histone H4 variant TH011	4	Four common	690/0%,117/0%,308/0%	558/19%,440/31%,287/39%	8/0%,359/0%,319/0%	188/32%,489/30%,667/19%	197/0%,293/0%,84/0%	396/29%,486/47%,343/57%	296/0%,50/0%,273/0%	112/77%,459/86%,569/82%
chr5B_530613640	TraesCS5B02G349100		-	Histone H4 variant TH011	4	Four common	656/0%,106/0%,313/0%	528/20%,442/30%,283/38%	6/0%,331/0%,326/0%	162/36%,497/29%,671/18%	171/0%,256/0%,82/0%	353/30%,487/45%,343/54%	264/0%,47/0%,276/0%	106/79%,451/86%,559/81%
chr5B_530613646	TraesCS5B02G349100		-	Histone H4 variant TH011	4	Four common	643/0%,103/0%,316/0%	500/17%,436/27%,273/34%	4/0%,326/0%,336/0%	137/30%,476/26%,681/16%	162/0%,242/0%,84/0%	319/26%,459/41%,316/49%	260/0%,43/0%,284/0%	90/78%,408/85%,505/79%
chr5B_530613650	TraesCS5B02G349100		-	Histone H4 variant TH011	4	Four common	624/0%,101/0%,306/0%	493/17%,423/27%,270/35%	4/0%,313/0%,332/0%	132/31%,473/26%,679/16%	152/0%,229/0%,84/0%	313/27%,454/41%,312/50%	250/0%,44/0%,279/0%	89/79%,406/85%,504/79%
chr5B_530613653	TraesCS5B02G349100		-	Histone H4 variant TH011	4	Four common	626/0%,97/0%,304/0%	492/17%,416/28%,267/34%	5/0%,308/0%,326/0%	132/31%,480/25%,676/16%	150/0%,227/0%,84/0%	308/27%,450/42%,306/51%	243/0%,45/0%,275/0%	89/79%,406/85%,503/79%
chr5B_530613655	TraesCS5B02G349100		-	Histone H4 variant TH011	4	Four common	620/0%,92/0%,300/0%	488/17%,413/28%,263/35%	5/0%,306/0%,321/0%	129/32%,475/26%,669/16%	148/0%,227/0%,83/0%	309/27%,445/42%,303/51%	239/0%,45/0%,273/0%	89/79%,407/85%,504/79%
chr5B_530613658	TraesCS5B02G349100		-	Histone H4 variant TH011	4	Four common	610/0%,89/0%,290/0%	486/17%,399/29%,257/36%	5/0%,303/0%,316/0%	130/32%,470/26%,661/17%	147/0%,224/0%,78/0%	308/28%,438/43%,297/53%	240/0%,45/0%,266/0%	92/79%,410/85%,503/80%
chr5B_530613679	TraesCS5B02G349100		-	Histone H4 variant TH011	4	Four common	470/0%,37/0%,162/1%	457/27%,312/39%,181/61%	5/0%,211/0%,198/0%	149/50%,410/32%,562/22%	76/0%,109/0%,33/0%	309/46%,406/54%,277/64%	163/1%,29/0%,172/0%	172/63%,681/61%,731/64%
chr6A_91424433	TraesCS6A02G119800	TraesCS6A02G119800.1	OsEXO70G1	-	4	Four common	529/0%,187/1%,387/0%	1643/67%,1910/73%,1496/74%	215/0%,255/0%,304/1%	1210/78%,1799/79%,1937/71%	315/0%,482/0%,360/0%	1386/84%,1718/84%,1862/83%	265/0%,29/0%,220/0%	1681/98%,3548/96%,3908/94%
chr6A_91424439	TraesCS6A02G119800		OsEXO70G1	-	4	Four common	566/0%,200/2%,395/4%	1676/66%,1954/74%,1522/75%	226/0%,267/0%,314/0%	1226/77%,1843/79%,1976/72%	333/0%,526/0%,374/5%	1396/83%,1746/84%,1903/83%	277/0%,30/0%,226/6%	1693/97%,3636/96%,4003/94%
chr6A_91424451	TraesCS6A02G119800		OsEXO70G1	-	4	Four common	541/2%,188/1%,397/6%	1509/64%,2045/74%,1594/75%	211/0%,252/1%,320/6%	1082/76%,1924/80%,2065/73%	315/2%,486/1%,379/6%	1225/81%,1812/85%,1998/84%	275/3%,30/7%,230/8%	1468/97%,3750/97%,4136/95%
chr6A_91424479	TraesCS6A02G119700	TraesCS6A02G119700.1	rubi3	Polyubiquitin	4	Four common	691/2%,242/1%,483/6%	1485/54%,1990/62%,1473/65%	233/0%,328/0%,397/1%	984/68%,1786/71%,1959/63%	383/0%,585/0%,439/0%	1140/72%,1639/78%,1822/74%	345/0%,36/0%,258/0%	1229/96%,3181/95%,3540/92%
chr6A_91424508	TraesCS6A02G119700		rubi3	Polyubiquitin	4	Four common	743/11%,276/14%,416/13%	979/36%,1103/49%,751/49%	238/13%,342/10%,338/13%	518/47%,869/56%,1048/50%	389/13%,657/12%,361/17%	573/45%,743/68%,818/61%	393/0%,42/0%,209/0%	399/87%,1106/88%,1274/83%
chr6B_149055266	TraesCS6B02G148000	TraesCS6B02G148000.1	UBQ11	Polyubiquitin	4	Four common	91/0%,28/0%,79/0%	254/68%,214/31%,141/44%	21/0%,39/0%,131/0%	144/71%,202/53%,209/42%	128/0%,253/0%,169/0%	330/44%,225/32%,303/32%	164/0%,15/0%,139/0%	195/90%,338/82%,468/60%
chr6B_149055289	TraesCS6B02G148000		UBQ11	Polyubiquitin	4	Four common	104/0%,32/0%,88/0%	259/63%,225/28%,149/39%	25/0%,44/0%,154/0%	140/66%,207/49%,222/37%	164/0%,329/0%,213/0%	370/36%,258/26%,342/25%	194/0%,21/0%,166/0%	186/84%,319/77%,465/53%
chr6B_149055310	TraesCS6B02G148000		UBQ11	Polyubiquitin	4	Four common	107/3%,34/0%,95/0%	155/39%,234/26%,148/35%	27/0%,42/0%,175/0%	80/45%,207/43%,230/35%	171/1%,349/2%,261/1%	304/20%,305/23%,375/24%	206/2%,22/0%,190/0%	96/70%,291/72%,478/47%
chr6B_149055802	TraesCS6B02G148000		UBQ11	Polyubiquitin	4	Four common	35/0%,11/0%,23/0%	248/79%,299/86%,189/91%	20/0%,23/0%,72/0%	75/72%,274/89%,222/91%	136/0%,160/0%,108/0%	307/52%,363/66%,431/70%	118/0%,21/0%,117/0%	287/93%,851/92%,1083/90%
chr6B_171728092	TraesCS6B02G164600	TraesCS6B02G164600.1	rubq2	-	4	Four common	492/0%,190/0%,522/0%	722/23%,1037/19%,570/20%	154/0%,238/0%,494/0%	372/32%,782/30%,993/19%	279/0%,413/0%,329/0%	508/33%,570/37%,749/28%	325/0%,35/0%,327/0%	278/88%,791/77%,1115/68%
chr6B_171728107	TraesCS6B02G164600		rubq2	-	4	Four common	558/1%,206/0%,506/2%	825/22%,995/21%,564/21%	167/0%,261/0%,472/0%	411/31%,775/31%,959/21%	308/0%,463/1%,311/2%	557/33%,553/41%,721/31%	388/0%,43/0%,334/2%	309/87%,821/77%,1138/70%
chr6B_55694957	TraesCS6B02G079200	TraesCS6B02G079200.1	-	Histone H4 variant TH011	4	Four common	93/0%,8/0%,37/0%	270/16%,159/40%,64/55%	6/0%,40/0%,33/0%	65/32%,159/48%,271/28%	22/0%,37/0%,13/0%	89/71%,101/89%,101/90%	26/0%,1/0%,16/0%	99/44%,266/56%,347/56%
chr6B_55694969	TraesCS6B02G079200		-	Histone H4 variant TH011	4	Four common	109/0%,8/0%,37/0%	305/15%,167/39%,61/57%	4/0%,53/0%,37/0%	65/34%,165/47%,280/28%	21/0%,38/0%,9/0%	88/72%,107/88%,100/91%	32/0%,2/0%,18/0%	104/43%,279/54%,366/54%
chr6B_55694978	TraesCS6B02G079200		-	Histone H4 variant TH011	4	Four common	124/0%,10/0%,36/3%	332/14%,178/37%,63/56%	1/0%,55/0%,40/0%	65/34%,182/42%,309/25%	18/0%,46/0%,6/0%	90/70%,111/85%,102/90%	36/0%,2/0%,15/0%	108/42%,300/51%,375/53%
chr6B_55695035	TraesCS6B02G079200		-	Histone H4 variant TH011	4	Four common	142/1%,16/0%,34/0%	362/22%,278/40%,123/64%	6/0%,64/0%,62/0%	76/70%,264/47%,443/27%	12/0%,53/0%,6/0%	151/83%,214/83%,185/91%	43/0%,1/0%,12/0%	128/55%,509/54%,676/58%
chr6B_55695203	TraesCS6B02G079200		-	Histone H4 variant TH011	4	Four common	105/0%,8/0%,42/0%	341/21%,259/30%,121/58%	2/0%,70/0%,61/0%	69/57%,278/30%,414/24%	35/0%,49/0%,6/0%	165/59%,170/72%,162/78%	30/0%,8/0%,23/0%	113/42%,431/41%,501/53%
chr6B_55695212	TraesCS6B02G079200		-	Histone H4 variant TH011	4	Four common	121/0%,12/0%,42/0%	374/20%,260/32%,119/60%	2/0%,80/0%,61/0%	85/48%,279/32%,403/25%	50/0%,60/0%,6/0%	186/57%,180/74%,164/78%	32/0%,11/0%,23/0%	125/41%,436/42%,514/54%
chr6B_55695224	TraesCS6B02G079200		-	Histone H4 variant TH011	4	Four common	126/0%,13/0%,42/0%	359/11%,223/27%,91/49%	4/0%,87/0%,58/0%	71/32%,249/27%,333/19%	55/0%,66/0%,8/0%	170/44%,146/70%,133/73%	33/0%,12/0%,23/0%	117/31%,390/37%,448/50%
chr6B_55695227	TraesCS6B02G079200		-	Histone H4 variant TH011	4	Four common	125/0%,15/0%,42/0%	363/11%,223/27%,91/49%	4/0%,86/0%,57/0%	71/32%,253/26%,337/19%	57/0%,66/0%,10/0%	170/44%,144/70%,133/72%	33/0%,12/0%,23/0%	117/31%,394/37%,450/50%
chr6B_55695233	TraesCS6B02G079200		-	Histone H4 variant TH011	4	Four common	120/0%,15/0%,40/0%	340/12%,221/27%,93/48%	4/0%,81/0%,55/0%	71/32%,250/27%,334/19%	57/0%,67/0%,8/0%	165/45%,144/71%,133/73%	31/0%,12/0%,23/0%	114/32%,390/37%,448/50%
chr6B_92532418	TraesCS6B02G110300	TraesCS6B02G110300.1	-	-	4	Four common	307/0%,128/0%,321/0%	709/31%,750/28%,572/39%	113/0%,188/0%,308/0%	373/23%,584/33%,693/19%	177/0%,251/0%,271/0%	536/39%,692/54%,797/47%	174/1%,29/0%,217/0%	285/85%,980/81%,1446/76%
chr6D_470684693	TraesCS6D02G401900	TraesCS6D02G401900.1	EIF4A3A	Eukaryotic initiation factor 4A-III homolog A	4	Four common	221/1%,71/0%,182/0%	250/22%,228/31%,165/27%	134/1%,155/0%,118/0%	180/35%,218/25%,335/22%	141/0%,209/0%,181/0%	219/41%,298/56%,268/43%	64/0%,7/0%,59/0%	105/85%,342/93%,391/89%
chr6D_470684697	TraesCS6D02G401900		EIF4A3A	Eukaryotic initiation factor 4A-III homolog A	4	Four common	216/0%,69/0%,169/0%	244/23%,239/35%,174/30%	127/0%,141/1%,115/1%	176/36%,215/27%,331/26%	140/0%,202/0%,175/0%	209/43%,315/59%,271/48%	64/0%,7/0%,56/0%	105/86%,366/94%,422/91%
chr7A_77150114	TraesCS7A02G119700	TraesCS7A02G119700.1	-	Histone H3	4	Four common	70/0%,18/0%,18/0%	60/7%,41/27%,21/29%	5/0%,28/0%,19/0%	20/10%,50/24%,79/10%	15/0%,44/0%,12/0%	52/15%,44/41%,28/36%	32/0%,2/0%,17/0%	7/100%,39/100%,38/95%
chr7A_77150123	TraesCS7A02G119700		-	Histone H3	4	Four common	67/0%,18/0%,18/0%	88/10%,43/30%,21/33%	5/0%,28/0%,18/0%	20/10%,53/32%,78/15%	17/0%,42/0%,12/0%	63/27%,45/47%,30/47%	32/0%,2/0%,17/0%	10/100%,45/100%,52/96%
chr7A_77150129	TraesCS7A02G119700		-	Histone H3	4	Four common	64/0%,15/0%,14/0%	89/10%,43/30%,21/33%	2/0%,27/0%,16/0%	20/10%,52/33%,77/12%	17/0%,42/0%,8/0%	65/26%,45/47%,30/47%	32/0%,2/0%,17/0%	10/100%,45/100%,52/96%
chr7A_77150138	TraesCS7A02G119700		-	Histone H3	4	Four common	63/0%,14/0%,14/0%	95/9%,43/30%,21/33%	2/0%,28/0%,16/0%	20/10%,50/34%,88/10%	16/0%,41/0%,6/0%	65/26%,46/46%,30/47%	32/0%,2/0%,17/0%	10/100%,45/100%,52/96%
chr7A_77150263	TraesCS7A02G119700		-	Histone H3	4	Four common	188/0%,31/0%,72/0%	175/57%,324/86%,189/90%	28/0%,127/1%,91/0%	63/71%,285/74%,427/62%	20/0%,64/0%,33/0%	216/71%,474/91%,523/94%	65/0%,8/0%,51/0%	121/99%,749/99%,999/99%
chr7A_77150321	TraesCS7A02G119700		-	Histone H3	4	Four common	207/0%,34/0%,106/0%	421/79%,443/88%,271/92%	27/0%,141/1%,115/0%	187/91%,403/74%,545/70%	14/0%,86/0%,48/0%	526/88%,703/94%,750/96%	73/0%,7/0%,78/0%	417/100%,1151/100%,1536/100%
chr7A_77150327	TraesCS7A02G119700		-	Histone H3	4	Four common	224/0%,34/0%,103/0%	422/79%,436/88%,266/93%	25/0%,146/0%,113/0%	183/92%,391/76%,520/71%	14/0%,87/0%,47/0%	522/89%,691/94%,740/96%	72/0%,9/0%,81/0%	416/100%,1136/100%,1511/100%
chr7A_77150330	TraesCS7A02G119700		-	Histone H3	4	Four common	226/0%,36/0%,105/0%	422/79%,437/88%,267/92%	25/0%,147/0%,114/0%	183/92%,393/75%,522/71%	14/0%,87/0%,47/0%	525/89%,693/94%,740/96%	73/0%,9/0%,82/0%	416/100%,1136/100%,1511/100%
chr7A_77150343	TraesCS7A02G119700		-	Histone H3	4	Four common	211/0%,34/0%,122/1%	368/74%,392/85%,229/90%	23/4%,134/1%,132/2%	146/91%,363/72%,487/64%	13/0%,86/0%,44/0%	453/86%,589/92%,617/94%	80/0%,9/0%,88/0%	335/100%,931/100%,1271/100%
chr7A_77150345	TraesCS7A02G119700		-	Histone H3	4	Four common	206/0%,34/0%,116/0%	361/75%,389/84%,228/91%	17/0%,132/0%,132/0%	145/92%,361/72%,481/64%	12/0%,83/0%,44/0%	447/87%,580/92%,609/94%	80/0%,9/0%,89/0%	333/100%,918/100%,1258/100%
chr7A_77150348	TraesCS7A02G119700		-	Histone H3	4	Four common	206/0%,35/0%,116/0%	360/75%,391/84%,228/91%	17/0%,127/0%,138/0%	148/90%,368/71%,494/62%	13/0%,84/0%,46/0%	444/87%,584/92%,611/94%	81/0%,9/0%,90/0%	333/100%,918/100%,1258/100%
chr7A_77150474	TraesCS7A02G119700		-	Histone H3	4	Four common	113/0%,24/0%,71/0%	67/48%,75/37%,50/42%	19/0%,70/0%,46/0%	27/59%,88/33%,131/22%	22/0%,48/0%,44/0%	82/63%,104/71%,94/80%	41/0%,2/0%,32/0%	24/100%,77/92%,131/99%
chr1A_362209999	TraesCS1A02G201300	TraesCS1A02G201300.1	-	Histone H4 variant TH011	4	Three common	136/0%,18/0%,41/0%	157/32%,160/64%,96/77%	15/0%,121/0%,62/0%	44/64%,174/56%,285/39%	30/0%,60/0%,28/0%	111/49%,183/77%,178/84%	-	-
chr1A_362210008	TraesCS1A02G201300		-	Histone H4 variant TH011	4	Three common	140/0%,19/0%,41/0%	171/29%,166/63%,96/77%	15/0%,129/0%,62/0%	45/64%,179/55%,302/37%	30/0%,67/0%,28/0%	120/47%,184/76%,178/85%	-	-
chr1A_362210017	TraesCS1A02G201300		-	Histone H4 variant TH011	4	Three common	148/0%,19/0%,41/0%	159/26%,160/60%,96/77%	15/0%,134/0%,64/0%	43/64%,176/54%,300/36%	29/0%,67/0%,28/0%	107/38%,178/75%,172/84%	-	-
chr1A_362210018	TraesCS1A02G201300		-	Histone H4 variant TH011	4	Three common	146/0%,19/5%,41/0%	159/26%,160/60%,96/77%	15/0%,132/0%,64/0%	43/63%,176/54%,299/36%	28/0%,67/0%,28/0%	106/39%,178/75%,172/84%	-	-
chr1A_362210019	TraesCS1A02G201300		-	Histone H4 variant TH011	4	Three common	148/0%,19/0%,41/0%	160/26%,160/60%,96/77%	15/0%,131/0%,64/0%	43/63%,176/54%,298/36%	27/0%,67/0%,28/0%	106/39%,178/75%,174/83%	-	-
chr1A_362210030	TraesCS1A02G201300		-	Histone H4 variant TH011	4	Three common	133/1%,19/0%,39/0%	160/74%,160/40%,92/20%	15/0%,137/1%,68/0%	43/65%,178/54%294/36%	26/0%,66/0%,26/0%	106/41%,176/76%,174/85%	-	-
chr1A_362210035	TraesCS1A02G201300		-	Histone H4 variant TH011	4	Three common	132/0%,17/0%,39/0%	155/27%,163/59%,92/50%	15/0%,134/1%,68/0%	43/63%,179/53%294/36%	26/0%,66/0%,26/0%	107/38%,177/75%,174/84%	-	-
chr1A_362210038	TraesCS1A02G201300		-	Histone H4 variant TH011	4	Three common	133/0%,17/0%,39/0%	154/27%,163/59%,92/80%	15/0%,132/1%,67/0%	43/63%,177/54%294/36%	26/0%,66/0%,26/0%	105/39%,177/75%,173/84%	-	-
chr1A_362210041	TraesCS1A02G201300		-	Histone H4 variant TH011	4	Three common	133/0%,17/0%,38/0%	161/26%,162/60%,92/80%	15/0%,131/1%,66/0%	41/68%,179/54%,295/36%	26/0%,66/0%,26/0%	106/40%,179/74%,173/86%	-	-
chr1A_362210044	TraesCS1A02G201300		-	Histone H4 variant TH011	4	Three common	134/0%,17/0%,38/0%	162/26%,161/58%,92/80%	15/0%,125/1%,67/6%	41/66%,184/51%,295/36%	26/23%,65/17%,26/8%	108/54%,181/77%,175/86%	-	-
chr1A_452020765	TraesCS1A02G258800	TraesCS1A02G258800.1	AtTUBB6	Tubulin beta chain	4	Three common	1080/0%,407/0%,961/0%	388/22%,504/20%,382/23%	454/0%,575/0%,789/0%	356/16%,511/21%,647/18%	688/0%,793/0%,875/0%	607/23%,805/29%,772/32%	-	-
chr1A_452020771	TraesCS1A02G258800		AtTUBB6	Tubulin beta chain	4	Three common	1143/0%,434/0%,1031/0%	421/21%,564/19%,416/21%	484/0%,603/0%,834/0%	386/16%,555/21%,696/18%	702/0%,868/0%,950/0%	645/24%,870/28%,832/31%	-	-
chr1A_452020810	TraesCS1A02G258800		AtTUBB6	Tubulin beta chain	4	Three common	1268/0%,507/0%,937/0%	512/54%,540/21%,376/21%	564/0%,688/0%,731/0%	457/18%,532/23%,672/20%	791/0%,1022/0%,849/0%	796/26%,822/32%,828/32%	-	-
chr1A_452020822	TraesCS1A02G258800		AtTUBB6	Tubulin beta chain	4	Three common	1167/0%,480/0%,856/0%	469/25%,503/20%,350/22%	535/0%,631/0%,660/0%	435/18%,500/24%,629/22%	733/0%,946/0%,777/0%	726/26%,784/33%,782/33%	-	-
chr1B_512174375	TraesCS1B02G294300	TraesCS1B02G294300.1	AtHSP70-4	Heat shock 70 kDa protein 4	4	Three common	572/0%,154/0%,495/0%	786/20%,581/26%,253/39%	85/0%,286/0%,392/0%	122/28%,403/27%,720/26%	241/0%,341/0%,148/0%	425/36%,503/41%,408/50%	-	-
chr1B_512174382	TraesCS1B02G294300		AtHSP70-4	Heat shock 70 kDa protein 4	4	Three common	662/0%,203/0%,562/0%	855/19%,671/23%,294/34%	118/0%,348/0%,489/0%	151/23%,454/24%,782/24%	294/0%,441/0%,219/0%	468/33%,571/38%,479/43%	-	-
chr1B_512174383	TraesCS1B02G294300		AtHSP70-4	Heat shock 70 kDa protein 4	4	Three common	670/0%,202/0%,576/1%	860/19%,691/23%,306/31%	122/1%,354/0%,507/0%	151/23%,464/24%,807/24%	302/0%,447/0%,233/0%	474/33%,581/37%,494/42%	-	-
chr2D_520582908	TraesCS2D02G405500	TraesCS2D02G405500.1	rubi3	Polyubiquitin	4	Three common	44/0%,19/0%,36/0%	291/70%,309/75%,182/79%	24/0%,49/0%,33/44%	147/65%,262/81%,284/60%	34/0%,57/0%,31/0%	303/78%,297/88%,351/85%	-	-
chr2D_520582920	TraesCS2D02G405500		rubi3	Polyubiquitin	4	Three common	46/0%,21/0%,39/0%	381/77%,332/78%,200/77%	22/0%,53/2%,36/0%	196/72%,294/81%,316/60%	32/0%,68/0%,38/0%	407/83%,332/87%,380/85%	-	-
chr2D_520582943	TraesCS2D02G405500		rubi3	Polyubiquitin	4	Three common	71/0%,30/0%,39/0%	471/77%,349/77%,201/87%	22/0%,68/0%,43/0%	249/70%,309/79%,337/58%	52/0%,82/0%,44/0%	513/83%,350/85%,398/84%	-	-
chr3A_56390500	TraesCS3A02G087300	TraesCS3A02G087300.1	OsNADPH1	-	4	Three common	63/0%,11/0%,20/0%	127/20%,70/33%,26/73%	7/0%,22/0%,17/0%	18/44%,43/23%,71/17%	29/0%,48/0%,17/0%	79/46%,63/56%,56/50%	-	-
chr3A_56390503	TraesCS3A02G087300		OsNADPH1	-	4	Three common	63/0%,11/0%,20/0%	133/20%,75/32%,27/74%	7/0%,22/0%,17/0%	18/44%,44/23%,74/16%	31/0%,49/0%,17/0%	79/46%,64/56%,56/50%	-	-
chr3D_18908936	TraesCS3D02G049300	TraesCS3D02G049300.1	-	-	4	Three common	18/0%,8/0%,9/0%	91/38%,93/46%,83/36%	11/0%,8/0%,10/0%	67/49%,87/40%,75/40%	21/0%,20/0%,24/13%	71/44%,60/48%,86/51%	-	-
chr3D_18908941	TraesCS3D02G049300		-	-	4	Three common	18/0%,8/0%,10/0%	89/37%,95/45%,88/34%	11/0%,7/0%,11/0%	64/50%,91/38%,73/40%	21/0%,20/0%,28/11%	70/43%,64/45%,89/49%	-	-
chr3D_18908952	TraesCS3D02G049300		-	-	4	Three common	20/0%,7/0%,10/0%	82/38%,95/44%,85/34%	11/0%,5/0%,14/0%	62/48%,89/36%,72/40%	22/0%,20/0%,28/7%	62/42%,67/42%,89/47%	-	-
chr3D_18908972	TraesCS3D02G049300		-	-	4	Three common	17/0%,8/0%,11/0%	75/32%,88/41%,80/31%	12/0%,6/0%,14/0%	56/45%,78/37%,64/38%	28/0%,15/0%,27/7%	57/37%,61/39%,77/44%	-	-
chr3D_18908979	TraesCS3D02G049300		-	-	4	Three common	17/0%,8/0%,11/0%	75/31%,83/37%,77/32%	10/0%,6/0%,14/0%	55/45%,73/38%,65/37%	27/0%,14/0%,26/4%	58/31%,62/37%,75/43%	-	-
chr4B_513725918	TraesCS4B02G248500	TraesCS4B02G248500.1	OsSEC61	-	4	Three common	109/0%,60/0%,92/0%	160/23%,191/24%,326/6%	167/0%,231/0%,294/0%	164/5%,263/7%,316/10%	68/0%,86/0%,185/0%	113/34%,234/25%,210/39%	-	-
chr5A_86181601	TraesCS5A02G073800	TraesCS5A02G073800.1	-	-	2	Three common	142/11%,146/0%,245/0%	343/23%,924/56%,868/50%	280/0%,125/1%,244/0%	649/62%,789/65%,428/55%	212/0%,169/0%,165/0%	427/48%,524/45%,405/60%	-	-
chr5A_86181649	TraesCS5A02G073800		-	-	2	Three common	169/7%,212/0%,318/0%	391/14%,1126/54%,1085/46%	370/0%,179/0%,321/1%	631/45%,971/61%,551/50%	260/0%,238/0%,233/0%	399/37%,686/40%,481/57%	-	-
chr5A_86181650	TraesCS5A02G073800		-	-	2	Three common	168/7%,212/0%,318/0%	393/15%,1109/53%,1075/46%	371/0%,179/0%,321/1%	633/45%,963/61%,547/49%	262/0%,238/0%,234/0%	400/38%,682/39%,480/57%	-	-
chr5A_86181651	TraesCS5A02G073800		-	-	2	Three common	169/7%,217/0%,317/0%	394/14%,1110/53%,1072/46%	374/0%,178/0%,322/2%	635/45%,957/61%,546/49%	262/1%,239/0%,233/0%	401/38%,682/40%,478/57%	-	-
chr5A_86181655	TraesCS5A02G073800		-	-	2	Three common	161/7%,204/0%,316/0%	376/16%,1114/53%,1076/46%	358/0%,178/1%,322/1%	638/47%,962/60%,547/50%	252/0%,228/1%,233/0%	402/40%,686/39%,475/57%	-	-
chr5A_86181649	TraesCS5A02G073800		-	-	4	Three common	302/0%,104/0%,261/0%	908/47%,1566/56%,982/62%	139/0%,174/0%,216/0%	582/51%,1427/62%,1624/54%	161/0%,271/0%,288/0%	836/53%,1277/66%,1477/65%	-	-
chr5A_86181650	TraesCS5A02G073800		-	-	4	Three common	303/0%,104/0%,261/0%	910/47%,1543/56%,971/61%	139/0%,175/0%,215/0%	582/51%,1411/62%,1613/54%	160/0%,273/0%,288/0%	838/53%,1255/66%,1457/65%	-	-
chr5A_86181651	TraesCS5A02G073800		-	-	4	Three common	302/0%,106/0%,259/0%	910/47%,1540/56%,969/61%	139/0%,177/1%,213/0%	584/52%,1409/62%,1612/54%	161/0%,272/0%,288/0%	840/53%,1253/66%,1456/64%	-	-
chr5A_86181655	TraesCS5A02G073800		-	-	4	Three common	289/0%,103/1%,260/0%	923/50%,1538/56%,974/61%	126/0%,167/1%,213/1%	606/53%,1410/62%,1607/54%	149/0%,258/0%,284/0%	864/56%,1253/66%,1463/65%	-	-
chr5A_95568180	TraesCS5A02G078000	TraesCS5A02G078000.1	-	-	4	Three common	284/0%,134/0%,268/0%	283/26%,227/16%,194/8%	124/0%,163/0%,250/0%	137/12%,208/14%,279/10%	207/0%,225/0%,231/0%	233/24%,222/20%,239/21%	-	-
chr6A_91424479	TraesCS6A02G119700	TraesCS6A02G119700.1	rubi3	Polyubiquitin	2	Three common	481/8%,617/0%,688/0%	730/19%,1462/62%,1279/60%	912/0%,447/0%,655/1%	970/62%,1315/73%,736/57%	498/0%,400/0%,449/1%	655/51%,928/48%,706/69%	-	-
chr6A_91424406	TraesCS6A02G119800	TraesCS6A02G119800.1	OsEXO70G1	-	4	Three common	381/0%,148/0%,331/0%	1180/66%,1717/76%,1371/77%	172/0%,200/0%,254/1%	880/76%,1670/81%,1742/75%	247/0%,351/0%,305/0%	998/83%,1583/86%,1723/85%	-	-
chr6A_91424424	TraesCS6A02G119800		OsEXO70G1	-	4	Three common	473/0%,175/1%,364/0%	1559/68%,1818/74%,1437/75%	197/0%,233/0%,276/1%	1160/78%,1730/80%,1850/72%	280/0%,444/0%,332/0%	1329/85%,1649/85%,1796/84%	-	-
chr6A_91424427	TraesCS6A02G119800		OsEXO70G1	-	4	Three common	506/0%,180/1%,371/0%	1584/67%,1838/74%,1447/75%	206/0%,246/0%,281/1%	1168/78%,1748/80%,1874/72%	298/0%,465/0%,341/0%	1343/84%,1669/85%,1814/83%	-	-
chr6B_149055389	TraesCS6B02G148000	TraesCS6B02G148000.1	UBQ11	Polyubiquitin	4	Three common	59/0%,30/0%,54/0%	170/68%,101/37%,78/35%	23/0%,33/0%,172/0%	98/81%,111/51%,110/39%	283/0%,417/0%,441/0%	466/19%,432/9%,559/10%	-	-
chr6B_149055391	TraesCS6B02G148000		UBQ11	Polyubiquitin	4	Three common	59/0%,30/0%,55/0%	170/68%,100/39%,78/35%	23/0%,33/0%,172/0%	98/81%,111/51%,108/40%	283/0%,417/0%,442/0%	468/19%,435/9%,560/10%	-	-
chr7A_77150219	TraesCS7A02G119700	TraesCS7A02G119700.1	-	Histone H3	2	Three common	34/0%,56/0%,74/0%	95/18%,107/61%,130/56%	96/0%,19/0%,47/4%	46/41%,49/71%,55/38%	16/0%,11/0%,25/0%	53/34%,100/21%,48/31%	-	-
chr7A_77150227	TraesCS7A02G119700		-	Histone H3	2	Three common	35/0%,56/0%,104/0%	94/20%,123/54%,153/52%	102/1%,21/0%,70/1%	48/42%,59/66%,65/34%	18/6%,13/0%,39/0%	58/23%,111/19%,64/27%	-	-
chr7A_77150237	TraesCS7A02G119700		-	Histone H3	2	Three common	38/0%,67/0%,128/0%	104/19%,153/61%,206/58%	121/0%,26/0%,87/0%	54/39%,86/63%,84/40%	25/0%,16/0%,46/0%	70/30%,138/25%,79/32%	-	-
#Note: Editing efficiency of each RDD only are for the dpi that present in column F. And each percent number represent the 3 biological replicates, respectively.

## Sheet: Table S3
Table S3. The primer sequences used for Sanger sequence analysis in this study.
Gene	Orthologues	Reverse	Forward	Editing
TraesCS4A02G126700	OsCam1-3	TGAACATCGGCTGGATCACTTG	GAAGAGCCTGAGAAGGTAGCATG	YES
TraesCS3A02G263900	OsRACK1	CCAGCATAGAGAGTGCTGGCATC	CACTTCGTCCAGGACGTCGTC	YES
TraesCS4D02G207500	OsHsp71.1	TGACCATCCGGTTGTCGAAGTC	CATGACCGTGTGGAGATCATCG	NO
TraesCS4D02G140800	OsHSP70	GATGGTGTTGCGCATGTTGTAG	ATGGACAAGAGCACTGTCCATG	NO
TraesCS1B02G294300	AtHSP70-4	ACTACTTCCAGCTACTAGATGAC	CTCCATGGTGCTCATCAAGATG	NO
TraesCS6D02G401900	EIF4A3A	ACACTTCCATGTTCCCAAAGCAAC	CACCAACAACTTCACGGTGTCAG	NO
TraesCS6B02G148000	UBQ11	ACAAGACACATGACTAACAGCAGC	TCTGGATTCTTCTCTGCAGATGCAG	NO
TraesCS4D02G319400	AtGAPB	GACATTGGATCCAATCCAAGCATC	CAAGAAGGTCATCATCACTGCTC	NO
TraesCS3A02G087300	OsNADPH1	CGTGGTTGATAATTGATCTGCTAC	GGACCTACTCATCAACAAGTTCG	NO
TraesCS2D02G179300	AtRPS3C	AGGTCTCAGGAACTCATCCTCATC	TACGCCGAGAAGGTCCTGAAC	NO

## Sheet: Table S4
Table S4. The expression level of these identified 36 RDD genes.
Gene ID	Orthologues	HC374 2dpi			HC374 4dpi			Nyubai 2dpi			Nyubai 4dpi			Wuhan 1 2dpi			Wuhan 1 4dpi			Shaw 2dpi			Shaw 4dpi			HC374		Nyubai		Wuhan 1		Shaw
		log2FoldChange	PValue	FDR	log2FoldChange	PValue	FDR	log2FoldChange	PValue	FDR	log2FoldChange	PValue	FDR	log2FoldChange	PValue	FDR	log2FoldChange	PValue	FDR	log2FoldChange	PValue	FDR	log2FoldChange	PValue	FDR	2 dpi	4 dpi	2 dpi	4 dpi	2 dpi	4 dpi	2 dpi	4 dpi
TraesCS1A02G201300	-	-0.386137	0.149436	0.316453	-1.20607	0.00203322	0.00914948	-0.153325	0.715347	0.836442	-0.146763	0.844882	0.894581	0.636908	0.00174218	0.00570167	0.285585	0.392133	0.705839	0.0790716	0.932688	0.988395	-1.31213	3.32305e-05	7.03704e-05	0	-1	0	0	0	0	0	-1
TraesCS1A02G258800	AtTUBB6	-1.07835	2.88529e-05	0.000173118	-1.83625	1.85739e-22	6.68659e-21	-1.10022	0.000193769	0.00116261	-1.2776	6.20945e-09	2.2354e-07	-0.425722	0.0144073	0.0370473	-0.600433	5.1483e-05	0.000370677	-2.29133	1.62873e-06	2.27206e-05	-2.68186	6.41164e-16	3.29742e-15	-1	-1	-1	-1	0	0	-1	-1
TraesCS1B02G294300	AtHSP70-4	-0.251766	0.193954	0.367491	-0.160825	0.636135	0.693966	-0.120382	0.766738	0.836442	-0.433864	0.26872	0.509154	-0.429702	0.0759117	0.136641	0.107405	0.548224	0.812913	-0.007245	1	1	-1.54475	2.56078e-13	1.02431e-12	0	0	0	0	0	0	0	-1
TraesCS1D02G083600	OsAP1	0.272407	0.173108	0.346217	0.392173	0.177179	0.289929	0.125097	0.667906	0.836442	0.139391	0.735139	0.827031	-0.679996	0.000239811	0.000959244	-0.0756767	0.725854	0.871025	-0.132338	0.775691	0.900802	0.327832	0.104391	0.121229	0	0	0	0	0	0	0	0
TraesCS1D02G258800	AtTUBB6	-1.14316	4.49611e-09	1.6186e-07	-1.57733	4.32449e-14	7.78408e-13	-1.07922	7.10174e-05	0.000639157	-1.26155	2.09357e-08	3.76843e-07	-0.442559	0.0168703	0.0404888	-0.754329	1.04107e-06	9.36961e-06	-1.78347	1.89338e-06	2.27206e-05	-1.27493	2.18824e-06	5.25178e-06	-1	-1	-1	-1	0	0	-1	-1
TraesCS1D02G338400	EIF2 GAMMA	0.0990362	0.835033	0.925563	-0.0427815	1	1	0.201321	0.68398	0.836442	0.0290974	1	1	-0.334706	0.362333	0.449793	0.0199841	1	1	0.091476	0.938382	0.988395	0.775097	0.0571445	0.0734715	0	0	0	0	0	0	0	0
TraesCS1D02G405400	OsRPS27a	0.120092	0.559859	0.719819	-0.304594	0.31054	0.429978	-0.00863182	1	1	-0.0840086	0.804029	0.877123	0.322809	0.101278	0.158523	0.123902	0.633977	0.812913	0.0709182	0.876549	0.986117	-0.589713	0.0388985	0.0587334	0	0	0	0	0	0	0	0
TraesCS2A02G083300	-	0.230648	0.0655767	0.181597	0.342944	0.154272	0.289929	0.573299	0.000118695	0.000854602	0.24238	0.44652	0.669781	-0.207119	0.0194264	0.0437094	0.349228	0.0169828	0.0818074	0.742529	0.0186074	0.0837333	1.40866	1.49948e-38	1.79937e-37	0	0	0	0	0	0	0	1
TraesCS2B02G209100	ELF5A-3	-0.565252	0.0455778	0.136733	-0.293472	0.212915	0.319372	0.0108361	0.967258	0.994894	-0.286973	0.201746	0.450161	0.0152313	0.862474	0.970284	-0.394757	0.0229104	0.0818074	-1.01422	0.000343773	0.00247517	-0.144176	0.346038	0.377496	0	0	0	0	0	0	-1	0
TraesCS2D02G179300	AtRPS3C	0.160423	0.41448	0.621721	-0.132046	0.610349	0.693966	0.178961	0.307034	0.531177	-0.0873775	0.695525	0.807707	0.223723	0.19969	0.270818	-0.0111007	0.936354	1	0.232487	0.495097	0.71277	-0.517533	0.0160431	0.0275025	0	0	0	0	0	0	0	0
TraesCS2D02G405500	rubi3	0.205573	0.274921	0.486087	1.01376	1.96139e-05	0.00014122	0.787115	0.00177799	0.00914397	0.87343	0.00052752	0.00474768	-0.444622	0.0388101	0.0821861	0.573854	0.00233087	0.0139852	0.639039	0.0722041	0.178767	2.34095	8.97308e-33	8.07578e-32	0	1	0	0	0	0	0	1
TraesCS3A02G087300	OsNADPH1	0.0918786	0.848432	0.925563	0.27259	0.712697	0.754621	-0.201075	0.761722	0.836442	0.656357	0.342962	0.587935	1.01139	0.00606304	0.0170112	0.37615	0.541719	0.812913	0.559523	0.465986	0.698978	0.328472	0.583507	0.583507	0	0	0	0	1	0	0	0
TraesCS3A02G263900	OsRACK1	0.014526	0.954635	1	-0.287661	0.207115	0.319372	-0.0978449	0.711683	0.836442	-0.172335	0.607735	0.79589	0.497493	0.000421431	0.00151715	0.409083	0.0549117	0.152063	0.173003	0.624561	0.830663	-0.4123	0.0322537	0.0527788	0	0	0	0	0	0	0	0
TraesCS3D02G049300	-	1.21986	0.0959539	0.235054	1.51723	0.0404743	0.104077	1.3588	0.053062	0.159186	1.28327	0.212576	0.450161	-0.244537	1	1	0.865622	0.298293	0.565187	0.348567	0.646071	0.830663	0.647674	0.430025	0.442311	0	0	0	0	0	0	0	0
TraesCS3D02G328300	CAM2	-0.503607	0.00815356	0.0293528	-0.691642	0.0123717	0.0445382	-0.978027	6.35752e-07	1.14435e-05	-0.434285	0.137064	0.328953	-1.20597	1.63255e-12	2.9386e-11	-0.45018	0.0437097	0.131129	-0.84468	0.0580383	0.178767	-0.658887	0.0503862	0.0678886	0	0	0	0	-1	0	0	0
TraesCS4A02G097900	OsHsp71.1	0.922605	1.40236e-06	1.68284e-05	1.63591	1.39682e-05	0.000125714	1.86211	0.0185498	0.0741991	1.03403	0.000801579	0.00577137	-0.0372427	0.902706	0.981185	2.01623	1.34357e-24	4.83685e-23	1.47077	0.00806404	0.0414722	2.70534	8.94739e-31	6.44212e-30	0	1	0	1	0	1	1	1
TraesCS4A02G107600	-	-0.168019	0.0212122	0.0694218	-0.437555	0.176309	0.289929	-0.103752	0.554998	0.832497	-0.412207	0.079533	0.238524	-0.472941	8.41842e-09	7.57657e-08	-0.400599	0.0249967	0.0818074	-0.642888	0.0744865	0.178767	-0.881396	4.13926e-09	1.24178e-08	0	0	0	0	0	0	0	0
TraesCS4A02G126700	OsCam1-3	0.133829	0.656719	0.815237	0.16959	0.628824	0.693966	0.0379628	0.942746	0.994894	0.37956	0.329305	0.587935	0.305543	0.203114	0.270818	0.432688	0.121153	0.290768	0.330026	0.437088	0.684138	0.644896	0.0397541	0.0587334	0	0	0	0	0	0	0	0
TraesCS4A02G190500	OsRPS16B	0.140099	0.491661	0.699545	0.107294	0.807352	0.83042	0.427953	0.0789751	0.2187	0.163635	0.641134	0.79589	1.02906	7.61231e-07	5.48086e-06	0.169485	0.574524	0.812913	0.649601	0.13599	0.287979	0.547434	0.0814392	0.0977271	0	0	0	0	1	0	0	0
TraesCS4B02G128700	AtRPL8A	-0.00119948	1	1	-0.259104	0.430419	0.516503	0.106789	0.693108	0.836442	0.194068	0.632939	0.79589	0.892024	5.19492e-05	0.000267167	-0.0149469	1	1	0.621622	0.161248	0.321891	-0.500233	0.061271	0.0760606	0	0	0	0	0	0	0	0
TraesCS4B02G178200	TaCaM1-1	0.226897	0.323286	0.506013	0.388562	0.160749	0.289929	0.344776	0.109587	0.263031	0.819741	0.0107572	0.0553229	0.0220056	0.95393	0.981185	0.394316	0.075646	0.194518	0.479943	0.178829	0.321891	0.856742	0.00051942	0.000934955	0	0	0	0	0	0	0	0
TraesCS4B02G248500	OsSEC61	1.37962	0.00127726	0.00510905	0.958892	0.1127	0.253574	2.03683	6.39836e-06	7.67803e-05	-0.548031	0.1243	0.319627	0.668136	0.0926198	0.15156	0.034643	1	1	1.98265	0.000159985	0.00143986	-0.374384	0.357147	0.378156	1	0	1	0	0	0	1	0
TraesCS4D02G140800	OsHSP70	-0.255513	0.0979393	0.235054	-0.672709	0.00452088	0.0180835	-0.25223	0.331662	0.542719	-0.720757	0.00881723	0.0529034	-0.734511	5.00265e-13	1.80095e-11	-0.21716	0.146443	0.310115	-1.04772	0.00423695	0.0254217	-1.11372	9.50073e-10	3.10933e-09	0	0	0	0	0	0	-1	-1
TraesCS4D02G207500	OsHsp71.1	0.854888	4.35303e-06	3.13419e-05	1.27465	0.000129261	0.000664773	1.70974	0.0275621	0.0992237	0.666524	0.0246964	0.111134	-0.159305	0.619847	0.743816	1.56658	9.44915e-16	1.70085e-14	1.08118	0.0597457	0.178767	1.8222	7.43802e-16	3.34711e-15	0	1	0	0	0	1	0	1
TraesCS4D02G319400	AtGAPB	-0.802352	0.00120944	0.00510905	-1.42183	0.000117104	0.000664773	-0.804584	0.0161215	0.0725468	-1.04303	0.0665927	0.21794	0.461453	0.0714861	0.135447	-0.153923	0.634322	0.812913	-1.05021	0.0584595	0.178767	-2.81761	4.33693e-18	2.60216e-17	0	-1	0	0	0	0	0	-1
TraesCS5A02G073800	-	0.538723	3.89438e-06	3.13419e-05	0.810653	3.05352e-06	3.66422e-05	0.929175	3.35248e-13	1.20689e-11	0.871377	1.35178e-05	0.000162213	0.144557	0.131121	0.196682	0.773153	5.30151e-08	6.36182e-07	1.38445	8.68599e-07	2.27206e-05	1.87536	6.17812e-81	2.22412e-79	0	0	0	0	0	0	1	1
TraesCS5A02G078000	-	-0.152015	0.285949	0.486087	-0.680635	0.0182709	0.0597957	-0.410059	0.0331158	0.108379	-0.57799	0.0861337	0.238524	-0.603162	1.55315e-05	9.31892e-05	-0.411094	0.0243771	0.0818074	-0.788679	0.0255744	0.102298	-1.06195	1.68427e-05	3.7896e-05	0	0	0	0	0	0	0	-1
TraesCS6A02G119700	rubi3	-0.21693	0.112213	0.25248	0.177541	0.423978	0.516503	-0.197668	0.285077	0.531177	0.130358	0.607739	0.79589	-0.503168	0.000195329	0.000878979	-0.428152	0.0248787	0.0818074	0.111647	0.763564	0.900802	1.10119	3.74296e-08	9.62474e-08	0	0	0	0	0	0	0	1
TraesCS6A02G119800	OsEXO70G1	-0.530647	0.505227	0.699545	-0.712044	0.331707	0.442276	-0.638373	0.500973	0.784132	-0.8694	0.261882	0.509154	-0.373062	0.678135	0.787512	-0.926482	0.221449	0.442897	-1.35796	0.170111	0.321891	-2.44324	0.0407871	0.0587334	0	0	0	0	0	0	0	0
TraesCS6B02G079200	-	1.07325	1.17196e-07	2.10953e-06	1.44858	0.0312456	0.0937369	0.309715	0.309854	0.531177	1.40181	0.0462154	0.184862	0.435893	0.0830691	0.142404	0.292357	0.567006	0.812913	1.92579	0.0699081	0.178767	4.60553	2.44137e-57	4.39446e-56	1	0	0	0	0	0	0	1
TraesCS6B02G110300	-	0.170767	0.806675	0.925563	0.536123	0.264957	0.381539	0.315149	0.615469	0.836442	0.428228	0.446364	0.669781	-0.509752	0.264647	0.340261	0.311158	0.481327	0.812913	0.71896	0.222164	0.380852	1.31556	0.000227613	0.000431266	0	0	0	0	0	0	0	1
TraesCS6B02G148000	UBQ11	0.0051776	1	1	1.10009	0.0341025	0.0944378	0.49824	0.109596	0.263031	0.754715	0.0572265	0.206016	-0.279561	0.0535963	0.107193	-0.0868684	0.654846	0.812913	0.460017	0.135062	0.287979	1.26482	7.28012e-10	2.62084e-09	0	0	0	0	0	0	0	1
TraesCS6B02G164600	rubq2	-0.305019	0.000432592	0.00222476	0.288269	0.168349	0.289929	-0.190663	0.191325	0.38265	0.0947053	0.685311	0.807707	-0.62917	4.35645e-09	5.22774e-08	-0.0848325	0.625465	0.812913	-0.181355	0.514778	0.71277	0.90461	6.81244e-09	1.88652e-08	0	0	0	0	0	0	0	0
TraesCS6D02G401900	EIF4A3A	-0.134943	0.547441	0.719819	-0.296452	0.354104	0.455277	-0.133893	0.735261	0.836442	-0.372772	0.382951	0.626647	-0.341587	0.165422	0.238208	-0.384171	0.130917	0.294563	-0.482888	0.300064	0.491014	0.308481	0.294363	0.331159	0	0	0	0	0	0	0	0
TraesCS7A02G119700	-	-0.292233	0.297053	0.486087	-0.892171	0.0642372	0.154169	-0.620379	0.121162	0.272615	-0.344911	0.569576	0.79589	0.870265	0.00614294	0.0170112	0.00432875	1	1	-0.29099	0.768734	0.900802	-2.85603	3.67543e-05	7.35085e-05	0	0	0	0	0	0	0	-1
TraesCS5B02G349100	-	-0.0449296	0.785326	0.925563	-0.518504	0.164082	0.289929	-0.399783	0.148416	0.314292	0.0583772	0.924415	0.950827	0.0238941	0.952971	0.981185	0.0739308	0.830143	0.964036	-0.0544139	0.960939	0.988395	-0.47425	0.05	0.0678886	0	0	0	0	0	0	0	0

## Sheet: Table S5
Table S5. Correlation between RDD genes and FHB-trait.
RDD genes	Orthologues	Fg-Percentage		DON		Fg-GAPDH		Treatment		Time
		Cor	P-value	Cor	P-value	Cor	P-value	Cor	P-value	Cor	P-value
TraesCS1A02G201300	-	-0.554	0.026	-0.549	0.028	-0.499	0.049	-0.326	0.218	-0.434	0.093
TraesCS1A02G258800	AtTUBB6	-0.604	0.013	-0.616	0.011	-0.511	0.043	-0.641	0.007	-0.682	0.004
TraesCS1B02G294300	AtHSP70-4	-0.395	0.13	-0.37	0.158	-0.409	0.116	-0.225	0.401	-0.118	0.664
TraesCS1D02G083600	OsAP1	0.081	0.766	0.079	0.771	-0.01	0.971	0.087	0.748	0.297	0.264
TraesCS1D02G258800	AtTUBB6	-0.599	0.014	-0.608	0.012	-0.503	0.047	-0.68	0.004	-0.706	0.002
TraesCS1D02G338400	EIF2 GAMMA	-0.195	0.469	-0.176	0.514	-0.28	0.294	0.201	0.456	0.279	0.295
TraesCS1D02G405400	OsRPS27a	-0.605	0.013	-0.587	0.017	-0.586	0.017	-0.045	0.87	-0.2	0.457
TraesCS2A02G083300	-	0.628	0.009	0.635	0.008	0.497	0.05	0.804	0	0.878	0
TraesCS2B02G209100	ELF5A-3	-0.459	0.074	-0.455	0.077	-0.342	0.195	-0.514	0.042	-0.599	0.014
TraesCS2D02G179300	AtRPS3C	-0.551	0.027	-0.517	0.04	-0.6	0.014	0.014	0.959	0.003	0.991
TraesCS2D02G405500	rubi3	0.919	0	0.926	0	0.857	0	0.651	0.006	0.796	0
TraesCS3A02G087300	OsNADPH1	-0.283	0.288	-0.305	0.251	-0.307	0.248	0.264	0.323	0.016	0.953
TraesCS3A02G263900	OsRACK1	-0.438	0.089	-0.437	0.091	-0.443	0.086	-0.038	0.889	-0.167	0.536
TraesCS3D02G049300	-	0.118	0.663	0.091	0.739	-0.043	0.876	0.699	0.003	0.587	0.017
TraesCS3D02G328300	CAM2	-0.567	0.022	-0.577	0.019	-0.503	0.047	-0.601	0.014	-0.62	0.01
TraesCS4A02G097900	OsHsp71.1	0.854	0	0.845	0	0.768	0.001	0.695	0.003	0.857	0
TraesCS4A02G107600	-	-0.745	0.001	-0.708	0.002	-0.71	0.002	-0.546	0.029	-0.483	0.058
TraesCS4A02G126700	OsCam1-3	-0.046	0.867	-0.098	0.719	-0.115	0.672	0.412	0.113	0.244	0.362
TraesCS4A02G190500	OsRPS16B	-0.093	0.731	-0.075	0.783	-0.154	0.568	0.565	0.023	0.353	0.181
TraesCS4B02G128700	AtRPL8A	-0.479	0.061	-0.464	0.07	-0.498	0.05	0.134	0.62	-0.058	0.831
TraesCS4B02G178200	TaCaM1-1	-0.017	0.95	-0.058	0.83	-0.123	0.649	0.524	0.037	0.378	0.149
TraesCS4B02G248500	OsSEC61	0.211	0.433	0.226	0.401	0.164	0.545	0.191	0.479	0.259	0.332
TraesCS4D02G140800	OsHSP70	-0.67	0.004	-0.675	0.004	-0.626	0.01	-0.611	0.012	-0.56	0.024
TraesCS4D02G207500	OsHsp71.1	0.67	0.005	0.662	0.005	0.552	0.027	0.734	0.001	0.867	0
TraesCS4D02G319400	AtGAPB	-0.631	0.009	-0.632	0.009	-0.536	0.032	-0.614	0.011	-0.677	0.004
TraesCS5A02G073800	-	0.506	0.046	0.513	0.042	0.38	0.146	0.824	0	0.863	0
TraesCS5A02G078000	-	-0.739	0.001	-0.748	0.001	-0.698	0.003	-0.575	0.02	-0.61	0.012
TraesCS6A02G119700	rubi3	0.192	0.476	0.226	0.399	0.194	0.472	-0.035	0.897	0.126	0.642
TraesCS6A02G119800	OsEXO70G1	-0.787	0	-0.761	0.001	-0.695	0.003	-0.797	0	-0.744	0.001
TraesCS6B02G079200	-	0.726	0.001	0.722	0.002	0.732	0.001	0.534	0.033	0.467	0.068
TraesCS6B02G110300	-	0.771	0	0.791	0	0.693	0.003	0.562	0.023	0.75	0.001
TraesCS6B02G148000	UBQ11	0.603	0.013	0.592	0.016	0.531	0.034	0.353	0.179	0.535	0.033
TraesCS6B02G164600	rubq2	0.065	0.812	0.107	0.694	0.062	0.821	-0.079	0.771	0.097	0.721
TraesCS6D02G401900	EIF4A3A	-0.273	0.307	-0.271	0.31	-0.265	0.321	-0.272	0.309	-0.212	0.431
TraesCS7A02G119700	-	-0.632	0.009	-0.624	0.01	-0.586	0.017	-0.261	0.329	-0.402	0.122
TraesCS5B02G349100	-	-0.524	0.037	-0.509	0.044	-0.483	0.058	-0.232	0.387	-0.327	0.216

## Sheet: Table S6
Table S6. Function enrichment of the RDD genes.
Term	Database	ID	Input gene	Input number	Background number	P-Value	Corrected P-Value
Spliceosome	KEGG PATHWAY	ath03040	TraesCS6D02G401900.1|TraesCS1B02G294300.1|TraesCS4D02G140800.1|TraesCS4D02G207500.1|TraesCS5A02G078000.1|TraesCS4A02G097900.1	6	192	6.34529e-08	4.64208e-07
Protein processing in endoplasmic reticulum	KEGG PATHWAY	ath04141	TraesCS1B02G294300.1|TraesCS4D02G140800.1|TraesCS4D02G207500.1|TraesCS5A02G078000.1|TraesCS4B02G248500.1|TraesCS4A02G097900.1	6	211	1.09112e-07	7.22218e-07
Endocytosis	KEGG PATHWAY	ath04144	TraesCS5A02G078000.1|TraesCS1B02G294300.1|TraesCS4D02G207500.1|TraesCS4D02G140800.1|TraesCS4A02G097900.1	5	144	5.29639e-07	2.72666e-06
RNA transport	KEGG PATHWAY	ath03013	TraesCS2A02G083300.1|TraesCS1D02G338400.1|TraesCS4A02G107600.1|TraesCS6D02G401900.1	4	171	3.6225e-05	0.000120218
Ribosome	KEGG PATHWAY	ath03010	TraesCS5A02G073800.1|TraesCS2D02G179300.1|TraesCS4A02G190500.1|TraesCS4B02G128700.1|TraesCS1D02G405400.1	5	364	4.34283e-05	0.000140385
Phosphatidylinositol signaling system	KEGG PATHWAY	ath04070	TraesCS4B02G178200.1|TraesCS3D02G328300.1|TraesCS4A02G126700.1	3	76	8.36054e-05	0.000247259
Phagosome	KEGG PATHWAY	ath04145	TraesCS1A02G258800.1|TraesCS4B02G248500.1|TraesCS1D02G258800.1	3	82	0.000103966	0.000283359
MAPK signaling pathway - plant	KEGG PATHWAY	ath04016	TraesCS4B02G178200.1|TraesCS3D02G328300.1|TraesCS4A02G126700.1	3	134	0.000424813	0.000990749
Plant-pathogen interaction	KEGG PATHWAY	ath04626	TraesCS4B02G178200.1|TraesCS3D02G328300.1|TraesCS4A02G126700.1	3	170	0.000837062	0.0017629
cytosol	Gene Ontology	GO:0005829	TraesCS6A02G119800.1|TraesCS6B02G164600.1|TraesCS1D02G405400.1|TraesCS6B02G079200.1|TraesCS4D02G140800.1|TraesCS5A02G073800.1|TraesCS6B02G148000.1|TraesCS1A02G201300.1|TraesCS2D02G405500.1|TraesCS2D02G179300.1|TraesCS4D02G319400.1|TraesCS4A02G097900.1|TraesCS4B02G178200.1|TraesCS1D02G083600.1|TraesCS3A02G263900.1|TraesCS3D02G328300.1|TraesCS4D02G207500.1|TraesCS5A02G078000.1|TraesCS6B02G110300.1|…	28	3025	4.36452e-23	6.06669e-21
mRNA binding	Gene Ontology	GO:0003729	TraesCS6B02G164600.1|TraesCS6B02G110300.1|TraesCS6D02G401900.1|TraesCS4A02G190500.1|TraesCS1D02G405400.1|TraesCS6A02G119700.1|TraesCS2D02G405500.1|TraesCS1D02G258800.1|TraesCS3A02G263900.1|TraesCS4D02G140800.1|TraesCS5A02G078000.1|TraesCS6B02G148000.1|TraesCS2D02G179300.1|TraesCS4B02G128700.1|TraesCS4D02G207500.1|TraesCS1A02G258800.1|TraesCS4D02G319400.1|TraesCS4B02G248500.1|TraesCS5A02G073800.1	19	855	2.81582e-21	1.957e-19
ubiquitin protein ligase binding	Gene Ontology	GO:0031625	TraesCS6B02G164600.1|TraesCS6B02G110300.1|TraesCS1D02G405400.1|TraesCS2D02G405500.1|TraesCS1B02G294300.1|TraesCS6A02G119700.1|TraesCS5A02G073800.1|TraesCS6B02G148000.1|TraesCS4A02G097900.1	9	50	7.16944e-18	3.32184e-16
modification-dependent protein catabolic process	Gene Ontology	GO:0019941	TraesCS6B02G164600.1|TraesCS6B02G110300.1|TraesCS1D02G405400.1|TraesCS2D02G405500.1|TraesCS6B02G148000.1|TraesCS5A02G073800.1|TraesCS6A02G119700.1	7	20	7.33733e-16	2.54972e-14
protein tag	Gene Ontology	GO:0031386	TraesCS6B02G164600.1|TraesCS6B02G110300.1|TraesCS1D02G405400.1|TraesCS2D02G405500.1|TraesCS6B02G148000.1|TraesCS5A02G073800.1|TraesCS6A02G119700.1	7	26	3.51395e-15	9.76879e-14
cytoplasm	Gene Ontology	GO:0005737	TraesCS6A02G119800.1|TraesCS6B02G164600.1|TraesCS1D02G405400.1|TraesCS4D02G140800.1|TraesCS1A02G258800.1|TraesCS6B02G148000.1|TraesCS2D02G405500.1|TraesCS1D02G258800.1|TraesCS5A02G073800.1|TraesCS4A02G097900.1|TraesCS4B02G178200.1|TraesCS3A02G263900.1|TraesCS3D02G328300.1|TraesCS4D02G207500.1|TraesCS5A02G078000.1|TraesCS6B02G110300.1|TraesCS4A02G190500.1|TraesCS1B02G294300.1|TraesCS2B02G209100.1|…	24	4014	1.50813e-14	3.49383e-13
cellular response to unfolded protein	Gene Ontology	GO:0034620	TraesCS5A02G078000.1|TraesCS1B02G294300.1|TraesCS4D02G207500.1|TraesCS4D02G140800.1|TraesCS4A02G097900.1	5	17	2.68737e-11	5.33636e-10
response to unfolded protein	Gene Ontology	GO:0006986	TraesCS5A02G078000.1|TraesCS1B02G294300.1|TraesCS4D02G207500.1|TraesCS4D02G140800.1|TraesCS4A02G097900.1	5	18	3.43124e-11	5.96179e-10
misfolded protein binding	Gene Ontology	GO:0051787	TraesCS5A02G078000.1|TraesCS1B02G294300.1|TraesCS4D02G207500.1|TraesCS4D02G140800.1|TraesCS4A02G097900.1	5	20	5.40948e-11	8.35465e-10
protein folding chaperone	Gene Ontology	GO:0044183	TraesCS5A02G078000.1|TraesCS1B02G294300.1|TraesCS4D02G207500.1|TraesCS4D02G140800.1|TraesCS4A02G097900.1	5	22	8.20706e-11	1.14078e-09
heat shock protein binding	Gene Ontology	GO:0031072	TraesCS5A02G078000.1|TraesCS1B02G294300.1|TraesCS4D02G207500.1|TraesCS4D02G140800.1|TraesCS4A02G097900.1	5	24	1.20543e-10	1.52322e-09
protein refolding	Gene Ontology	GO:0042026	TraesCS5A02G078000.1|TraesCS1B02G294300.1|TraesCS4D02G207500.1|TraesCS4D02G140800.1|TraesCS4A02G097900.1	5	31	3.80627e-10	4.40893e-09
Golgi apparatus	Gene Ontology	GO:0005794	TraesCS1D02G405400.1|TraesCS4A02G190500.1|TraesCS1B02G294300.1|TraesCS6B02G079200.1|TraesCS4D02G140800.1|TraesCS5B02G349100.1|TraesCS2D02G179300.1|TraesCS4D02G207500.1|TraesCS5A02G078000.1|TraesCS4B02G248500.1|TraesCS1A02G201300.1|TraesCS4A02G097900.1	12	1088	7.92877e-10	8.47768e-09
response to cadmium ion	Gene Ontology	GO:0046686	TraesCS1B02G294300.1|TraesCS3A02G263900.1|TraesCS4D02G140800.1|TraesCS4D02G207500.1|TraesCS5A02G078000.1|TraesCS4D02G319400.1|TraesCS3A02G087300.1|TraesCS4A02G097900.1	8	296	9.51128e-10	8.92246e-09
cytosolic ribosome	Gene Ontology	GO:0022626	TraesCS4B02G128700.1|TraesCS3A02G263900.1|TraesCS4D02G140800.1|TraesCS4A02G190500.1|TraesCS2D02G179300.1|TraesCS4D02G207500.1|TraesCS5A02G078000.1	7	178	9.62856e-10	8.92246e-09
response to virus	Gene Ontology	GO:0009615	TraesCS5A02G078000.1|TraesCS1B02G294300.1|TraesCS4D02G207500.1|TraesCS4D02G140800.1|TraesCS4A02G097900.1	5	41	1.37344e-09	1.19318e-08
protein ubiquitination	Gene Ontology	GO:0016567	TraesCS6B02G164600.1|TraesCS6B02G110300.1|TraesCS1D02G405400.1|TraesCS2D02G405500.1|TraesCS1B02G294300.1|TraesCS6A02G119700.1|TraesCS5A02G073800.1|TraesCS6B02G148000.1|TraesCS4A02G097900.1	9	479	1.68336e-09	1.32285e-08
chaperone cofactor-dependent protein refolding	Gene Ontology	GO:0051085	TraesCS5A02G078000.1|TraesCS1B02G294300.1|TraesCS4D02G207500.1|TraesCS4D02G140800.1|TraesCS4A02G097900.1	5	43	1.71304e-09	1.32285e-08
unfolded protein binding	Gene Ontology	GO:0051082	TraesCS5A02G078000.1|TraesCS1B02G294300.1|TraesCS4D02G207500.1|TraesCS4D02G140800.1|TraesCS4A02G097900.1	5	95	7.23866e-08	5.03087e-07
protease binding	Gene Ontology	GO:0002020	TraesCS5A02G078000.1|TraesCS4D02G140800.1|TraesCS4D02G207500.1	3	7	1.33444e-07	8.06468e-07
detection of calcium ion	Gene Ontology	GO:0005513	TraesCS4B02G178200.1|TraesCS3D02G328300.1|TraesCS4A02G126700.1	3	7	1.33444e-07	8.06468e-07
protein folding	Gene Ontology	GO:0006457	TraesCS5A02G078000.1|TraesCS1B02G294300.1|TraesCS4D02G207500.1|TraesCS4D02G140800.1|TraesCS4A02G097900.1	5	118	2.04127e-07	1.18224e-06
intracellular anatomical structure	Gene Ontology	GO:0005622	TraesCS6A02G119700.1|TraesCS2D02G405500.1|TraesCS6B02G164600.1|TraesCS6B02G110300.1|TraesCS6B02G148000.1	5	124	2.5883e-07	1.4391e-06
defense response to other organism	Gene Ontology	GO:0098542	TraesCS5A02G078000.1|TraesCS4D02G140800.1|TraesCS4D02G207500.1	3	10	3.17344e-07	1.69657e-06
response to heat	Gene Ontology	GO:0009408	TraesCS5A02G078000.1|TraesCS1B02G294300.1|TraesCS4D02G207500.1|TraesCS4D02G140800.1|TraesCS4A02G097900.1	5	152	6.86131e-07	3.40615e-06
stomatal closure	Gene Ontology	GO:0090332	TraesCS5A02G078000.1|TraesCS4D02G140800.1|TraesCS4D02G207500.1	3	15	9.02117e-07	4.32394e-06
response to cold	Gene Ontology	GO:0009409	TraesCS1D02G258800.1|TraesCS4D02G140800.1|TraesCS5A02G078000.1|TraesCS4D02G207500.1|TraesCS1A02G258800.1|TraesCS4D02G319400.1	6	310	9.86371e-07	4.57019e-06
cell wall	Gene Ontology	GO:0005618	TraesCS1B02G294300.1|TraesCS4D02G140800.1|TraesCS4A02G190500.1|TraesCS4D02G207500.1|TraesCS5A02G078000.1|TraesCS4A02G097900.1	6	337	1.58632e-06	7.11284e-06
plastid	Gene Ontology	GO:0009536	TraesCS1D02G258800.1|TraesCS3D02G328300.1|TraesCS5B02G349100.1|TraesCS2D02G179300.1|TraesCS6B02G079200.1|TraesCS1A02G258800.1|TraesCS3A02G087300.1|TraesCS1A02G201300.1	8	823	2.12919e-06	9.24867e-06
defense response to fungus	Gene Ontology	GO:0050832	TraesCS5A02G078000.1|TraesCS4B02G178200.1|TraesCS4A02G126700.1|TraesCS4D02G140800.1|TraesCS4D02G207500.1	5	194	2.20381e-06	9.28273e-06
negative regulation of seed germination	Gene Ontology	GO:0010187	TraesCS5A02G078000.1|TraesCS4D02G140800.1|TraesCS4D02G207500.1	3	23	2.85759e-06	1.16825e-05
ribosome binding	Gene Ontology	GO:0043022	TraesCS4B02G248500.1|TraesCS2B02G209100.1|TraesCS3A02G263900.1	3	29	5.42749e-06	2.15549e-05
cytosolic small ribosomal subunit	Gene Ontology	GO:0022627	TraesCS4A02G190500.1|TraesCS2D02G179300.1|TraesCS3A02G263900.1|TraesCS1D02G405400.1	4	105	5.61152e-06	2.16667e-05
ATPase activity	Gene Ontology	GO:0016887	TraesCS5A02G078000.1|TraesCS1B02G294300.1|TraesCS4D02G207500.1|TraesCS4D02G140800.1|TraesCS4A02G097900.1	5	248	7.10082e-06	2.66761e-05
heat acclimation	Gene Ontology	GO:0010286	TraesCS5A02G078000.1|TraesCS4D02G140800.1|TraesCS4D02G207500.1	3	43	1.64413e-05	6.01405e-05
ubiquitin-dependent protein catabolic process	Gene Ontology	GO:0006511	TraesCS6A02G119700.1|TraesCS2D02G405500.1|TraesCS6B02G164600.1|TraesCS6B02G110300.1|TraesCS6B02G148000.1	5	299	1.72208e-05	6.13767e-05
plasmodesma	Gene Ontology	GO:0009506	TraesCS1D02G405400.1|TraesCS1D02G083600.1|TraesCS4D02G140800.1|TraesCS4A02G190500.1|TraesCS2D02G179300.1|TraesCS4D02G207500.1|TraesCS5A02G078000.1	7	851	2.9281e-05	0.000101752
plasma membrane	Gene Ontology	GO:0005886	TraesCS4B02G178200.1|TraesCS1D02G405400.1|TraesCS4B02G128700.1|TraesCS1B02G294300.1|TraesCS1D02G258800.1|TraesCS3A02G263900.1|TraesCS4D02G140800.1|TraesCS5A02G078000.1|TraesCS4D02G207500.1|TraesCS1A02G258800.1|TraesCS4A02G126700.1|TraesCS4A02G097900.1	12	2973	3.63249e-05	0.000120218
nucleolus	Gene Ontology	GO:0005730	TraesCS5A02G078000.1|TraesCS2D02G179300.1|TraesCS6D02G401900.1|TraesCS4D02G140800.1|TraesCS4D02G207500.1	5	391	6.0668e-05	0.000191656
microtubule cytoskeleton	Gene Ontology	GO:0015630	TraesCS1A02G258800.1|TraesCS1D02G258800.1	2	10	7.27251e-05	0.00022464
protein binding	Gene Ontology	GO:0005515	TraesCS4B02G178200.1|TraesCS6D02G401900.1|TraesCS6B02G079200.1|TraesCS3A02G263900.1|TraesCS3D02G328300.1|TraesCS5B02G349100.1|TraesCS4D02G140800.1|TraesCS4D02G207500.1|TraesCS5A02G078000.1|TraesCS4B02G248500.1|TraesCS1A02G201300.1|TraesCS4A02G126700.1	12	3199	7.45727e-05	0.000225339
calcium-mediated signaling	Gene Ontology	GO:0019722	TraesCS4B02G178200.1|TraesCS3D02G328300.1|TraesCS4A02G126700.1	3	77	8.67992e-05	0.000251356
vacuolar membrane	Gene Ontology	GO:0005774	TraesCS5A02G078000.1|TraesCS1B02G294300.1|TraesCS4D02G207500.1|TraesCS4D02G140800.1|TraesCS4A02G097900.1	5	434	9.85388e-05	0.000278383
regulation of photomorphogenesis	Gene Ontology	GO:0010099	TraesCS4B02G178200.1|TraesCS4A02G126700.1	2	12	0.000100138	0.000278383
nucleus	Gene Ontology	GO:0005634	TraesCS4B02G178200.1|TraesCS6B02G164600.1|TraesCS6B02G110300.1|TraesCS6D02G401900.1|TraesCS1D02G405400.1|TraesCS6A02G119700.1|TraesCS2D02G405500.1|TraesCS4D02G207500.1|TraesCS3A02G263900.1|TraesCS4D02G140800.1|TraesCS1A02G201300.1|TraesCS5B02G349100.1|TraesCS6B02G148000.1|TraesCS2D02G179300.1|TraesCS3D02G328300.1|TraesCS6B02G079200.1|TraesCS5A02G078000.1|TraesCS4D02G319400.1|TraesCS3A02G087300.1|…	21	9362	0.000107492	0.000287335
translation	Gene Ontology	GO:0006412	TraesCS5A02G073800.1|TraesCS2D02G179300.1|TraesCS4A02G190500.1|TraesCS1D02G405400.1	4	258	0.000172378	0.000452085
structural constituent of ribosome	Gene Ontology	GO:0003735	TraesCS5A02G073800.1|TraesCS2D02G179300.1|TraesCS4B02G128700.1|TraesCS4A02G190500.1	4	263	0.000185296	0.000476966
apoplast	Gene Ontology	GO:0048046	TraesCS5A02G078000.1|TraesCS4D02G319400.1|TraesCS4D02G140800.1|TraesCS4D02G207500.1	4	275	0.00021914	0.000553826
response to temperature stimulus	Gene Ontology	GO:0009266	TraesCS1B02G294300.1|TraesCS4A02G097900.1	2	22	0.000301683	0.000748821
protein heterodimerization activity	Gene Ontology	GO:0046982	TraesCS5B02G349100.1|TraesCS1A02G201300.1|TraesCS6B02G079200.1	3	121	0.000317261	0.000773672
GTP binding	Gene Ontology	GO:0005525	TraesCS1A02G258800.1|TraesCS1D02G338400.1|TraesCS1D02G258800.1	3	123	0.000332505	0.000796864
vacuole	Gene Ontology	GO:0005773	TraesCS5B02G349100.1|TraesCS1D02G083600.1|TraesCS1A02G201300.1|TraesCS4B02G128700.1|TraesCS6B02G079200.1	5	598	0.000427662	0.000990749
structural constituent of cytoskeleton	Gene Ontology	GO:0005200	TraesCS1A02G258800.1|TraesCS1D02G258800.1	2	30	0.000539253	0.00120897
microtubule-based process	Gene Ontology	GO:0007017	TraesCS1A02G258800.1|TraesCS1D02G258800.1	2	30	0.000539253	0.00120897
secretory vesicle	Gene Ontology	GO:0099503	TraesCS1B02G294300.1|TraesCS1D02G083600.1|TraesCS4A02G097900.1	3	148	0.00056418	0.00124478
host cell nucleus	Gene Ontology	GO:0042025	TraesCS5B02G349100.1|TraesCS1A02G201300.1|TraesCS6B02G079200.1	3	151	0.000597403	0.00129748
ATP binding	Gene Ontology	GO:0005524	TraesCS5A02G078000.1|TraesCS1B02G294300.1|TraesCS4D02G207500.1|TraesCS4D02G140800.1|TraesCS4A02G097900.1	5	653	0.000635295	0.00135855
GTPase activity	Gene Ontology	GO:0003924	TraesCS1A02G258800.1|TraesCS1D02G338400.1|TraesCS1D02G258800.1	3	179	0.000969074	0.00199206
mitotic cell cycle	Gene Ontology	GO:0000278	TraesCS1A02G258800.1|TraesCS1D02G258800.1	2	41	0.000974531	0.00199206
microtubule cytoskeleton organization	Gene Ontology	GO:0000226	TraesCS1A02G258800.1|TraesCS1D02G258800.1	2	42	0.00102025	0.00205529
calcium ion binding	Gene Ontology	GO:0005509	TraesCS4B02G178200.1|TraesCS3D02G328300.1|TraesCS4A02G126700.1	3	234	0.00206369	0.0040979
microtubule	Gene Ontology	GO:0005874	TraesCS1A02G258800.1|TraesCS1D02G258800.1	2	65	0.00234809	0.00459697
defense response to bacterium	Gene Ontology	GO:0042742	TraesCS5A02G078000.1|TraesCS4D02G140800.1|TraesCS4D02G207500.1	3	324	0.00509473	0.00983566
signal sequence binding	Gene Ontology	GO:0005048	TraesCS4B02G248500.1	1	5	0.00639501	0.0117159
rescue of stalled ribosome	Gene Ontology	GO:0072344	TraesCS3A02G263900.1	1	5	0.00639501	0.0117159
exon-exon junction complex	Gene Ontology	GO:0035145	TraesCS6D02G401900.1	1	5	0.00639501	0.0117159
response to bacterium	Gene Ontology	GO:0009617	TraesCS1B02G294300.1|TraesCS4A02G097900.1	2	110	0.00640584	0.0117159
posttranslational protein targeting to membrane, translocation	Gene Ontology	GO:0031204	TraesCS4B02G248500.1	1	6	0.00745697	0.0134613
glyceraldehyde-3-phosphate dehydrogenase (NAD+) (phosphorylating) activity	Gene Ontology	GO:0004365	TraesCS4D02G319400.1	1	7	0.00851784	0.0147997
eukaryotic translation initiation factor 2 complex	Gene Ontology	GO:0005850	TraesCS1D02G338400.1	1	7	0.00851784	0.0147997
positive regulation of translational fidelity	Gene Ontology	GO:0045903	TraesCS1D02G338400.1	1	7	0.00851784	0.0147997
RNA binding	Gene Ontology	GO:0003723	TraesCS4A02G190500.1|TraesCS6D02G401900.1|TraesCS4B02G128700.1	3	423	0.0105059	0.0180287
SRP-dependent cotranslational protein targeting to membrane, translocation	Gene Ontology	GO:0006616	TraesCS4B02G248500.1	1	9	0.0106363	0.0180298
response to mechanical stimulus	Gene Ontology	GO:0009612	TraesCS3D02G328300.1	1	10	0.0116938	0.0193505
formation of translation preinitiation complex	Gene Ontology	GO:0001731	TraesCS1D02G338400.1	1	10	0.0116938	0.0193505
2-alkenal reductase [NAD(P)+] activity	Gene Ontology	GO:0032440	TraesCS3A02G087300.1	1	12	0.0138056	0.0225763
reductive pentose-phosphate cycle	Gene Ontology	GO:0019253	TraesCS4D02G319400.1	1	13	0.0148599	0.0237417
enzyme binding	Gene Ontology	GO:0019899	TraesCS3A02G263900.1	1	13	0.0148599	0.0237417
regulation of translation	Gene Ontology	GO:0006417	TraesCS3A02G263900.1	1	14	0.0159131	0.0251355
starch metabolic process	Gene Ontology	GO:0005982	TraesCS3D02G328300.1	1	16	0.0180162	0.0275192
glucose metabolic process	Gene Ontology	GO:0006006	TraesCS4D02G319400.1	1	16	0.0180162	0.0275192
translation elongation factor activity	Gene Ontology	GO:0003746	TraesCS2B02G209100.1	1	16	0.0180162	0.0275192
cellular response to hypoxia	Gene Ontology	GO:0071456	TraesCS1B02G294300.1|TraesCS4A02G097900.1	2	204	0.0204406	0.0308831
ribosome biogenesis	Gene Ontology	GO:0042254	TraesCS3A02G263900.1	1	22	0.0242992	0.0363182
small ribosomal subunit	Gene Ontology	GO:0015935	TraesCS4A02G190500.1	1	23	0.0253426	0.0374747
protein transmembrane transporter activity	Gene Ontology	GO:0008320	TraesCS4B02G248500.1	1	25	0.0274261	0.0401287
tRNA binding	Gene Ontology	GO:0000049	TraesCS1D02G338400.1	1	26	0.0284662	0.0407918
maturation of SSU-rRNA from tricistronic rRNA transcript (SSU-rRNA, 5.8S rRNA, LSU-rRNA)	Gene Ontology	GO:0000462	TraesCS4A02G190500.1	1	26	0.0284662	0.0407918
cellular response to abscisic acid stimulus	Gene Ontology	GO:0071215	TraesCS3A02G263900.1	1	28	0.0305432	0.0433215
stromule	Gene Ontology	GO:0010319	TraesCS4D02G319400.1	1	32	0.0346843	0.0486981
exocyst	Gene Ontology	GO:0000145	TraesCS6A02G119800.1	1	34	0.0367484	0.0510802
endoplasmic reticulum	Gene Ontology	GO:0005783	TraesCS1B02G294300.1|TraesCS4B02G248500.1|TraesCS4A02G097900.1	3	722	0.041863	0.0559874
response to hypoxia	Gene Ontology	GO:0001666	TraesCS6D02G401900.1	1	39	0.0418898	0.0559874
mRNA processing	Gene Ontology	GO:0006397	TraesCS6D02G401900.1	1	39	0.0418898	0.0559874
cytoplasmic translation	Gene Ontology	GO:0002181	TraesCS4B02G128700.1	1	39	0.0418898	0.0559874
endopeptidase activity	Gene Ontology	GO:0004175	TraesCS1D02G083600.1	1	43	0.0459838	0.0608738
exocytosis	Gene Ontology	GO:0006887	TraesCS6A02G119800.1	1	44	0.0470047	0.0616382
response to glucose	Gene Ontology	GO:0009749	TraesCS3A02G263900.1	1	46	0.0490432	0.0637103

## Sheet: Table S7
Table S7. Minimum free energy (MFE) of RNA secondary structure of candidate RDD genes.
Edit site	Type	Strand	Region	Gene	Transcript	Amino acid changes	Original MFE (kcal/mol)	Before editing			After editing			Difference after editing	HC374		Nyubai		Wuhan 1		Shaw
								Ave MFE (Random 100 times) (kcal/mol)	Standard deviation	z-score	Ave MFE (Random 100 times) (kcal/mol)	Standard deviation	z-score		2dpi	4dpi	2dpi	4dpi	2dpi	4dpi	2dpi	4dpi
chr1A_362209999	G > A	-	synonymous_variant	TraesCS1A02G201300	TraesCS1A02G201300.1	Val > Val	-144.6	-141.77	5.57	-0.508079	-140.53	5.47	-0.744059	-0.23598	down	down	down	down	up	up	up	down
chr1A_362210008	G > A	-	synonymous_variant	TraesCS1A02G201300	TraesCS1A02G201300.1	Arg > Arg	-144.6	-141.08	5.26	-0.669202	-141.63	5.53	-0.537071	0.132131	down	down	down	down	up	up	up	down
chr1A_362210017	G > A	-	synonymous_variant	TraesCS1A02G201300	TraesCS1A02G201300.1	Asn > Asn	-144.6	-142.21	6.15	-0.388618	-141.86	5.37	-0.510242	-0.121624	down	down	down	down	up	up	up	down
chr1A_362210018	T > C	-	nonsynonymous_variant	TraesCS1A02G201300	TraesCS1A02G201300.1	Asn > Ser	-144.6	-141.94	5.75	-0.462609	-142.73	5.38	-0.347584	0.115025	down	down	down	down	up	up	up	down
chr1A_362210019	T > C	-	nonsynonymous_variant	TraesCS1A02G201300	TraesCS1A02G201300.1	Asn > Asp	-144.6	-141.92	5.66	-0.473498	-144.49	6.99	-0.0157368	0.457761	down	down	down	down	up	up	up	down
chr1A_362210030	A > G	-	nonsynonymous_variant	TraesCS1A02G201300	TraesCS1A02G201300.1	Ile > Thr	-144.6	-141.43	4.98	-0.636546	-143.84	5.54	-0.137184	0.499362	down	down	down	down	up	up	up	down
chr1A_362210035	G > C	-	synonymous_variant	TraesCS1A02G201300	TraesCS1A02G201300.1	Leu > Leu	-144.6	-142.13	6.38	-0.387147	-142.55	5.94	-0.345118	0.0420295	down	down	down	down	up	up	up	down
chr1A_362210038	C > G	-	synonymous_variant	TraesCS1A02G201300	TraesCS1A02G201300.1	Val > Val	-144.6	-141.73	5.58	-0.514337	-141.89	5.6	-0.483929	0.0304083	down	down	down	down	up	up	up	down
chr1A_362210041	G > A	-	synonymous_variant	TraesCS1A02G201300	TraesCS1A02G201300.1	Gly > Gly	-144.6	-142.27	5.59	-0.416816	-142.73	5.73	-0.326353	0.0904632	down	down	down	down	up	up	up	down
chr1A_362210044	A > G	-	synonymous_variant	TraesCS1A02G201300	TraesCS1A02G201300.1	Arg > Arg	-144.6	-141.16	6.46	-0.532508	-142.81	5.71	-0.313485	0.219023	down	down	down	down	up	up	up	down
chr1A_452020765	G > T	+	synonymous_variant	TraesCS1A02G258800	TraesCS1A02G258800.1	Gly > Gly	-226.4	-201.23	12.09	-2.08189	-202.09	11.87	-2.04802	0.0338656	down	down	down	down	down	down	down	down
chr1A_452020771	C > T	+	synonymous_variant	TraesCS1A02G258800	TraesCS1A02G258800.1	Asp > Asp	-226.4	-200.86	11.98	-2.13189	-200.38	12.22	-2.1293	0.00259024	down	down	down	down	down	down	down	down
chr1A_452020810	C > T	+	synonymous_variant	TraesCS1A02G258800	TraesCS1A02G258800.1	Asp > Asp	-226.4	-200.99	12.62	-2.01347	-203.19	11.38	-2.03954	-0.0260724	down	down	down	down	down	down	down	down
chr1A_452020822	G > A	+	synonymous_variant	TraesCS1A02G258800	TraesCS1A02G258800.1	Glu > Glu	-226.4	-200.04	12.61	-2.0904	-201.22	12.97	-1.9414	0.149001	down	down	down	down	down	down	down	down
chr1B_512174375	G > A	-	synonymous_variant	TraesCS1B02G294300	TraesCS1B02G294300.1	Arg > Arg	-209.36	-207.62	11	-0.158182	-206.9	13.38	-0.183857	-0.0256747	down	down	down	down	down	up	down	down
chr1B_512174382	G > T	-	nonsynonymous_variant	TraesCS1B02G294300	TraesCS1B02G294300.1	Ser > Tyr	-209.36	-207.53	12.63	-0.144893	-205.72	12.64	-0.287975	-0.143082	down	down	down	down	down	up	down	down
chr1B_512174383	A > T	-	nonsynonymous_variant	TraesCS1B02G294300	TraesCS1B02G294300.1	Ser > Thr	-209.36	-207.33	12.27	-0.165444	-206.31	12.8	-0.238281	-0.0728371	down	down	down	down	down	up	down	down
chr1B_512174399	C > A	-	synonymous_variant	TraesCS1B02G294300	TraesCS1B02G294300.1	Pro > Pro	-209.36	-206.52	12.55	-0.226295	-208.09	13.14	-0.0966514	0.129643	down	down	down	down	down	up	down	down
chr1B_512174402	G > A	-	synonymous_variant	TraesCS1B02G294300	TraesCS1B02G294300.1	Val > Val	-209.36	-208.4	12.08	-0.0794702	-207.27	12.28	-0.170195	-0.0907252	down	down	down	down	down	up	down	down
chr1D_351247689	T > G	+	nonsynonymous_variant	TraesCS1D02G258800	TraesCS1D02G258800.1	Ser > Ala	-221.5	-201.29	12.08	-1.67301	-199.83	11.18	-1.93828	-0.265269	down	down	down	down	down	down	down	down
chr1D_351247692	A > G	+	nonsynonymous_variant	TraesCS1D02G258800	TraesCS1D02G258800.1	Ile > Val	-221.5	-202.1	13.83	-1.40275	-202.25	11.83	-1.62722	-0.224471	down	down	down	down	down	down	down	down
chr1D_351247703	G > C	+	nonsynonymous_variant	TraesCS1D02G258800	TraesCS1D02G258800.1	Met > Ile	-221.5	-202.18	10.83	-1.78393	-202.02	12.63	-1.54236	0.241574	down	down	down	down	down	down	down	down
chr1D_351247708	G > A	+	nonsynonymous_variant	TraesCS1D02G258800	TraesCS1D02G258800.1	Arg > Lys	-221.5	-204.44	11.89	-1.43482	-202.93	12.07	-1.53853	-0.103706	down	down	down	down	down	down	down	down
chr1D_351247769	T > A	+	synonymous_variant	TraesCS1D02G258800	TraesCS1D02G258800.1	Thr > Thr	-221.5	-203.61	13.11	-1.36461	-200.34	12.97	-1.63146	-0.26685	down	down	down	down	down	down	down	down
chr1D_351247770	G > A	+	nonsynonymous_variant	TraesCS1D02G258800	TraesCS1D02G258800.1	Gly > Ser	-221.5	-202.01	12.26	-1.58972	-202.2	13.13	-1.46992	0.119806	down	down	down	down	down	down	down	down
chr1D_351247778	G > T	+	synonymous_variant	TraesCS1D02G258800	TraesCS1D02G258800.1	Gly > Gly	-221.5	-201.21	12.26	-1.65498	-201.2	11.71	-1.73356	-0.0785855	down	down	down	down	down	down	down	down
chr1D_351247793	G > A	+	synonymous_variant	TraesCS1D02G258800	TraesCS1D02G258800.1	Glu > Glu	-221.5	-202.1	10	-1.94	-201.58	14.16	-1.40678	0.53322	down	down	down	down	down	down	down	down
chr1D_351247799	T > C	+	synonymous_variant	TraesCS1D02G258800	TraesCS1D02G258800.1	Thr > Thr	-221.5	-201.32	10.83	-1.86334	-202.32	12.8	-1.49844	0.364905	down	down	down	down	down	down	down	down
chr1D_427619130	C > T	-	nonsynonymous_variant	TraesCS1D02G338400	TraesCS1D02G338400.1	Val > Ile	-149.29	-159.9	10.37	1.02314	-160.48	10.24	1.09277	0.0696298	up	down	up	up	down	up	up	up
chr1D_66556087	G > T	+	synonymous_variant	TraesCS1D02G083600	TraesCS1D02G083600.1	Gly > Gly	-167.52	-164.05	10.86	-0.319521	-164.24	10.01	-0.327672	-0.00815115	up	up	up	up	down	down	down	up
chr2A_38305258	T > C	+	synonymous_variant	TraesCS2A02G083300	TraesCS2A02G083300.1	Asp > Asp	-170.3	-180.02	10.5	0.925714	-182.57	10.68	1.14888	0.223162	up	up	up	up	down	up	up	up
chr2A_38305264	T > C	+	synonymous_variant	TraesCS2A02G083300	TraesCS2A02G083300.1	Pro > Pro	-170.3	-181.34	10.95	1.00822	-181	10.52	1.01711	0.00889109	up	up	up	up	down	up	up	up
chr2A_38305303	C > T	+	synonymous_variant	TraesCS2A02G083300	TraesCS2A02G083300.1	Thr > Thr	-170.3	-181.48	11.09	1.00812	-182.08	10.73	1.09786	0.0897411	up	up	up	up	down	up	up	up
chr2A_38305312	T > C	+	synonymous_variant	TraesCS2A02G083300	TraesCS2A02G083300.1	Ala > Ala	-170.3	-181.82	9.7	1.18763	-181.44	11.53	0.966175	-0.221454	up	up	up	up	down	up	up	up
chr2B_190659662	G > C	+	synonymous_variant	TraesCS2B02G209100	TraesCS2B02G209100.1	Ser > Ser	-171.8	-178.8	7.82	0.895141	-179.4	7.97	0.953576	0.0584352	down	down	up	down	up	down	down	down
chr2D_123097910	T > C	+	synonymous_variant	TraesCS2D02G179300	TraesCS2D02G179300.1	Val > Val	-203.6	-194.82	7.1	-1.23662	-196.66	9.37	-0.740662	0.495958	up	down	up	down	up	down	up	down
chr2D_520582908	G > T	-	synonymous_variant	TraesCS2D02G405500	TraesCS2D02G405500.1	Arg > Arg	-192.21	-178.41	9.56	-1.44351	-176.69	8.51	-1.82374	-0.380222	up	up	up	up	down	up	up	up
chr2D_520582920	C > G	-	synonymous_variant	TraesCS2D02G405500	TraesCS2D02G405500.1	Leu > Leu	-192.21	-176.67	9.32	-1.66738	-176.19	8.79	-1.82253	-0.155144	up	up	up	up	down	up	up	up
chr2D_520582943	G > A	-	synonymous_variant	TraesCS2D02G405500	TraesCS2D02G405500.1	Leu > Leu	-192.21	-176.36	8.83	-1.79502	-177.02	8.31	-1.82792	-0.0329012	up	up	up	up	down	up	up	up
chr2D_520582953	G > A	-	synonymous_variant	TraesCS2D02G405500	TraesCS2D02G405500.1	Asp > Asp	-192.21	-177.08	9.65	-1.56788	-178.53	10.25	-1.33463	0.233242	up	up	up	up	down	up	up	up
chr2D_520582988	C > A	-	nonsynonymous_variant	TraesCS2D02G405500	TraesCS2D02G405500.1	Ala > Ser	-192.21	-177.85	9.65	-1.48808	-176.76	9.51	-1.62461	-0.136523	up	up	up	up	down	up	up	up
chr3A_487854715	C > G	-	nonsynonymous_variant	TraesCS3A02G263900	TraesCS3A02G263900.1	Glu > Asp	-210.1	-194.73	10.75	-1.42977	-192.51	13.75	-1.27927	0.150495	up	down	down	down	up	up	up	down
chr3A_487854745	G > T	-	synonymous_variant	TraesCS3A02G263900	TraesCS3A02G263900.1	Arg > Arg	-210.1	-193.99	11.72	-1.37457	-192.25	12.93	-1.38051	-0.00593706	up	down	down	down	up	up	up	down
chr3A_487854754	G > A	-	synonymous_variant	TraesCS3A02G263900	TraesCS3A02G263900.1	Ser > Ser	-210.1	-193.3	12.46	-1.34831	-197.44	10.57	-1.19773	0.150585	up	down	down	down	up	up	up	down
chr3A_487854757	C > A	-	synonymous_variant	TraesCS3A02G263900	TraesCS3A02G263900.1	Ala > Ala	-210.1	-193.27	12.85	-1.30973	-191.24	12.99	-1.45189	-0.142158	up	down	down	down	up	up	up	down
chr3A_487854758	G > C	-	nonsynonymous_variant	TraesCS3A02G263900	TraesCS3A02G263900.1	Ala > Gly	-210.1	-193.02	11.21	-1.52364	-196.04	11.72	-1.19966	0.323981	up	down	down	down	up	up	up	down
chr3A_487854760	C > G	-	synonymous_variant	TraesCS3A02G263900	TraesCS3A02G263900.1	Ser > Ser	-210.1	-194	11.89	-1.35408	-191.28	12.68	-1.48423	-0.130148	up	down	down	down	up	up	up	down
chr3A_487854763	G > A	-	synonymous_variant	TraesCS3A02G263900	TraesCS3A02G263900.1	Val > Val	-210.1	-194.53	12.44	-1.25161	-192.09	11.66	-1.5446	-0.292989	up	down	down	down	up	up	up	down
chr3A_56390500	G > A	-	nonsynonymous_variant	TraesCS3A02G087300	TraesCS3A02G087300.1	Pro > Leu	-226.5	-216.74	13.79	-0.707759	-214.37	13.33	-0.909977	-0.202218	up	up	down	up	up	up	up	up
chr3A_56390503	T > A	-	nonsynonymous_variant	TraesCS3A02G087300	TraesCS3A02G087300.1	Glu > Val	-226.5	-215.39	13.13	-0.846154	-216.33	14.2	-0.716197	0.129957	up	up	down	up	up	up	up	up
chr3D_441147419	T > C	+	synonymous_variant	TraesCS3D02G328300	TraesCS3D02G328300.1	Leu > Leu	-196.82	-191.65	7.61	-0.679369	-192.71	7.29	-0.563786	0.115583	down	down	down	down	down	down	down	down
chr3D_441147428	G > C	+	synonymous_variant	TraesCS3D02G328300	TraesCS3D02G328300.1	Val > Val	-196.82	-191.79	7.8	-0.644872	-193.44	8.09	-0.4178	0.227072	down	down	down	down	down	down	down	down
chr3D_441147542	C > G	+	synonymous_variant	TraesCS3D02G328300	TraesCS3D02G328300.1	Ala > Ala	-196.82	-193.81	8.1	-0.371605	-191.6	7.21	-0.723994	-0.35239	down	down	down	down	down	down	down	down
chr3D_441147566	T > C	+	synonymous_variant	TraesCS3D02G328300	TraesCS3D02G328300.1	Ser > Ser	-196.82	-192.58	6.9	-0.614493	-192.82	7.5	-0.533333	0.0811594	down	down	down	down	down	down	down	down
chr4A_109424377	A > C	+	nonsynonymous_variant	TraesCS4A02G097900	TraesCS4A02G097900.1	Met > Leu	-211.96	-193.96	11.18	-1.61002	-192.47	13.31	-1.46431	0.145705	up	up	up	up	down	up	up	up
chr4A_109424379	G > C	+	nonsynonymous_variant	TraesCS4A02G097900	TraesCS4A02G097900.1	Met > Ile	-211.96	-194.62	11.4	-1.52105	-190.39	14.04	-1.53632	-0.0152722	up	up	up	up	down	up	up	up
chr4A_109424382	G > T	+	synonymous_variant	TraesCS4A02G097900	TraesCS4A02G097900.1	Arg > Arg	-211.96	-191.72	12.01	-1.68526	-193.1	12.29	-1.53458	0.150681	up	up	up	up	down	up	up	up
chr4A_109424394	G > A	+	synonymous_variant	TraesCS4A02G097900	TraesCS4A02G097900.1	Glu > Glu	-211.96	-190.19	13.46	-1.61738	-191.96	13.49	-1.48258	0.134805	up	up	up	up	down	up	up	up
chr4A_124405655	A > G	-	synonymous_variant	TraesCS4A02G107600	TraesCS4A02G107600.1	Ile > Ile	-172.73	-172.58	10.21	-0.0146915	-172.33	9.43	-0.0424178	-0.0277263	down	down	down	down	down	down	down	down
chr4A_124405661	G > A	-	synonymous_variant	TraesCS4A02G107600	TraesCS4A02G107600.1	Ile > Ile	-172.73	-173.76	10.37	0.099325	-173.16	11.58	0.037133	-0.062192	down	down	down	down	down	down	down	down
chr4A_124405673	C > A	-	nonsynonymous_variant	TraesCS4A02G107600	TraesCS4A02G107600.1	Arg > Ser	-172.73	-173.63	9.93	0.0906344	-172.83	11.45	0.00873362	-0.0819008	down	down	down	down	down	down	down	down
chr4A_124405675	T > G	-	synonymous_variant	TraesCS4A02G107600	TraesCS4A02G107600.1	Arg > Arg	-172.73	-172.66	10.56	-0.00662879	-173.08	10.23	0.0342131	0.0408419	down	down	down	down	down	down	down	down
chr4A_124405688	C > T	-	synonymous_variant	TraesCS4A02G107600	TraesCS4A02G107600.1	Lys > Lys	-172.73	-176.03	10.1	0.326733	-172.37	10.03	-0.0358923	-0.362625	down	down	down	down	down	down	down	down
chr4A_124405703	C > A	-	synonymous_variant	TraesCS4A02G107600	TraesCS4A02G107600.1	Val > Val	-172.73	-175.1	11.69	0.202737	-171.52	11	-0.11	-0.312737	down	down	down	down	down	down	down	down
chr4A_124405841	A > G	-	synonymous_variant	TraesCS4A02G107600	TraesCS4A02G107600.1	Ile > Ile	-172.73	-174.05	11.25	0.117333	-175.73	9.14	0.328228	0.210894	down	down	down	down	down	down	down	down
chr4A_124405847	C > G	-	synonymous_variant	TraesCS4A02G107600	TraesCS4A02G107600.1	Val > Val	-172.73	-172.88	9.83	0.0152594	-173.7	11.46	0.0846422	0.0693828	down	down	down	down	down	down	down	down
chr4A_124405852	T > C	-	nonsynonymous_variant	TraesCS4A02G107600	TraesCS4A02G107600.1	Ile > Val	-172.73	-175.27	11.94	0.21273	-175.23	10.29	0.242954	0.030224	down	down	down	down	down	down	down	down
chr4A_124405856	G > A	-	synonymous_variant	TraesCS4A02G107600	TraesCS4A02G107600.1	Ile > Ile	-172.73	-174.93	11.63	0.189166	-171.72	10.65	-0.0948357	-0.284002	down	down	down	down	down	down	down	down
chr4A_124405858	T > G	-	nonsynonymous_variant	TraesCS4A02G107600	TraesCS4A02G107600.1	Ile > Leu	-172.73	-173.48	9.59	0.0782065	-174.2	10.42	0.141075	0.0628684	down	down	down	down	down	down	down	down
chr4A_163818831	T > C	+	synonymous_variant	TraesCS4A02G126700	TraesCS4A02G126700.1	Asp > Asp	-170.4	-166.39	7.16	-0.560056	-165.92	6.04	-0.741722	-0.181666	up	up	up	up	up	up	up	up
chr4A_163818834	C > T	+	synonymous_variant	TraesCS4A02G126700	TraesCS4A02G126700.1	Ala > Ala	-170.4	-166.13	6.32	-0.675633	-165.24	5.67	-0.910053	-0.23442	up	up	up	up	up	up	up	up
chr4A_163818837	T > C	+	synonymous_variant	TraesCS4A02G126700	TraesCS4A02G126700.1	Asp > Asp	-170.4	-166.37	6.35	-0.634646	-165.63	5.92	-0.805743	-0.171098	up	up	up	up	up	up	up	up
chr4A_163818838	G > A	+	nonsynonymous_variant	TraesCS4A02G126700	TraesCS4A02G126700.1	Gly > Ser	-170.4	-165.47	6.55	-0.752672	-164.51	5.95	-0.989916	-0.237244	up	up	up	up	up	up	up	up
chr4A_163818839	G > A	+	nonsynonymous_variant	TraesCS4A02G126700	TraesCS4A02G126700.1	Gly > Asp	-170.4	-166.03	5.81	-0.752151	-164.69	6.17	-0.925446	-0.173294	up	up	up	up	up	up	up	up
chr4A_163818861	G > T	+	synonymous_variant	TraesCS4A02G126700	TraesCS4A02G126700.1	Pro > Pro	-170.4	-165.17	6.7	-0.780597	-165.69	6.56	-0.717988	0.0626092	up	up	up	up	up	up	up	up
chr4A_163818870	C > T	+	synonymous_variant	TraesCS4A02G126700	TraesCS4A02G126700.1	Leu > Leu	-170.4	-165.02	5.61	-0.959002	-165.4	6.71	-0.745156	0.213845	up	up	up	up	up	up	up	up
chr4A_163818872	A > C	+	nonsynonymous_variant	TraesCS4A02G126700	TraesCS4A02G126700.1	Asn > Thr	-170.4	-166.08	6.77	-0.638109	-167.35	6.11	-0.499182	0.138928	up	up	up	up	up	up	up	up
chr4A_163818874	C > A	+	nonsynonymous_variant	TraesCS4A02G126700	TraesCS4A02G126700.1	Leu > Met	-170.4	-165.87	6.64	-0.682229	-164.39	6.48	-0.927469	-0.24524	up	up	up	up	up	up	up	up
chr4A_163818882	T > G	+	synonymous_variant	TraesCS4A02G126700	TraesCS4A02G126700.1	Ala > Ala	-170.4	-165.68	6.37	-0.740973	-166.37	5.71	-0.705779	0.035194	up	up	up	up	up	up	up	up
chr4A_163818906	G > C	+	synonymous_variant	TraesCS4A02G126700	TraesCS4A02G126700.1	Ser > Ser	-170.4	-165.15	6.68	-0.785928	-166.8	5.96	-0.604027	0.181901	up	up	up	up	up	up	up	up
chr4A_163819011	A > C	+	synonymous_variant	TraesCS4A02G126700	TraesCS4A02G126700.1	Leu > Leu	-170.4	-165.87	6.07	-0.746293	-166.89	6.53	-0.537519	0.208774	up	up	up	up	up	up	up	up
chr4A_163819014	G > C	+	synonymous_variant	TraesCS4A02G126700	TraesCS4A02G126700.1	Thr > Thr	-170.4	-167.23	6.7	-0.473134	-164.98	6.08	-0.891447	-0.418313	up	up	up	up	up	up	up	up
chr4A_163819026	C > T	+	synonymous_variant	TraesCS4A02G126700	TraesCS4A02G126700.1	Val > Val	-170.4	-165.45	6.66	-0.743243	-164.68	5.94	-0.962963	-0.21972	up	up	up	up	up	up	up	up
chr4A_163819029	C > T	+	synonymous_variant	TraesCS4A02G126700	TraesCS4A02G126700.1	Asp > Asp	-170.4	-165.91	6.25	-0.7184	-165.13	6.29	-0.837838	-0.119438	up	up	up	up	up	up	up	up
chr4A_163819041	C > G	+	synonymous_variant	TraesCS4A02G126700	TraesCS4A02G126700.1	Arg > Arg	-170.4	-166.45	6.08	-0.649671	-166.71	6.22	-0.593248	0.0564235	up	up	up	up	up	up	up	up
chr4A_469102263	C > G	+	synonymous_variant	TraesCS4A02G190500	TraesCS4A02G190500.1	Leu > Leu	-191.49	-191.33	6.96	-0.0229885	-193.37	7.8	0.241026	0.264014	up	up	up	up	up	up	up	up
chr4A_469102264	G > A	+	nonsynonymous_variant	TraesCS4A02G190500	TraesCS4A02G190500.1	Val > Ile	-191.49	-191.54	6.62	0.00755287	-190.02	5.96	-0.246644	-0.254197	up	up	up	up	up	up	up	up
chr4A_469102283	A > T	+	nonsynonymous_variant	TraesCS4A02G190500	TraesCS4A02G190500.1	Tyr > Phe	-191.49	-191.82	6.62	0.0498489	-191.97	5.6	0.0857143	0.0358653	up	up	up	up	up	up	up	up
chr4B_168566902	A > G	+	nonsynonymous_variant	TraesCS4B02G128700	TraesCS4B02G128700.1	Ile > Val	-219.51	-212.51	11.37	-0.615655	-213.3	11.83	-0.524937	0.0907186	down	down	up	up	up	down	up	down
chr4B_390280808	C > T	+	synonymous_variant	TraesCS4B02G178200	TraesCS4B02G178200.1	Leu > Leu	-165.21	-164.89	5.89	-0.0543294	-163.04	5.89	-0.368421	-0.314092	up	up	up	up	up	up	up	up
chr4B_390280829	G > C	+	synonymous_variant	TraesCS4B02G178200	TraesCS4B02G178200.1	Val > Val	-165.21	-164.74	6.85	-0.0686131	-163.85	6.37	-0.213501	-0.144888	up	up	up	up	up	up	up	up
chr4B_390280835	G > T	+	synonymous_variant	TraesCS4B02G178200	TraesCS4B02G178200.1	Ala > Ala	-165.21	-164.97	6.24	-0.0384615	-163.44	6.07	-0.291598	-0.253136	up	up	up	up	up	up	up	up
chr4B_390280839	G > A	+	nonsynonymous_variant	TraesCS4B02G178200	TraesCS4B02G178200.1	Gly > Ser	-165.21	-163.69	6.32	-0.240506	-163.27	6.44	-0.301242	-0.0607359	up	up	up	up	up	up	up	up
chr4B_390280840	G > A	+	nonsynonymous_variant	TraesCS4B02G178200	TraesCS4B02G178200.1	Gly > Asp	-165.21	-164.23	5.82	-0.168385	-162.68	6.55	-0.38626	-0.217875	up	up	up	up	up	up	up	up
chr4B_390280862	G > T	+	synonymous_variant	TraesCS4B02G178200	TraesCS4B02G178200.1	Pro > Pro	-165.21	-163.99	6.25	-0.1952	-164.14	6.2	-0.172581	0.0226194	up	up	up	up	up	up	up	up
chr4B_390280871	C > T	+	synonymous_variant	TraesCS4B02G178200	TraesCS4B02G178200.1	Leu > Leu	-165.21	-164.65	6.35	-0.088189	-164.75	6.95	-0.0661871	0.0220019	up	up	up	up	up	up	up	up
chr4B_390280873	A > C	+	nonsynonymous_variant	TraesCS4B02G178200	TraesCS4B02G178200.1	Asn > Thr	-165.21	-165.34	6.88	0.0188953	-165.39	5.55	0.0324324	0.0135371	up	up	up	up	up	up	up	up
chr4B_390280875	C > A	+	nonsynonymous_variant	TraesCS4B02G178200	TraesCS4B02G178200.1	Leu > Met	-165.21	-164.69	6.57	-0.0791476	-162.76	7	-0.35	-0.270852	up	up	up	up	up	up	up	up
chr4B_390280883	T > G	+	synonymous_variant	TraesCS4B02G178200	TraesCS4B02G178200.1	Ala > Ala	-165.21	-164.6	6.04	-0.100993	-165.64	6.49	0.0662558	0.167249	up	up	up	up	up	up	up	up
chr4B_513725918	T > C	-	synonymous_variant	TraesCS4B02G248500	TraesCS4B02G248500.1	Leu > Leu	-159.22	-152.71	8.66	-0.751732	-151.88	9.59	-0.765381	-0.0136485	up	up	up	down	up	up	up	down
chr4D_124260478	A > G	-	synonymous_variant	TraesCS4D02G140800	TraesCS4D02G140800.1	Tyr > Tyr	-192.9	-179.79	11.52	-1.13802	-178.93	10.98	-1.27231	-0.134292	down	down	down	down	down	down	down	down
chr4D_124260481	A > G	-	synonymous_variant	TraesCS4D02G140800	TraesCS4D02G140800.1	Val > Val	-192.9	-179.02	10.79	-1.28638	-178.5	10.67	-1.34958	-0.063202	down	down	down	down	down	down	down	down
chr4D_124260511	A > G	-	synonymous_variant	TraesCS4D02G140800	TraesCS4D02G140800.1	Ser > Ser	-192.9	-179.29	11.26	-1.2087	-179.62	11.06	-1.20072	0.00798005	down	down	down	down	down	down	down	down
chr4D_124260515	T > A	-	nonsynonymous_variant	TraesCS4D02G140800	TraesCS4D02G140800.1	Tyr > Phe	-192.9	-178	10.54	-1.41366	-179.1	11.79	-1.17048	0.243179	down	down	down	down	down	down	down	down
chr4D_124260520	G > A	-	synonymous_variant	TraesCS4D02G140800	TraesCS4D02G140800.1	Ser > Ser	-192.9	-178.69	10.33	-1.37561	-179.44	9.99	-1.34735	0.0282577	down	down	down	down	down	down	down	down
chr4D_355859968	G > A	-	synonymous_variant	TraesCS4D02G207500	TraesCS4D02G207500.1	Arg > Arg	-214.36	-190.94	13.29	-1.76223	-190.16	12.82	-1.88768	-0.125448	up	up	up	up	down	up	up	up
chr4D_355860059	T > G	-	nonsynonymous_variant	TraesCS4D02G207500	TraesCS4D02G207500.1	Asn > Thr	-214.36	-189.48	13.26	-1.87632	-191.16	12.67	-1.8311	0.0452227	up	up	up	up	down	up	up	up
chr4D_355860061	G > A	-	synonymous_variant	TraesCS4D02G207500	TraesCS4D02G207500.1	Leu > Leu	-214.36	-188.87	13.9	-1.83381	-189.03	12.75	-1.98667	-0.152854	up	up	up	up	down	up	up	up
chr4D_355860064	C > A	-	synonymous_variant	TraesCS4D02G207500	TraesCS4D02G207500.1	Val > Val	-214.36	-190.77	12.61	-1.87074	-190.48	12.88	-1.85404	0.0167002	up	up	up	up	down	up	up	up
chr4D_355860084	C > G	-	nonsynonymous_variant	TraesCS4D02G207500	TraesCS4D02G207500.1	Glu > Gln	-214.36	-189.63	11.79	-2.09754	-192.16	13.05	-1.70115	0.396391	up	up	up	up	down	up	up	up
chr4D_355860088	C > A	-	synonymous_variant	TraesCS4D02G207500	TraesCS4D02G207500.1	Ser > Ser	-214.36	-192.36	13.96	-1.57593	-191.99	11.89	-1.88141	-0.305482	up	up	up	up	down	up	up	up
chr4D_483138160	C > T	+	synonymous_variant	TraesCS4D02G319400	TraesCS4D02G319400.1	Ser > Ser	-226.9	-229.48	15.12	0.170635	-228.62	12.82	0.134165	-0.0364696	down	down	down	down	up	down	down	down
chr5A_95568180	T > C	+	synonymous_variant	TraesCS5A02G078000	TraesCS5A02G078000.1	Pro > Pro	-191.2	-179.98	11.85	-0.946835	-179.6	10.93	-1.0613	-0.114464	down	down	down	down	down	down	down	down
chr5B_530613607	A > C	+	synonymous_variant	TraesCS5B02G349100	TraesCS5B02G349100.1	Gly > Gly	-125.1	-136.92	5.84	2.02397	-135.97	5.65	1.92389	-0.100079	down	down	down	up	up	up	down	down
chr5B_530613610	C > A	+	synonymous_variant	TraesCS5B02G349100	TraesCS5B02G349100.1	Gly > Gly	-125.1	-135.73	5.94	1.78956	-134.27	5.34	1.71723	-0.0723338	down	down	down	up	up	up	down	down
chr5B_530613619	G > C	+	synonymous_variant	TraesCS5B02G349100	TraesCS5B02G349100.1	Leu > Leu	-125.1	-134.7	5.35	1.79439	-134.87	5.63	1.73535	-0.0590462	down	down	down	up	up	up	down	down
chr5B_530613628	C > T	+	synonymous_variant	TraesCS5B02G349100	TraesCS5B02G349100.1	Gly > Gly	-125.1	-136.33	5.55	2.02342	-135.27	5.09	1.99804	-0.0253881	down	down	down	up	up	up	down	down
chr5B_530613631	C > T	+	synonymous_variant	TraesCS5B02G349100	TraesCS5B02G349100.1	Gly > Gly	-125.1	-134.34	5.89	1.56876	-135.39	5.54	1.8574	0.28864	down	down	down	up	up	up	down	down
chr5B_530613640	C > T	+	synonymous_variant	TraesCS5B02G349100	TraesCS5B02G349100.1	Arg > Arg	-125.1	-135.54	5.42	1.9262	-135.28	6.24	1.63141	-0.294789	down	down	down	up	up	up	down	down
chr5B_530613646	G > A	+	synonymous_variant	TraesCS5B02G349100	TraesCS5B02G349100.1	Arg > Arg	-125.1	-135.22	5.75	1.76	-133.19	5.86	1.38055	-0.379454	down	down	down	up	up	up	down	down
chr5B_530613650	G > A	+	nonsynonymous_variant	TraesCS5B02G349100	TraesCS5B02G349100.1	Val > Ile	-125.1	-135.81	4.8	2.23125	-134.84	5.67	1.71781	-0.513437	down	down	down	up	up	up	down	down
chr5B_530613653	C > T	+	nonsynonymous_variant	TraesCS5B02G349100	TraesCS5B02G349100.1	Leu > Phe	-125.1	-136.04	5.14	2.1284	-133.69	4.96	1.73185	-0.39655	down	down	down	up	up	up	down	down
chr5B_530613655	C > G	+	synonymous_variant	TraesCS5B02G349100	TraesCS5B02G349100.1	Leu > Leu	-125.1	-134.1	6.03	1.49254	-136.18	6.14	1.80456	0.312023	down	down	down	up	up	up	down	down
chr5B_530613658	C > A	+	synonymous_variant	TraesCS5B02G349100	TraesCS5B02G349100.1	Arg > Arg	-125.1	-135.24	5.7	1.77895	-134.05	5.49	1.63024	-0.148711	down	down	down	up	up	up	down	down
chr5B_530613679	C > A	+	synonymous_variant	TraesCS5B02G349100	TraesCS5B02G349100.1	Thr > Thr	-125.1	-134.81	6.46	1.5031	-135.35	6.14	1.66938	0.166285	down	down	down	up	up	up	down	down
chr6A_91424479	G > T	+	nonsynonymous_variant&splice_region_variant	TraesCS6A02G119700	TraesCS6A02G119700.1	Ala > Ser	-180.6	-156.05	6.07	-4.04448	-154.33	6.49	-4.04777	-0.00328474	down	up	down	up	down	down	up	up
chr6A_91424508	T > C	+	synonymous_variant	TraesCS6A02G119700	TraesCS6A02G119700.1	Pro > Pro	-180.6	-154.99	6.61	-3.87443	-154.94	6.28	-4.08599	-0.211555	down	up	down	up	down	down	up	up
chr6B_149055266	G > T	+	nonsynonymous_variant	TraesCS6B02G148000	TraesCS6B02G148000.1	Ala > Ser	-174.7	-170.25	9.5	-0.468421	-169.89	8.95	-0.53743	-0.0690091	up	up	up	up	down	down	up	up
chr6B_149055289	C > T	+	synonymous_variant	TraesCS6B02G148000	TraesCS6B02G148000.1	Gly > Gly	-174.7	-169.91	8.67	-0.55248	-170.6	8.87	-0.462232	0.0902476	up	up	up	up	down	down	up	up
chr6B_149055310	C > A	+	synonymous_variant	TraesCS6B02G148000	TraesCS6B02G148000.1	Arg > Arg	-174.7	-171.1	9.06	-0.397351	-168.63	8.21	-0.739342	-0.341991	up	up	up	up	down	down	up	up
chr6B_149055389	C > T	+	nonsynonymous_variant	TraesCS6B02G148000	TraesCS6B02G148000.1	Leu > Phe	-174.7	-170.79	9.12	-0.428728	-169.91	8.05	-0.595031	-0.166303	up	up	up	up	down	down	up	up
chr6B_149055391	T > G	+	synonymous_variant	TraesCS6B02G148000	TraesCS6B02G148000.1	Leu > Leu	-174.7	-169.7	8.44	-0.592417	-171.77	9.67	-0.302999	0.289418	up	up	up	up	down	down	up	up
chr6B_149055802	C > A	+	synonymous_variant	TraesCS6B02G148000	TraesCS6B02G148000.1	Arg > Arg	-174.7	-170.89	8.89	-0.428571	-171.1	8.65	-0.416185	0.0123865	up	up	up	up	down	down	up	up
chr6B_171728092	G > A	-	synonymous_variant	TraesCS6B02G164600	TraesCS6B02G164600.1	Gly > Gly	-187.7	-174.86	8.44	-1.52133	-175.94	9.61	-1.22373	0.297602	down	up	down	up	down	down	down	up
chr6B_171728107	G > T	-	synonymous_variant	TraesCS6B02G164600	TraesCS6B02G164600.1	Arg > Arg	-187.7	-175.39	8.91	-1.38159	-174.61	10.11	-1.29476	0.086836	down	up	down	up	down	down	down	up
chr6B_55694957	T > A	-	synonymous_variant	TraesCS6B02G079200	TraesCS6B02G079200.1	Gly > Gly	-145.7	-141.19	6.17	-0.730956	-140.87	6.22	-0.776527	-0.0455711	up	up	up	up	up	up	up	up
chr6B_55694969	G > A	-	synonymous_variant	TraesCS6B02G079200	TraesCS6B02G079200.1	Arg > Arg	-145.7	-140.68	5.12	-0.980469	-140.31	5.73	-0.940663	0.0398056	up	up	up	up	up	up	up	up
chr6B_55694978	G > T	-	synonymous_variant	TraesCS6B02G079200	TraesCS6B02G079200.1	Arg > Arg	-145.7	-140.28	5.59	-0.969589	-139.57	5.89	-1.04075	-0.0711585	up	up	up	up	up	up	up	up
chr6B_55695035	G > C	-	synonymous_variant	TraesCS6B02G079200	TraesCS6B02G079200.1	Thr > Thr	-145.7	-138.88	5.18	-1.3166	-141.18	5.78	-0.782007	0.534595	up	up	up	up	up	up	up	up
chr6B_55695203	G > A	-	synonymous_variant	TraesCS6B02G079200	TraesCS6B02G079200.1	Arg > Arg	-145.7	-140.65	5.87	-0.860307	-140.29	6.11	-0.885434	-0.0251271	up	up	up	up	up	up	up	up
chr6B_55695212	G > A	-	synonymous_variant	TraesCS6B02G079200	TraesCS6B02G079200.1	Gly > Gly	-145.7	-140.69	5.86	-0.854949	-140.75	6.1	-0.811475	0.0434734	up	up	up	up	up	up	up	up
chr6B_55695224	C > G	-	synonymous_variant	TraesCS6B02G079200	TraesCS6B02G079200.1	Leu > Leu	-145.7	-141.45	6.1	-0.696721	-139.57	5.41	-1.13309	-0.436366	up	up	up	up	up	up	up	up
chr6B_55695227	C > A	-	synonymous_variant	TraesCS6B02G079200	TraesCS6B02G079200.1	Gly > Gly	-145.7	-141.02	5.62	-0.83274	-139.2	5.87	-1.10733	-0.274585	up	up	up	up	up	up	up	up
chr6B_55695233	C > T	-	synonymous_variant	TraesCS6B02G079200	TraesCS6B02G079200.1	Gly > Gly	-145.7	-140.92	6.33	-0.755134	-138.59	5.54	-1.28339	-0.528259	up	up	up	up	up	up	up	up
chr6B_92532418	C > A	-	nonsynonymous_variant	TraesCS6B02G110300	TraesCS6B02G110300.1	Ala > Ser	-195.7	-183.55	9.14	-1.32932	-180.54	9.15	-1.65683	-0.327509	up	up	up	up	down	up	up	up
chr6D_470684693	G > T	+	synonymous_variant	TraesCS6D02G401900	TraesCS6D02G401900.1	Thr > Thr	-231.8	-183.34	10.99	-4.40946	-182.38	10.55	-4.68436	-0.274897	down	down	down	down	down	down	down	up
chr6D_470684697	A > G	+	nonsynonymous_variant	TraesCS6D02G401900	TraesCS6D02G401900.1	Ile > Val	-231.8	-185.21	10.06	-4.63121	-185.77	10.1	-4.55743	0.073787	down	down	down	down	down	down	down	up
chr7A_77150114	G > T	+	synonymous_variant	TraesCS7A02G119700	TraesCS7A02G119700.1	Thr > Thr	-175.4	-178.5	6.53	0.474732	-177.63	6.22	0.358521	-0.116211	down	down	down	down	up	up	down	down
chr7A_77150123	G > C	+	synonymous_variant	TraesCS7A02G119700	TraesCS7A02G119700.1	Thr > Thr	-175.4	-177.93	6.44	0.392857	-177.48	6.31	0.329635	-0.0632216	down	down	down	down	up	up	down	down
chr7A_77150129	C > A	+	synonymous_variant	TraesCS7A02G119700	TraesCS7A02G119700.1	Arg > Arg	-175.4	-178.88	6.52	0.533742	-177.72	6.24	0.371795	-0.161947	down	down	down	down	up	up	down	down
chr7A_77150138	C > T	+	synonymous_variant	TraesCS7A02G119700	TraesCS7A02G119700.1	Thr > Thr	-175.4	-179.47	6.92	0.58815	-177.92	5.63	0.447602	-0.140548	down	down	down	down	up	up	down	down
chr7A_77150219	C > T	+	synonymous_variant	TraesCS7A02G119700	TraesCS7A02G119700.1	Pro > Pro	-175.4	-177.7	6.17	0.372771	-178.62	6.39	0.503912	0.131141	down	down	down	down	up	up	down	down
chr7A_77150227	T > A	+	nonsynonymous_variant	TraesCS7A02G119700	TraesCS7A02G119700.1	Phe > Tyr	-175.4	-178.31	6.89	0.422351	-176.74	6.48	0.20679	-0.215561	down	down	down	down	up	up	down	down
chr7A_77150237	A > T	+	synonymous_variant	TraesCS7A02G119700	TraesCS7A02G119700.1	Gly > Gly	-175.4	-178.39	6.55	0.456489	-178.08	6.03	0.444444	-0.0120441	down	down	down	down	up	up	down	down
chr7A_77150263	A > G	+	nonsynonymous_variant	TraesCS7A02G119700	TraesCS7A02G119700.1	Lys > Arg	-175.4	-177.79	6.34	0.376972	-178.97	6.33	0.563981	0.187009	down	down	down	down	up	up	down	down
chr7A_77150321	G > T	+	synonymous_variant	TraesCS7A02G119700	TraesCS7A02G119700.1	Arg > Arg	-175.4	-178.14	5.93	0.462057	-176.78	5.88	0.234694	-0.227363	down	down	down	down	up	up	down	down
chr7A_77150327	C > T	+	synonymous_variant	TraesCS7A02G119700	TraesCS7A02G119700.1	Ile > Ile	-175.4	-178.87	6.29	0.551669	-177.53	6.65	0.320301	-0.231369	down	down	down	down	up	up	down	down
chr7A_77150330	G > T	+	synonymous_variant	TraesCS7A02G119700	TraesCS7A02G119700.1	Ala > Ala	-175.4	-179.08	6.76	0.544379	-176.47	6.87	0.15575	-0.388629	down	down	down	down	up	up	down	down
chr7A_77150343	A > T	+	nonsynonymous_variant	TraesCS7A02G119700	TraesCS7A02G119700.1	Thr > Ser	-175.4	-178.8	6.32	0.537975	-178.65	5.93	0.548061	0.010086	down	down	down	down	up	up	down	down
chr7A_77150345	C > T	+	synonymous_variant	TraesCS7A02G119700	TraesCS7A02G119700.1	Thr > Thr	-175.4	-177.74	5.92	0.39527	-178.39	6.99	0.427754	0.0324837	down	down	down	down	up	up	down	down
chr7A_77150348	C > T	+	synonymous_variant	TraesCS7A02G119700	TraesCS7A02G119700.1	Asp > Asp	-175.4	-178.39	6.88	0.434593	-177.61	5.81	0.380379	-0.0542144	down	down	down	down	up	up	down	down
chr7A_77150474	C > T	+	synonymous_variant	TraesCS7A02G119700	TraesCS7A02G119700.1	Asp > Asp	-175.4	-178.14	6.47	0.423493	-178.11	5.92	0.45777	0.0342772	down	down	down	down	up	up	down	down
#Note: Original MFE was the MFE of gene in the reference genome.

## Sheet: Table S8
Table S8. Prediction of the miRNA targeting sites of the RDD genes.
Gene	Before editing			After editing			RNA editing site	Editing position (CDS)
	miRNA	Target start	Target end	miRNA	Target start	Target end
TraesCS1B02G294300	-			tae-miR9661-5p	441	460	chr1B_512174399	450
TraesCS2A02G083300	tae-miR167b	875	895	tae-miR167b	875	895	chr2A_38305258	273
TraesCS2A02G083300							chr2A_38305264	279
TraesCS2A02G083300							chr2A_38305303	318
TraesCS2A02G083300							chr2A_38305312	327
TraesCS3A02G263900	tae-miR1124	654	675	tae-miR1124	654	675	chr3A_487854715	441
TraesCS3A02G263900	-			tae-miR9664-3p	426	446	chr3A_487854715	441
TraesCS3A02G263900	tae-miR1124	654	675	tae-miR1124	654	675	chr3A_487854745	411
TraesCS3A02G263900							chr3A_487854754	402
TraesCS3A02G263900							chr3A_487854757	399
TraesCS3A02G263900							chr3A_487854758	398
TraesCS3A02G263900							chr3A_487854760	396
TraesCS3A02G263900							chr3A_487854763	393
TraesCS4A02G097900	tae-miR2275-3p	1566	1587	tae-miR2275-3p	1566	1587	chr4A_109424377	520
TraesCS4A02G097900							chr4A_109424379	522
TraesCS4A02G097900							chr4A_109424382	525
TraesCS4A02G097900							chr4A_109424394	537
TraesCS4A02G097900	tae-miR531	1886	1906	tae-miR531	1886	1906	chr4A_109424377	520
TraesCS4A02G097900							chr4A_109424379	522
TraesCS4A02G097900							chr4A_109424382	525
TraesCS4A02G097900							chr4A_109424394	537
TraesCS4B02G128700	tae-miR531	90	110	tae-miR531	90	110	chr4B_168566902	469
TraesCS4B02G248500	tae-miR167b	1006	1026	tae-miR167b	1006	1026	chr4B_513725918	459
TraesCS4D02G140800	tae-miR9661-5p	444	463	tae-miR9661-5p	444	463	chr4D_124260478	1347
TraesCS4D02G140800							chr4D_124260481	1344
TraesCS4D02G140800							chr4D_124260511	1314
TraesCS4D02G140800							chr4D_124260515	1310
TraesCS4D02G140800							chr4D_124260520	1305
TraesCS4D02G140800	tae-miR530	1120	1140	tae-miR530	1120	1140	chr4D_124260478	1347
TraesCS4D02G140800							chr4D_124260481	1344
TraesCS4D02G140800							chr4D_124260511	1314
TraesCS4D02G140800							chr4D_124260515	1310
TraesCS4D02G140800							chr4D_124260520	1305
TraesCS4D02G140800	tae-miR9780	1906	1926	tae-miR9780	1906	1926	chr4D_124260478	1347
TraesCS4D02G140800							chr4D_124260481	1344
TraesCS4D02G140800							chr4D_124260511	1314
TraesCS4D02G140800							chr4D_124260515	1310
TraesCS4D02G140800							chr4D_124260520	1305
TraesCS4D02G207500	tae-miR2275-3p	1566	1587	tae-miR2275-3p	1566	1587	chr4D_355859968	384
TraesCS4D02G207500	tae-miR531	1886	1906	tae-miR531	1886	1906	chr4D_355859968	384
TraesCS4D02G207500	tae-miR9661-5p	444	463	tae-miR9661-5p	444	463	chr4D_355859968	384
TraesCS4D02G207500							chr4D_355860059	386
TraesCS4D02G207500							chr4D_355860061	381
TraesCS4D02G207500							chr4D_355860064	361
TraesCS4D02G207500							chr4D_355860084	477
TraesCS4D02G207500							chr4D_355860088	357
TraesCS4D02G207500	tae-miR2275-3p	1566	1587	tae-miR2275-3p	1566	1587	chr4D_355860059	386
TraesCS4D02G207500							chr4D_355860061	381
TraesCS4D02G207500							chr4D_355860064	361
TraesCS4D02G207500							chr4D_355860084	477
TraesCS4D02G207500							chr4D_355860088	357
TraesCS4D02G207500	tae-miR531	1886	1906	tae-miR531	1886	1906	chr4D_355860059	386
TraesCS4D02G207500							chr4D_355860061	381
TraesCS4D02G207500							chr4D_355860064	361
TraesCS4D02G207500							chr4D_355860084	477
TraesCS4D02G207500							chr4D_355860088	357
TraesCS4D02G319400	tae-miR9780	1255	1275	tae-miR9780	1255	1275	chr4D_483138160	690
TraesCS4D02G319400	tae-miR5086	705	725	tae-miR5086	705	725	chr4D_483138160	690
TraesCS7A02G119700	tae-miR5050	297	317	tae-miR5050	297	317	chr7A_77150114	12
TraesCS7A02G119700							chr7A_77150123	21
TraesCS7A02G119700							chr7A_77150129	27
TraesCS7A02G119700							chr7A_77150138	36
TraesCS7A02G119700							chr7A_77150219	117
TraesCS7A02G119700							chr7A_77150227	125
TraesCS7A02G119700							chr7A_77150237	135
TraesCS7A02G119700							chr7A_77150263	161
TraesCS7A02G119700							chr7A_77150321	219
TraesCS7A02G119700							chr7A_77150327	225
TraesCS7A02G119700							chr7A_77150330	228
TraesCS7A02G119700							chr7A_77150343	241
TraesCS7A02G119700							chr7A_77150345	243
TraesCS7A02G119700							chr7A_77150348	246
TraesCS7A02G119700							chr7A_77150474	372

## Sheet: Table S9
Table S9. Prediction of conserved domain in RDD-containing genes.
Gene	Orthologues	Editing site	Strand	Editing position (CDS)	CSC (Coding sequence changes)	Editing position (Peptide)	AAC (Amino acid changes)	Transcript	Model	Description	score	Evalue	hmmfrom	hmm to	alifrom	ali to
TraesCS1A02G201300	-	chr1A_362210018	-	194	A > G	65	Asn > Ser	TraesCS1A02G201300.1	CENP-T_C	Centromere kinetochore component CENP-T histone fold	34.5	1e-12	19	79	36	96
		chr1A_362210019	-	193	A > G	65	Asn > Asp	TraesCS1A02G201300.1	CENP-T_C	Centromere kinetochore component CENP-T histone fold	34.5	1e-12	19	79	36	96
		chr1A_362210030	-	182	T > C	61	Ile > Thr	TraesCS1A02G201300.1	CENP-T_C	Centromere kinetochore component CENP-T histone fold	34.5	1e-12	19	79	36	96
TraesCS1B02G294300	AtHSP70-4	chr1B_512174382	-	467	C > A	156	Ser > Tyr	TraesCS1B02G294300.1	HSP70	Hsp70 protein	869.5	1.1e-265	1	599	8	617
			-	467	C > A	156	Ser > Tyr	TraesCS1B02G294300.1	MreB_Mbl	MreB/Mbl protein	52.6	3.3e-18	92	316	141	379
		chr1B_512174383	-	466	T > A	156	Ser > Thr	TraesCS1B02G294300.1	HSP70	Hsp70 protein	869.5	1.1e-265	1	599	8	617
			-	466	T > A	156	Ser > Thr	TraesCS1B02G294300.1	MreB_Mbl	MreB/Mbl protein	52.6	3.3e-18	92	316	141	379
TraesCS1D02G258800	AtTUBB6	chr1D_351247689	+	1117	T > G	373	Ser > Ala	TraesCS1D02G258800.1	Tubulin_C	Tubulin C-terminal domain	131.7	1.8e-42	1	125	261	382
		chr1D_351247692	+	1120	A > G	374	Ile > Val	TraesCS1D02G258800.1	Tubulin_C	Tubulin C-terminal domain	131.7	1.8e-42	1	125	261	382
		chr1D_351247703	+	1131	G > C	377	Met > Ile	TraesCS1D02G258800.1	Tubulin_C	Tubulin C-terminal domain	131.7	1.8e-42	1	125	261	382
		chr1D_351247708	+	1136	G > A	379	Arg > Lys	TraesCS1D02G258800.1	Tubulin_C	Tubulin C-terminal domain	131.7	1.8e-42	1	125	261	382
TraesCS1D02G338400	EIF2 GAMMA	chr1D_427619130	-	1315	G > A	439	Val > Ile	TraesCS1D02G338400.1	eIF2_C	Initiation factor eIF2 gamma, C terminal	112.7	1.2e-36	2	86	362	451
TraesCS2D02G405500	rubi3	chr2D_520582988	-	535	G > T	179	Ala > Ser	TraesCS2D02G405500.1	ubiquitin	Ubiquitin family	114.5	6.1e-37	1	72	154	225
			-	535	G > T	179	Ala > Ser	TraesCS2D02G405500.1	Rad60-SLD	Ubiquitin-2 like Rad60 SUMO-like	58.3	2.1e-19	1	72	152	222
			-	535	G > T	179	Ala > Ser	TraesCS2D02G405500.1	Ubiquitin_2	Ubiquitin-like domain	19.9	3.3e-07	14	80	162	220
TraesCS3A02G087300	OsNADPH1	chr3A_56390500	-	875	C > T	292	Pro > Leu	TraesCS3A02G087300.1	ADH_zinc_N	Zinc-binding dehydrogenase	75.6	5.5e-25	1	128	166	305
			-	875	C > T	292	Pro > Leu	TraesCS3A02G087300.1	ADH_zinc_N_2	Zinc-binding dehydrogenase	33.3	1.5e-11	2	133	200	345
		chr3A_56390503	-	872	A > T	291	Glu > Val	TraesCS3A02G087300.1	ADH_zinc_N	Zinc-binding dehydrogenase	75.6	5.5e-25	1	128	166	305
		chr3A_56390503	-	872	A > T	291	Glu > Val	TraesCS3A02G087300.1	ADH_zinc_N_2	Zinc-binding dehydrogenase	33.3	1.5e-11	2	133	200	345
TraesCS3A02G263900	OsRACK1	chr3A_487854758	-	398	C > G	133	Ala > Gly	TraesCS3A02G263900.1	WD40	WD domain, G-beta repeat	30.9	3.8e-11	3	38	107	143
TraesCS4A02G097900	OsHsp71.1	chr4A_109424377	+	520	A > C	174	Met > Leu	TraesCS4A02G097900.1	HSP70	Hsp70 protein	863.6	6.7e-264	1	599	9	618
			+	520	A > C	174	Met > Leu	TraesCS4A02G097900.1	MreB_Mbl	MreB/Mbl protein	49.4	3.2e-17	79	316	129	380
		chr4A_109424379	+	522	G > C	174	Met > Ile	TraesCS4A02G097900.1	HSP70	Hsp70 protein	863.6	6.7e-264	1	599	9	618
		chr4A_109424379	+	522	G > C	174	Met > Ile	TraesCS4A02G097900.1	MreB_Mbl	MreB/Mbl protein	49.4	3.2e-17	79	316	129	380
TraesCS4A02G107600	-	chr4A_124405673	-	207	G > T	69	Arg > Ser	TraesCS4A02G107600.1	GTP_EFTU	Elongation factor Tu GTP binding domain	183.1	6.7e-58	1	191	5	222
		chr4A_124405852	-	28	A > G	10	Ile > Val	TraesCS4A02G107600.1	GTP_EFTU	Elongation factor Tu GTP binding domain	183.1	6.7e-58	1	191	5	222
		chr4A_124405858	-	22	A > C	8	Ile > Leu	TraesCS4A02G107600.1	GTP_EFTU	Elongation factor Tu GTP binding domain	183.1	6.7e-58	1	191	5	222
TraesCS4A02G126700	OsCam1-3	chr4A_163818872	+	212	A > C	71	Asn > Thr	TraesCS4A02G126700.1	EF-hand_1	EF hand	33.1	9.8e-12	1	28	48	75
			+	212	A > C	71	Asn > Thr	TraesCS4A02G126700.1	EF-hand_7	EF-hand domain pair	56.6	1.2e-18	3	69	12	73
			+	212	A > C	71	Asn > Thr	TraesCS4A02G126700.1	EF-hand_6	EF-hand domain	15.2	6.2e-06	2	27	49	74
			+	212	A > C	71	Asn > Thr	TraesCS4A02G126700.1	EF-hand_8	EF-hand domain pair	45.2	2.7e-15	2	53	25	75
			+	212	A > C	71	Asn > Thr	TraesCS4A02G126700.1	EF-hand_5	EF hand	21.8	4.1e-08	1	25	49	73
			+	212	A > C	71	Asn > Thr	TraesCS4A02G126700.1	EF-hand_9	EF-hand domain	36	2.9e-12	3	64	16	75
		chr4A_163818874	+	214	C > A	72	Leu > Met	TraesCS4A02G126700.1	EF-hand_1	EF hand	33.1	9.8e-12	1	28	48	75
		chr4A_163818874	+	214	C > A	72	Leu > Met	TraesCS4A02G126700.1	EF-hand_7	EF-hand domain pair	56.6	1.2e-18	3	69	12	73
		chr4A_163818874	+	214	C > A	72	Leu > Met	TraesCS4A02G126700.1	EF-hand_6	EF-hand domain	15.2	6.2e-06	2	27	49	74
		chr4A_163818874	+	214	C > A	72	Leu > Met	TraesCS4A02G126700.1	EF-hand_8	EF-hand domain pair	45.2	2.7e-15	2	53	25	75
		chr4A_163818874	+	214	C > A	72	Leu > Met	TraesCS4A02G126700.1	EF-hand_5	EF hand	21.8	4.1e-08	1	25	49	73
		chr4A_163818874	+	214	C > A	72	Leu > Met	TraesCS4A02G126700.1	EF-hand_9	EF-hand domain	36	2.9e-12	3	64	16	75
		chr4A_163818838	+	178	G > A	60	Gly > Ser	TraesCS4A02G126700.1	EF-hand_1	EF hand	33.1	9.8e-12	1	28	48	75
		chr4A_163818838	+	178	G > A	60	Gly > Ser	TraesCS4A02G126700.1	EF-hand_7	EF-hand domain pair	56.6	1.2e-18	3	69	12	73
		chr4A_163818838	+	178	G > A	60	Gly > Ser	TraesCS4A02G126700.1	EF-hand_6	EF-hand domain	15.2	6.2e-06	2	27	49	74
		chr4A_163818838	+	178	G > A	60	Gly > Ser	TraesCS4A02G126700.1	EF-hand_8	EF-hand domain pair	45.2	2.7e-15	2	53	25	75
		chr4A_163818838	+	178	G > A	60	Gly > Ser	TraesCS4A02G126700.1	EF-hand_5	EF hand	21.8	4.1e-08	1	25	49	73
		chr4A_163818838	+	178	G > A	60	Gly > Ser	TraesCS4A02G126700.1	EF-hand_9	EF-hand domain	36	2.9e-12	3	64	16	75
		chr4A_163818839	+	179	G > A	60	Gly > Asp	TraesCS4A02G126700.1	EF-hand_1	EF hand	33.1	9.8e-12	1	28	48	75
		chr4A_163818839	+	179	G > A	60	Gly > Asp	TraesCS4A02G126700.1	EF-hand_7	EF-hand domain pair	56.6	1.2e-18	3	69	12	73
		chr4A_163818839	+	179	G > A	60	Gly > Asp	TraesCS4A02G126700.1	EF-hand_6	EF-hand domain	15.2	6.2e-06	2	27	49	74
		chr4A_163818839	+	179	G > A	60	Gly > Asp	TraesCS4A02G126700.1	EF-hand_8	EF-hand domain pair	45.2	2.7e-15	2	53	25	75
		chr4A_163818839	+	179	G > A	60	Gly > Asp	TraesCS4A02G126700.1	EF-hand_5	EF hand	21.8	4.1e-08	1	25	49	73
		chr4A_163818839	+	179	G > A	60	Gly > Asp	TraesCS4A02G126700.1	EF-hand_9	EF-hand domain	36	2.9e-12	3	64	16	75
TraesCS4A02G190500	OsRPS16B	chr4A_469102264	+	286	G > A	96	Val > Ile	TraesCS4A02G190500.1	Ribosomal_S9	Ribosomal protein S9/S16	108.4	1.7e-35	1	121	17	149
		chr4A_469102283	+	305	A > T	102	Tyr > Phe	TraesCS4A02G190500.1	Ribosomal_S9	Ribosomal protein S9/S16	108.4	1.7e-35	1	121	17	149
TraesCS4B02G128700	AtRPL8A	chr4B_168566902	+	469	A > G	157	Ile > Val	TraesCS4B02G128700.1	Ribosomal_L2_C	Ribosomal Proteins L2, C-terminal domain	150.9	2e-48	2	115	98	224
TraesCS4B02G178200	TaCaM1-1	chr4B_390280839	+	178	G > A	60	Gly > Ser	TraesCS4B02G178200.1	EF-hand_1	EF hand	33.1	1.1e-11	1	28	48	75
			+	178	G > A	60	Gly > Ser	TraesCS4B02G178200.1	EF-hand_7	EF-hand domain pair	56.6	1.3e-18	3	69	12	73
			+	178	G > A	60	Gly > Ser	TraesCS4B02G178200.1	EF-hand_8	EF-hand domain pair	45.2	3e-15	2	53	25	75
			+	178	G > A	60	Gly > Ser	TraesCS4B02G178200.1	EF-hand_6	EF-hand domain	15.2	7e-06	2	27	49	74
			+	178	G > A	60	Gly > Ser	TraesCS4B02G178200.1	EF-hand_5	EF hand	21.8	4.6e-08	1	25	49	73
			+	178	G > A	60	Gly > Ser	TraesCS4B02G178200.1	EF-hand_9	EF-hand domain	36	3.3e-12	3	64	16	75
		chr4B_390280840	+	179	G > A	60	Gly > Asp	TraesCS4B02G178200.1	EF-hand_1	EF hand	33.1	1.1e-11	1	28	48	75
			+	179	G > A	60	Gly > Asp	TraesCS4B02G178200.1	EF-hand_7	EF-hand domain pair	56.6	1.3e-18	3	69	12	73
			+	179	G > A	60	Gly > Asp	TraesCS4B02G178200.1	EF-hand_8	EF-hand domain pair	45.2	3e-15	2	53	25	75
			+	179	G > A	60	Gly > Asp	TraesCS4B02G178200.1	EF-hand_6	EF-hand domain	15.2	7e-06	2	27	49	74
			+	179	G > A	60	Gly > Asp	TraesCS4B02G178200.1	EF-hand_5	EF hand	21.8	4.6e-08	1	25	49	73
			+	179	G > A	60	Gly > Asp	TraesCS4B02G178200.1	EF-hand_9	EF-hand domain	36	3.3e-12	3	64	16	75
		chr4B_390280873	+	212	A > C	71	Asn > Thr	TraesCS4B02G178200.1	EF-hand_1	EF hand	33.1	1.1e-11	1	28	48	75
			+	212	A > C	71	Asn > Thr	TraesCS4B02G178200.1	EF-hand_7	EF-hand domain pair	56.6	1.3e-18	3	69	12	73
			+	212	A > C	71	Asn > Thr	TraesCS4B02G178200.1	EF-hand_8	EF-hand domain pair	45.2	3e-15	2	53	25	75
			+	212	A > C	71	Asn > Thr	TraesCS4B02G178200.1	EF-hand_6	EF-hand domain	15.2	7e-06	2	27	49	74
			+	212	A > C	71	Asn > Thr	TraesCS4B02G178200.1	EF-hand_5	EF hand	21.8	4.6e-08	1	25	49	73
			+	212	A > C	71	Asn > Thr	TraesCS4B02G178200.1	EF-hand_9	EF-hand domain	36	3.3e-12	3	64	16	75
		chr4B_390280875	+	214	C > A	72	Leu > Met	TraesCS4B02G178200.1	EF-hand_1	EF hand	33.1	1.1e-11	1	28	48	75
			+	214	C > A	72	Leu > Met	TraesCS4B02G178200.1	EF-hand_7	EF-hand domain pair	56.6	1.3e-18	3	69	12	73
			+	214	C > A	72	Leu > Met	TraesCS4B02G178200.1	EF-hand_8	EF-hand domain pair	45.2	3e-15	2	53	25	75
			+	214	C > A	72	Leu > Met	TraesCS4B02G178200.1	EF-hand_6	EF-hand domain	15.2	7e-06	2	27	49	74
			+	214	C > A	72	Leu > Met	TraesCS4B02G178200.1	EF-hand_5	EF hand	21.8	4.6e-08	1	25	49	73
			+	214	C > A	72	Leu > Met	TraesCS4B02G178200.1	EF-hand_9	EF-hand domain	36	3.3e-12	3	64	16	75
TraesCS4D02G140800	OsHSP70	chr4D_124260515	-	1310	A > T	437	Tyr > Phe	TraesCS4D02G140800.1	HSP70	Hsp70 protein	864.2	4.2e-264	1	599	9	618
TraesCS4D02G207500	OsHsp71.1	chr4D_355860084	-	477	C > T	159	Glu > Gln	TraesCS4D02G207500.1	HSP70	Hsp70 protein	863.3	8e-264	1	599	9	618
			-	477	C > T	159	Glu > Gln	TraesCS4D02G207500.1	MreB_Mbl	MreB/Mbl protein	49.4	3.2e-17	79	316	129	380
		chr4D_355860059	-	386	A > C	129	Asn > Thr	TraesCS4D02G207500.1	HSP70	Hsp70 protein	863.3	8e-264	1	599	9	618
			-	386	A > C	129	Asn > Thr	TraesCS4D02G207500.1	MreB_Mbl	MreB/Mbl protein	49.4	3.2e-17	79	316	129	380
TraesCS6A02G119700	rubi3	chr6A_91424479	+	310	G > T	104	Ala > Ser	TraesCS6A02G119700.1	ubiquitin	Ubiquitin family	115.7	2.2e-37	1	72	79	150
			+	310	G > T	104	Ala > Ser	TraesCS6A02G119700.1	Rad60-SLD	Ubiquitin-2 like Rad60 SUMO-like	59.6	7.7e-20	1	72	77	147
			+	310	G > T	104	Ala > Ser	TraesCS6A02G119700.1	Ubiquitin_2	Ubiquitin-like domain	21.1	1.3e-07	14	80	87	145
			+	310	G > T	104	Ala > Ser	TraesCS6A02G119700.1	TBK1_ULD	TANK binding kinase 1 ubiquitin-like domain	15.7	4.2e-06	19	53	93	127
			+	310	G > T	104	Ala > Ser	TraesCS6A02G119700.1	Ubiquitin_5	Ubiquitin-like domain	15	8.9e-06	34	93	89	149
TraesCS6B02G110300	-	chr6B_92532418	-	310	G > T	104	Ala > Ser	TraesCS6B02G110300.1	ubiquitin	Ubiquitin family	114	4.3e-37	1	72	79	150
			-	310	G > T	104	Ala > Ser	TraesCS6B02G110300.1	Rad60-SLD	Ubiquitin-2 like Rad60 SUMO-like	57.9	1.5e-19	1	72	77	147
			-	310	G > T	104	Ala > Ser	TraesCS6B02G110300.1	Ubiquitin_2	Ubiquitin-like domain	19.5	2.3e-07	14	80	87	145
			-	310	G > T	104	Ala > Ser	TraesCS6B02G110300.1	TBK1_ULD	TANK binding kinase 1 ubiquitin-like domain	14.2	6.8e-06	19	53	93	127
TraesCS6B02G148000	UBQ11	chr6B_149055266	+	85	G > T	29	Ala > Ser	TraesCS6B02G148000.1	ubiquitin	Ubiquitin family	114.4	7.8e-37	1	72	4	75
			+	85	G > T	29	Ala > Ser	TraesCS6B02G148000.1	Rad60-SLD	Ubiquitin-2 like Rad60 SUMO-like	58.3	2.7e-19	1	72	2	72
			+	85	G > T	29	Ala > Ser	TraesCS6B02G148000.1	Ubiquitin_2	Ubiquitin-like domain	19.9	4.2e-07	14	80	12	70
		chr6B_149055389	+	208	C > T	70	Leu > Phe	TraesCS6B02G148000.1	ubiquitin	Ubiquitin family	114.4	7.8e-37	1	72	4	75
			+	208	C > T	70	Leu > Phe	TraesCS6B02G148000.1	Rad60-SLD	Ubiquitin-2 like Rad60 SUMO-like	58.3	2.7e-19	1	72	2	72
			+	208	C > T	70	Leu > Phe	TraesCS6B02G148000.1	Ubiquitin_2	Ubiquitin-like domain	19.9	4.2e-07	14	80	12	70
TraesCS7A02G119700	-	chr7A_77150263	+	161	A > G	54	Lys > Arg	TraesCS7A02G119700.1	Histone	Core histone H2A/H2B/H3/H4	181.5	4.4e-58	1	131	1	132
		chr7A_77150343	+	241	A > T	81	Thr > Ser	TraesCS7A02G119700.1	Histone	Core histone H2A/H2B/H3/H4	181.5	4.4e-58	1	131	1	132
		chr7A_77150227	+	125	T > A	42	Phe > Tyr	TraesCS7A02G119700.1	Histone	Core histone H2A/H2B/H3/H4	181.5	4.4e-58	1	131	1	132
